# Supplementary material for: 'Menthol-Plus’: a major category of cigarette found among ‘concept’ descriptor cigarettes from Mexico
Source: HighWire-hosted journal article supplement (doi:10.1136/tobaccocontrol-2020-056173), 2021-03-09

Supplementary Materials

~Figures~

“Menthol-Plus”: A Major Category of Cigarette Found Among  
“Concept Descriptor” Cigarettes from Mexico

James F. Pankow, Wentai Luo, Kevin J. McWhirter, Samantha M. Gillette, and Joanna E. Cohen.

| List of Supplementary Figures                 |                                                       |
|-----------------------------------------------|-------------------------------------------------------|
| Pack and Filter Photos, and Flavor Bar Charts |                                                       |
| S1.a/b                                        | Marlboro "Fusion Shine" – Mexico                      |
| S2.a/b                                        | Lucky Strike "Convertibles, Blue" – Mexico            |
| S3.a/b                                        | Lucky Strike "Flow Filter" March – Mexico             |
| S4.a/b                                        | Marlboro "Velvet Fusion Blast" – Mexico               |
| S5.a/b                                        | Marlboro "Double Fusion Velvet" – Mexico              |
| S6.a/b                                        | Lucky Strike "Flow Filter" October – Mexico           |
| S7.a/b                                        | Benson & Hedges "Polar Pearls" – Mexico               |
| S8.a/b                                        | Marlboro "Amber" – Mexico                             |
| S9.a/b                                        | Marlboro "Double Fusion Amber" – Mexico               |
| S10.a/b                                       | Pall Mall/XL "Mystery" – Mexico                       |
| S11.a/b                                       | Marlboro "Capsula Fresca" – Mexico                    |
| S12.a/b                                       | Lucky Strike "Convertibles, Purple" – Mexico          |
| S13.a/b                                       | Pall Mall/XL "Tokyo Midnight" – Mexico                |
| S14.a/b                                       | Marlboro "Ruby Fusion Blast" – Mexico                 |
| S15.a/b                                       | Pall Mall/XL "Black Edition/Maui Crepuscule" – Mexico |
| S16.a/b                                       | Marlboro "Double Fusion Ruby" – Mexico                |
| S17.a/b                                       | Chesterfield "Caps Purple" – Mexico                   |
| S18.a/b                                       | Benson & Hedges "Crystal Violet" – Mexico             |
| S19.a/b                                       | Pall Mall/XL "Black Edition/Ibiza Sunset" – Mexico    |
| S20.a/b                                       | Pall Mall "Wave" – Mexico                             |
| S21.a/b                                       | Pall Mall/XL "Mykonos Nightfall" – Mexico             |
| S22.a/b                                       | Benson & Hedges "Crystal Blue" – Mexico               |
| S23.a/b                                       | Next "Green" – Canada                                 |
| S24.a/b                                       | John Player "Choice" – Canada                         |
| S25.a/b                                       | Benson & Hedges "Unison" – Canada                     |
| S26.a/b                                       | Camel "North, Aqua Filter" – Canada                   |
| S27.a/b                                       | Du Maurier "Nano Blue" – Canada                       |
| Additional Supplementary Figures              |                                                       |
| S28                                           | Triacetin vs. Menthol                                 |
| S29                                           | Total Other Flavor Chemicals (TOFCs) vs. Menthol      |

# Figure S1.a. Pack #1. Marlboro “Fusion Shine” (M+4) (Mexico)

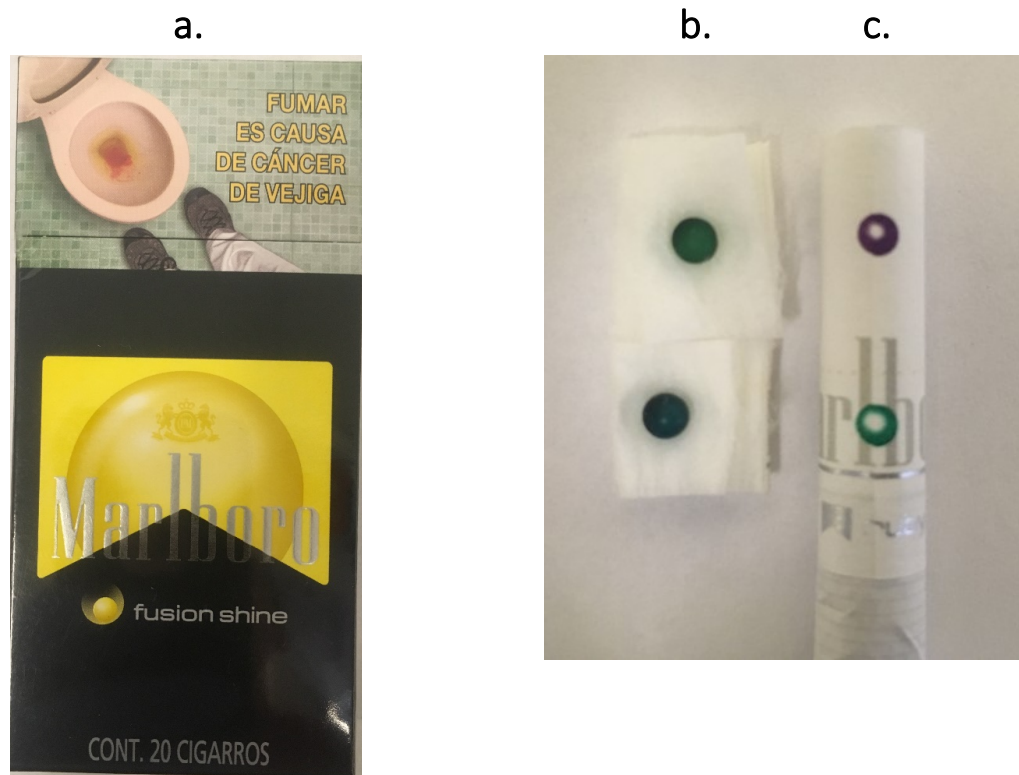

- a. Photo of pack (front);
- b. Opened filter showing two crushable flavor capsules (uncrushed);
- b. Filter end of cigarette.

Photos Copyright Portland State University, 2020.

Figure S1.b. Pack #1. Marlboro “Fusion Shine” (M+4)

TOFCs = total other flavour compounds; TFFCs = total fruit flavour compounds;  
TNMNFFCs = total non-menthol non-fruit flavour compounds.

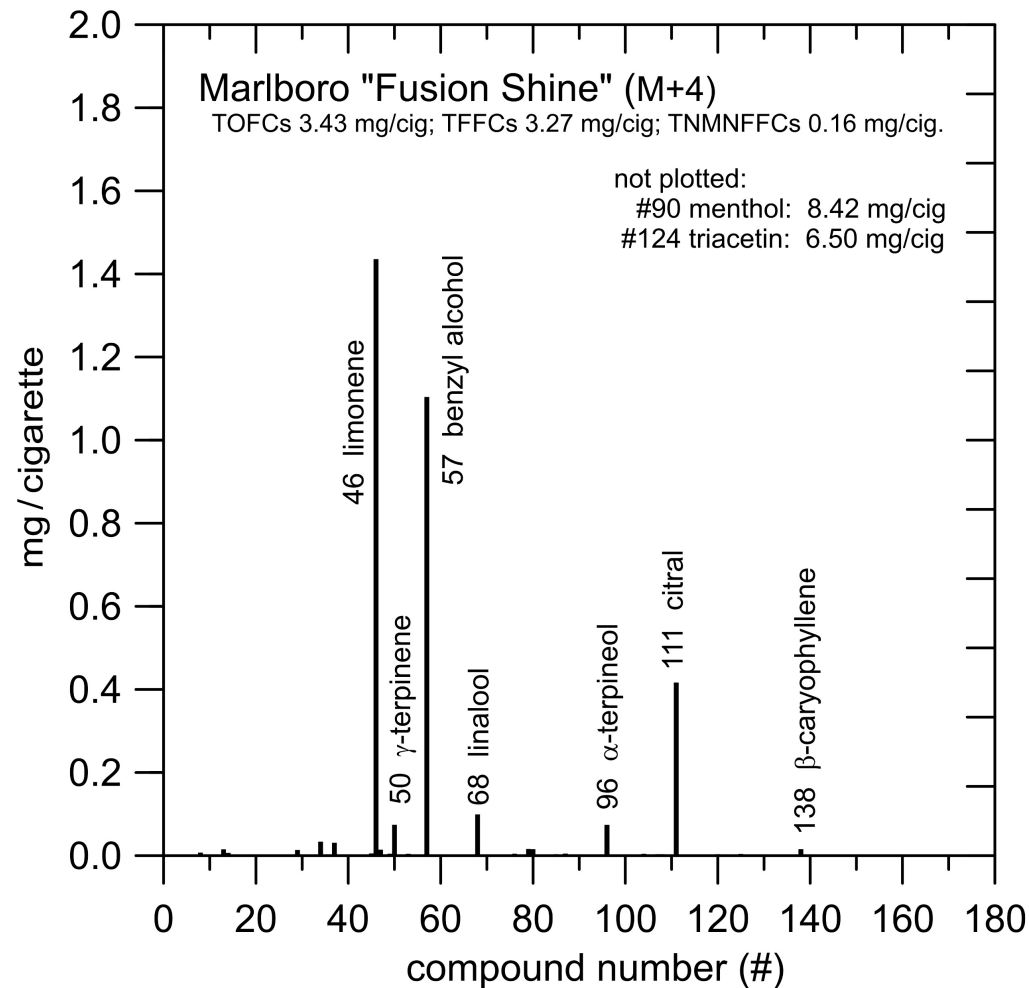

Figure S2.a. Pack #2. Lucky Strike “Convertibles” blue (M+3) (Mexico)

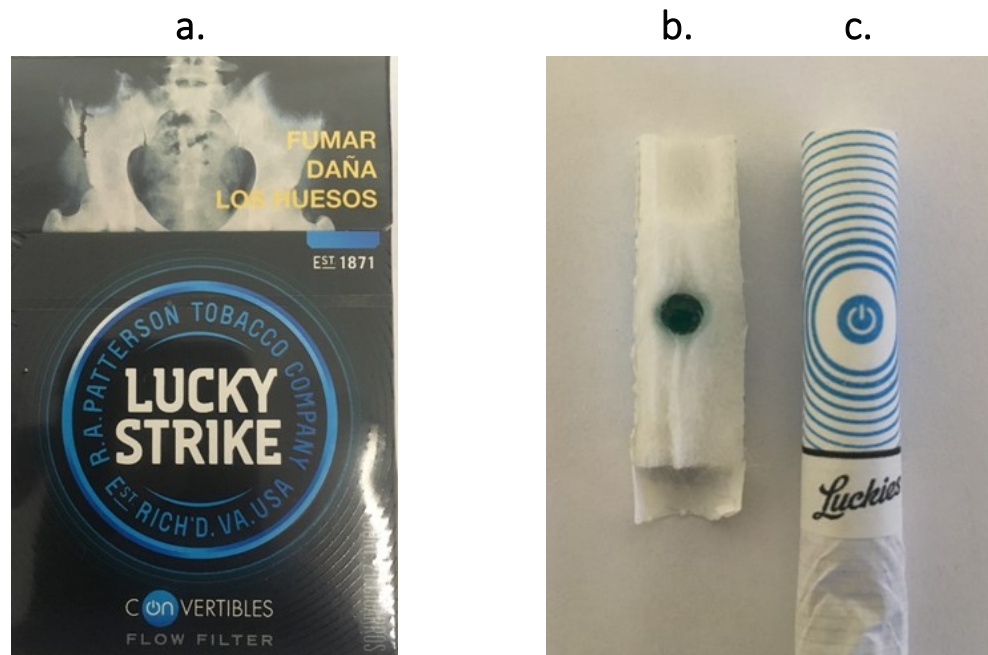

- a. Photo of pack (front);
- b. Opened filter showing one crushable flavor capsule (uncrushed);
- b. Filter end of cigarette.

Photos Copyright Portland State University, 2020.

Figure S2.b. Pack #2. Lucky Strike “Convertibles” blue (M+3)

TOFCs = total other flavour compounds; TFFCs = total fruit flavour compounds;  
TNMNFFCs = total non-menthol non-fruit flavour compounds.

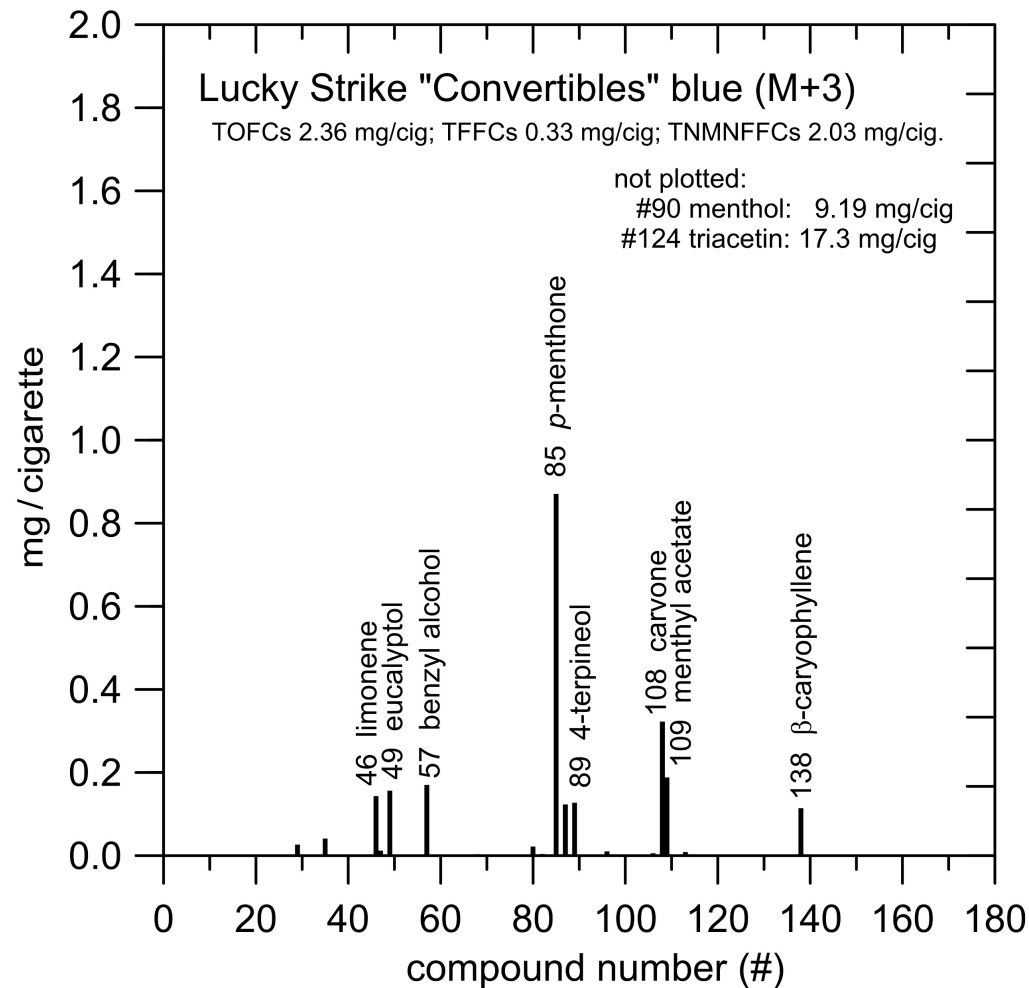

## Figure S3.a. Pack #3. Lucky Strike “Flow Filter” March

Sampler Flavour Categories: blue, M+3; orange, M+1+, red, M+1; and green, M+1.

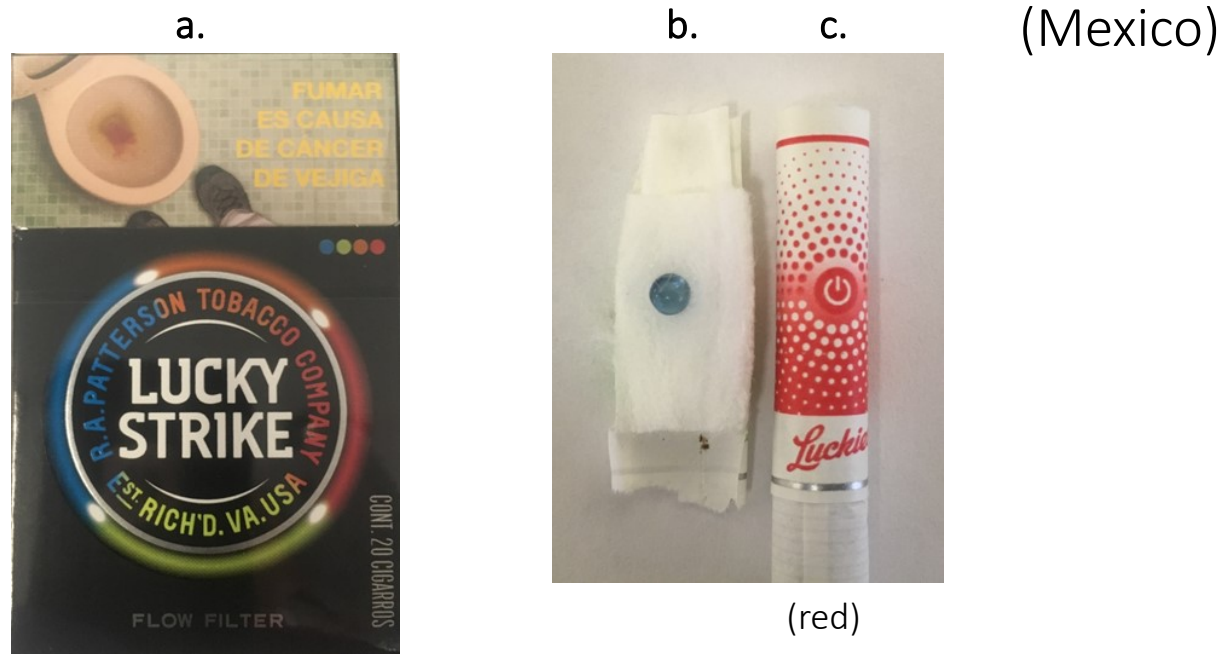

- a. Photo of pack (front);
- b. Opened filter (red version) showing one crushable flavor capsule (uncrushed);
- b. Filter end of cigarette.

Photos Copyright Portland State University, 2020.

Figure S3.b.1. Pack #3. Lucky Strike “Flow Filter” March/blue (M+3)

TOFCs = total other flavour compounds; TFFCs = total fruit flavour compounds;  
TNMNFFCs = total non-menthol non-fruit flavour compounds.

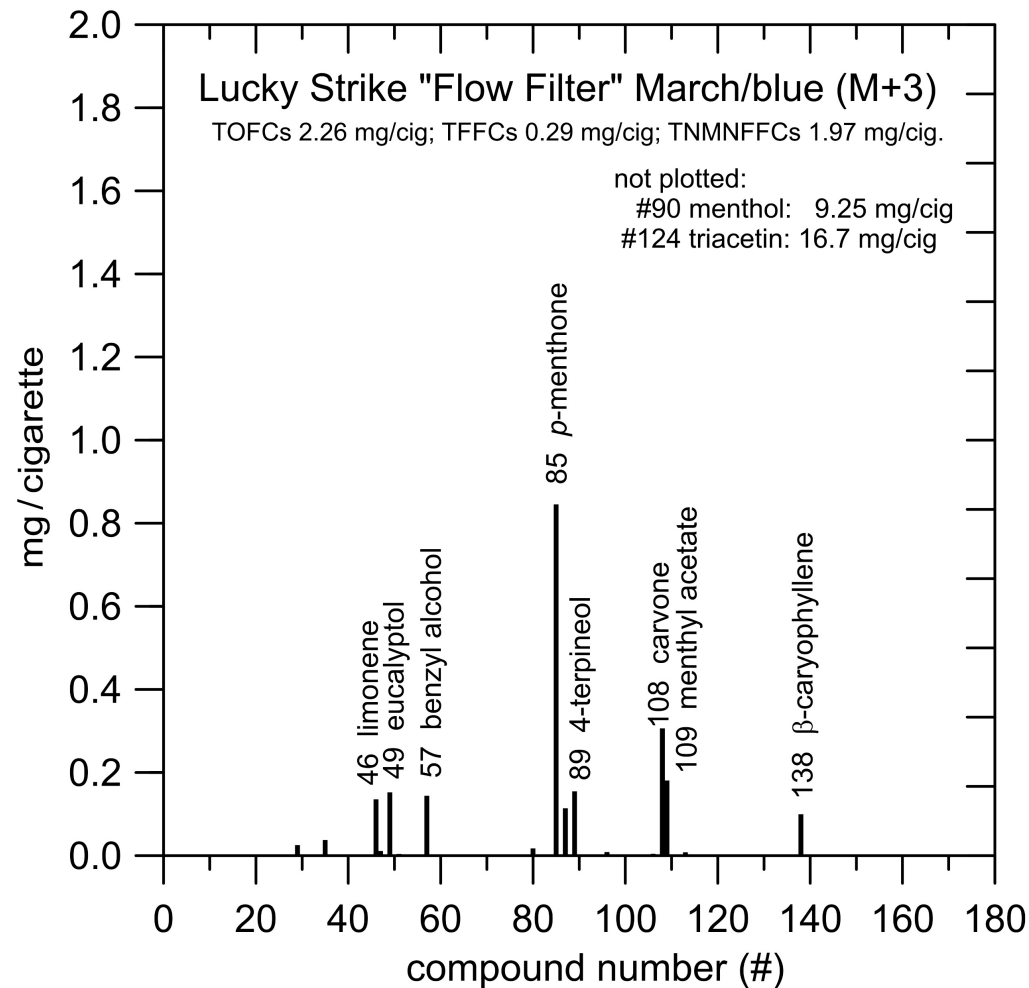

Figure S3.b.2. Pack #3. Lucky Strike “Flow Filter” March/orange (M+1)

TOFCs = total other flavour compounds; TFFCs = total fruit flavour compounds;  
TNMNFFCs = total non-menthol non-fruit flavour compounds.

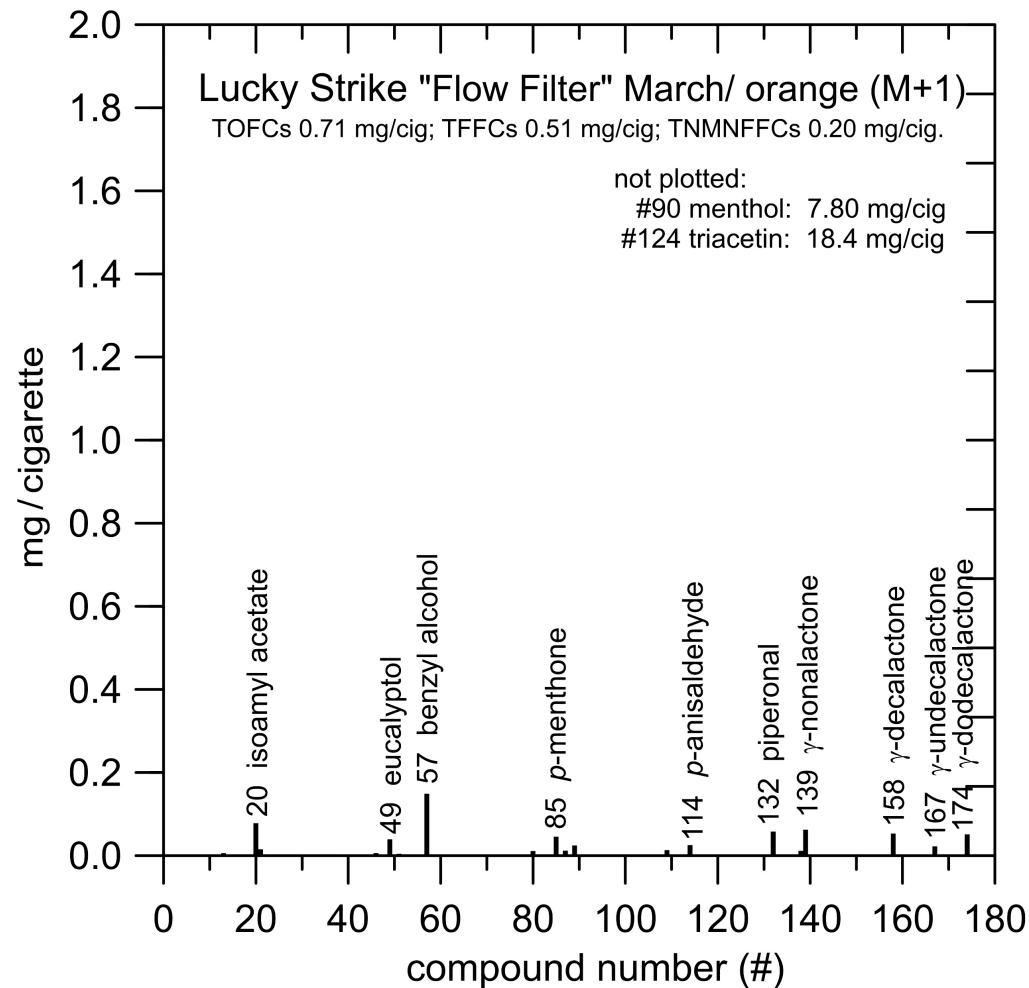

Figure S3.b.3. Pack #3. Lucky Strike “Flow Filter” March/red (M+1)

TOFCs = total other flavour compounds; TFFCs = total fruit flavour compounds;  
TNMNFFCs = total non-menthol non-fruit flavour compounds.

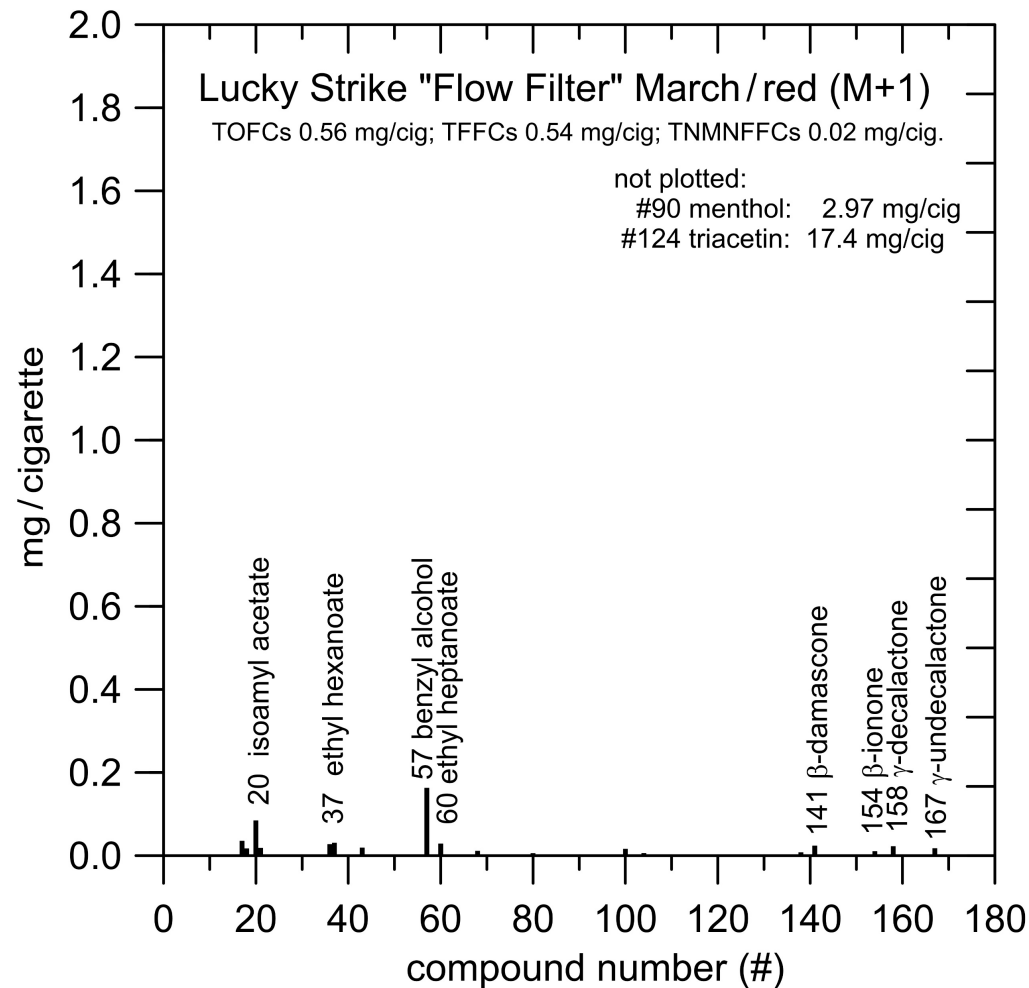

Figure S3.b.4. Pack #3. Lucky Strike “Flow Filter” March/green (M+1)

TOFCs = total other flavour compounds; TFFCs = total fruit flavour compounds;  
TNMNFFCs = total non-menthol non-fruit flavour compounds.

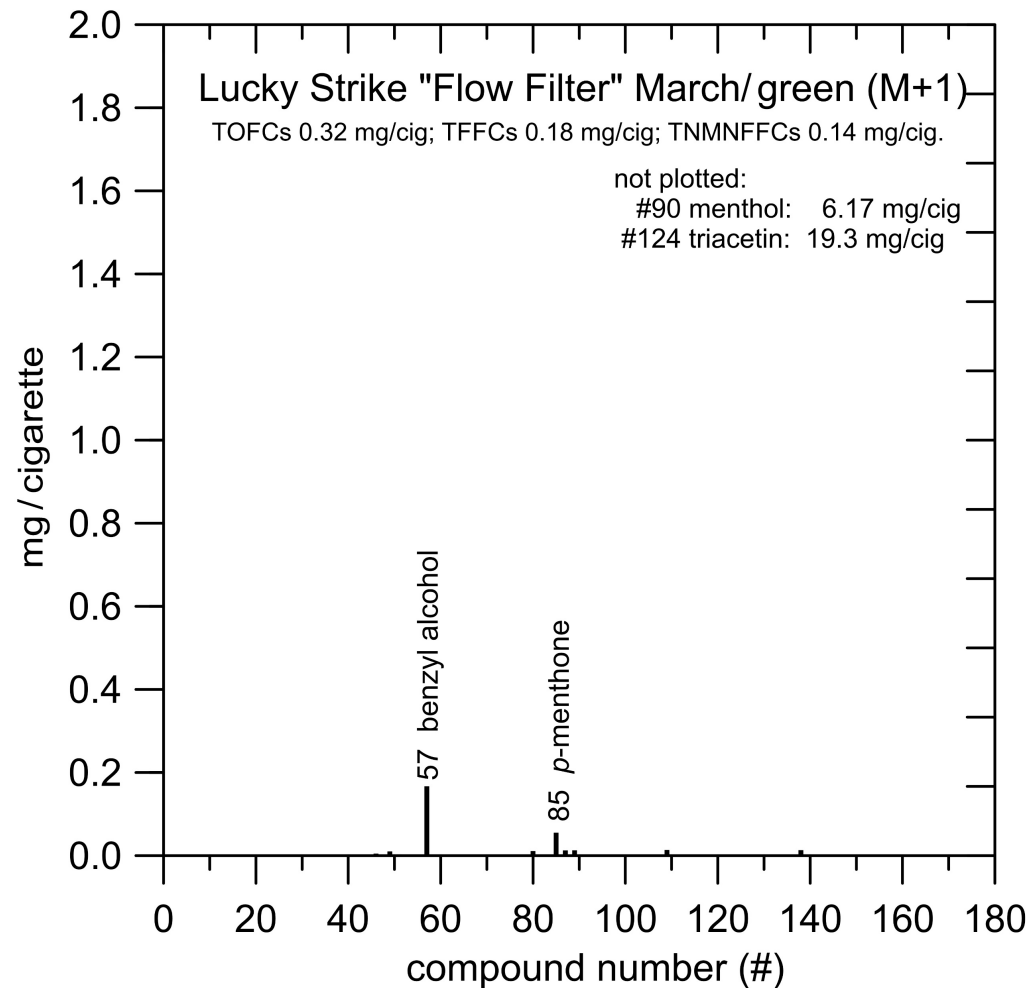

# Figure S4.a. Pack #4. Marlboro “Velvet Fusion Blast” (M+2) (Mexico)

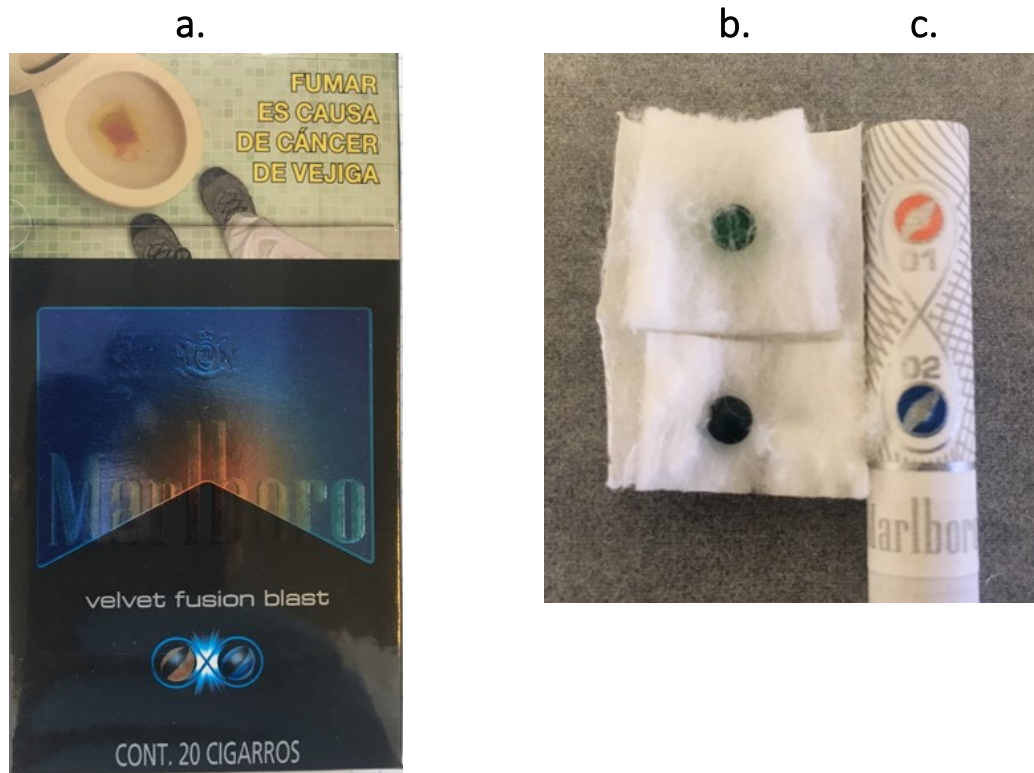

- a. Photo of pack (front);
- b. Opened filter showing two crushable flavor capsules (uncrushed);
- b. Filter end of cigarette.

Photos Copyright Portland State University, 2020.

Figure S4.b. Pack #4. Marlboro “Velvet Fusion Blast” (M+2)

TOFCs = total other flavour compounds; TFFCs = total fruit flavour compounds;  
TNMNFFCs = total non-menthol non-fruit flavour compounds.

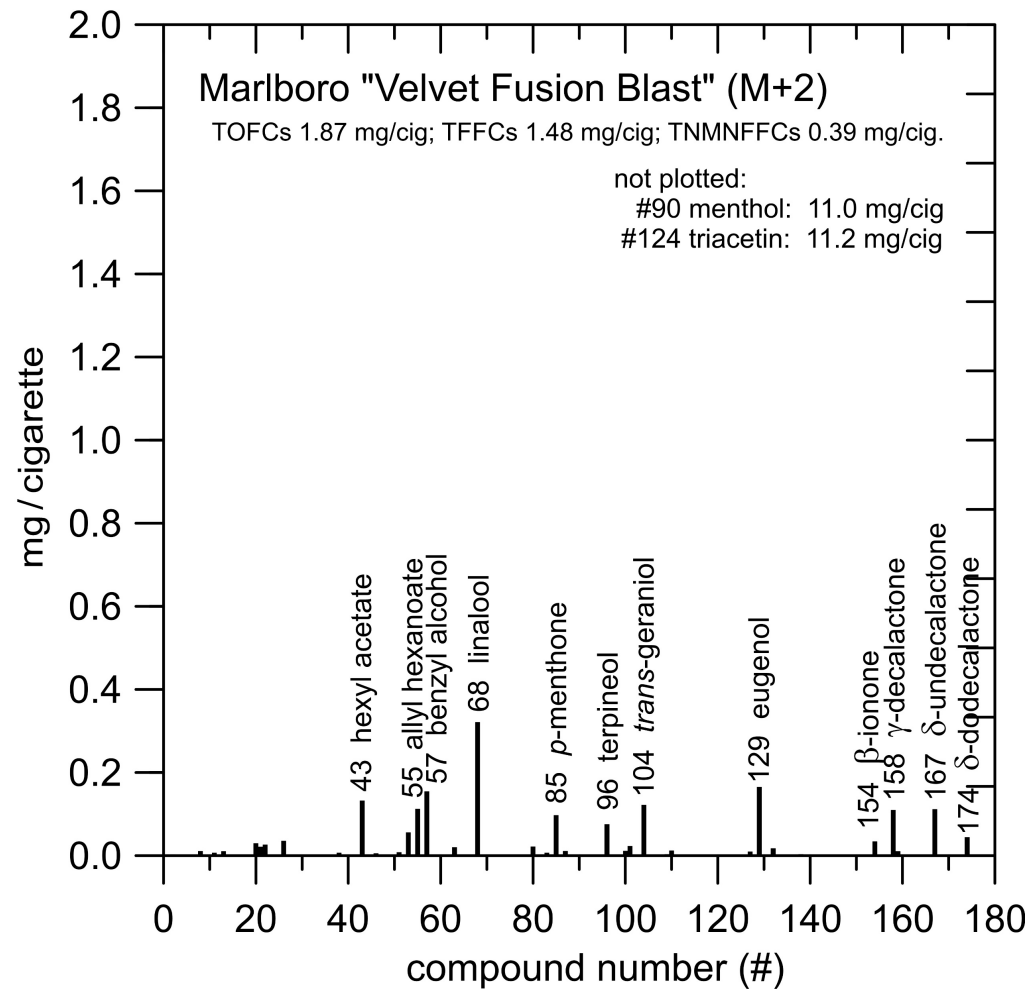

# Figure S5.a. Pack #5. Marlboro “Double Fusion Velvet” (M+2) (Mexico)

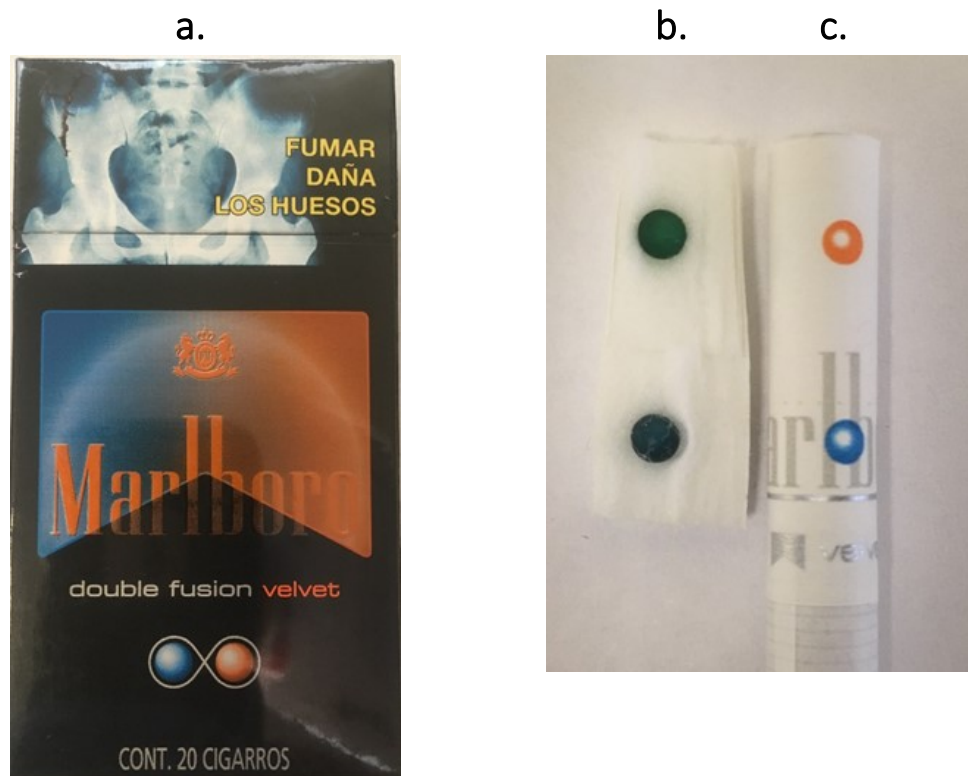

- a. Photo of pack (front);
- b. Opened filter showing two crushable flavor capsules (uncrushed);
- b. Filter end of cigarette.

Photos Copyright Portland State University, 2020.

Figure S5.b. Pack #5. Marlboro “Double Fusion Velvet” (M+2)

TOFCs = total other flavour compounds; TFFCs = total fruit flavour compounds;  
TNMNFFCs = total non-menthol non-fruit flavour compounds.

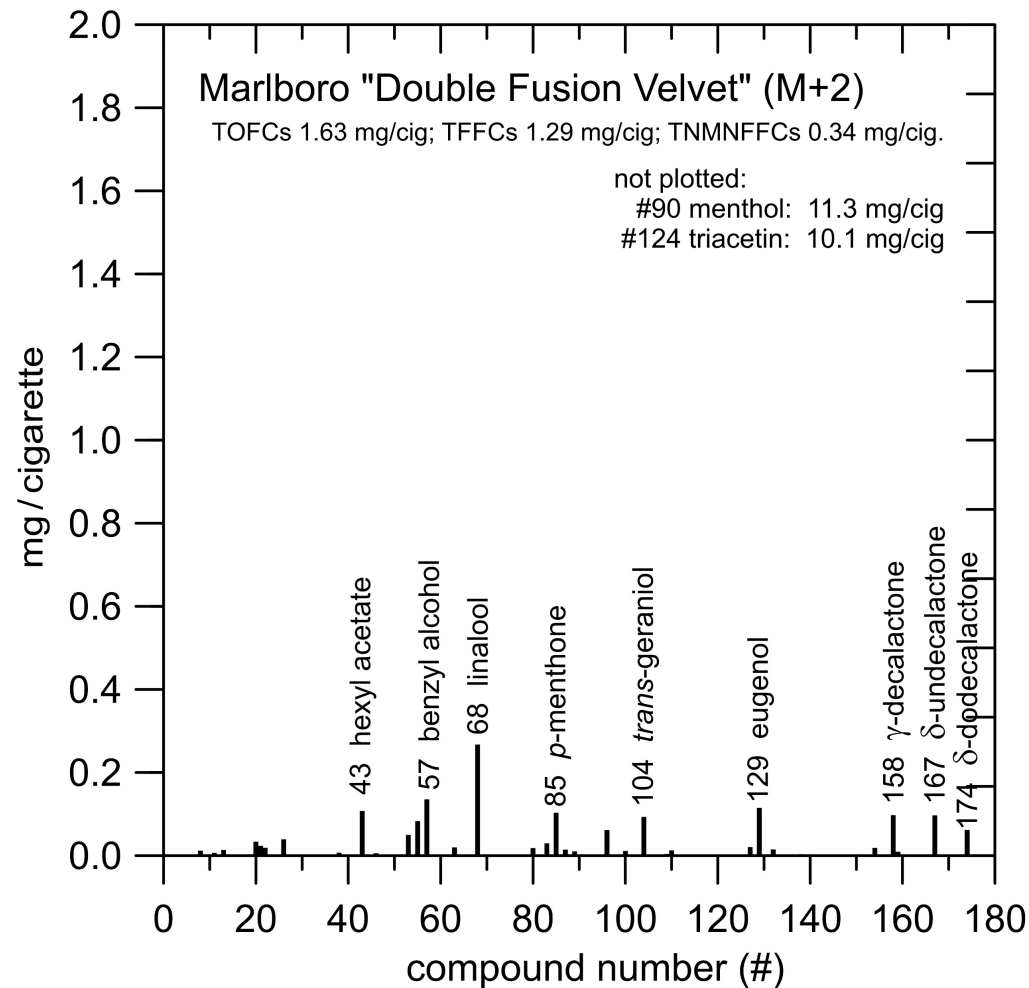

## Figure S6.a. Pack #6. Lucky Strike “Flow Filter” (October)

Sampler Flavour Categories: light green, M+2; purple, M+1; red, M+1+; and green, M+1.

(Mexico)

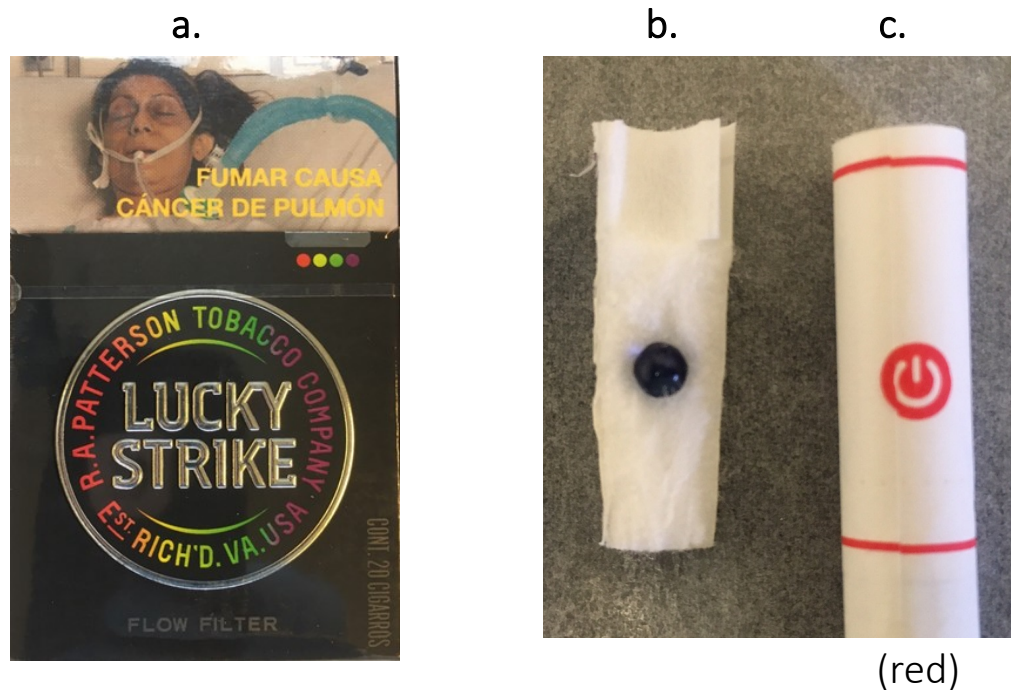

- a. Photo of pack (front);
- b. Opened filter (red version) showing one crushable flavor capsule (uncrushed);
- b. Filter end of cigarette.

Photos Copyright Portland State University, 2020.

Figure S6.b.1. Pack #6. Lucky Strike “Flow Filter” October/lit. green (M+2)

TOFCs = total other flavour compounds; TFFCs = total fruit flavour compounds;  
TNMNFFCs = total non-menthol non-fruit flavour compounds.

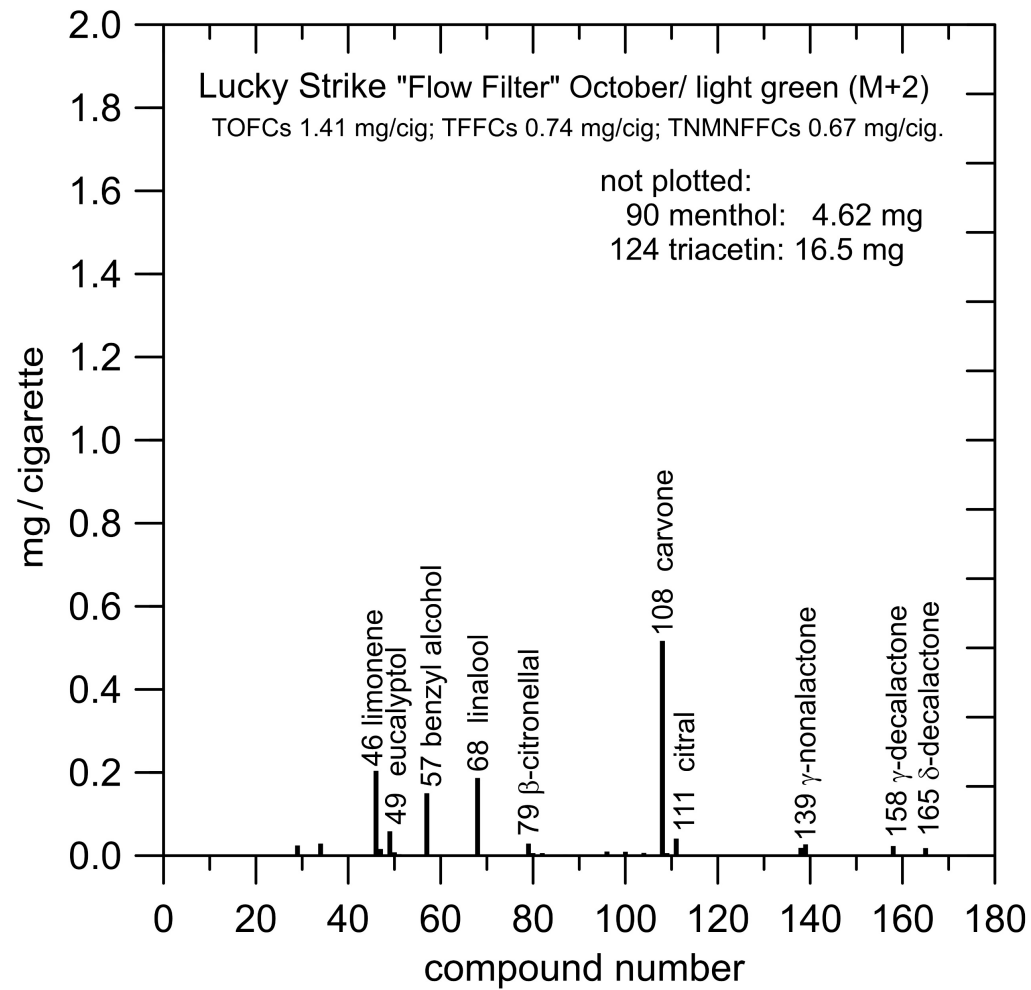

Figure S6.b.2. Pack #6. Lucky Strike “Flow Filter” October/purple (M+1)

TOFCs = total other flavour compounds; TFFCs = total fruit flavour compounds;  
TNMNFFCs = total non-menthol non-fruit flavour compounds.

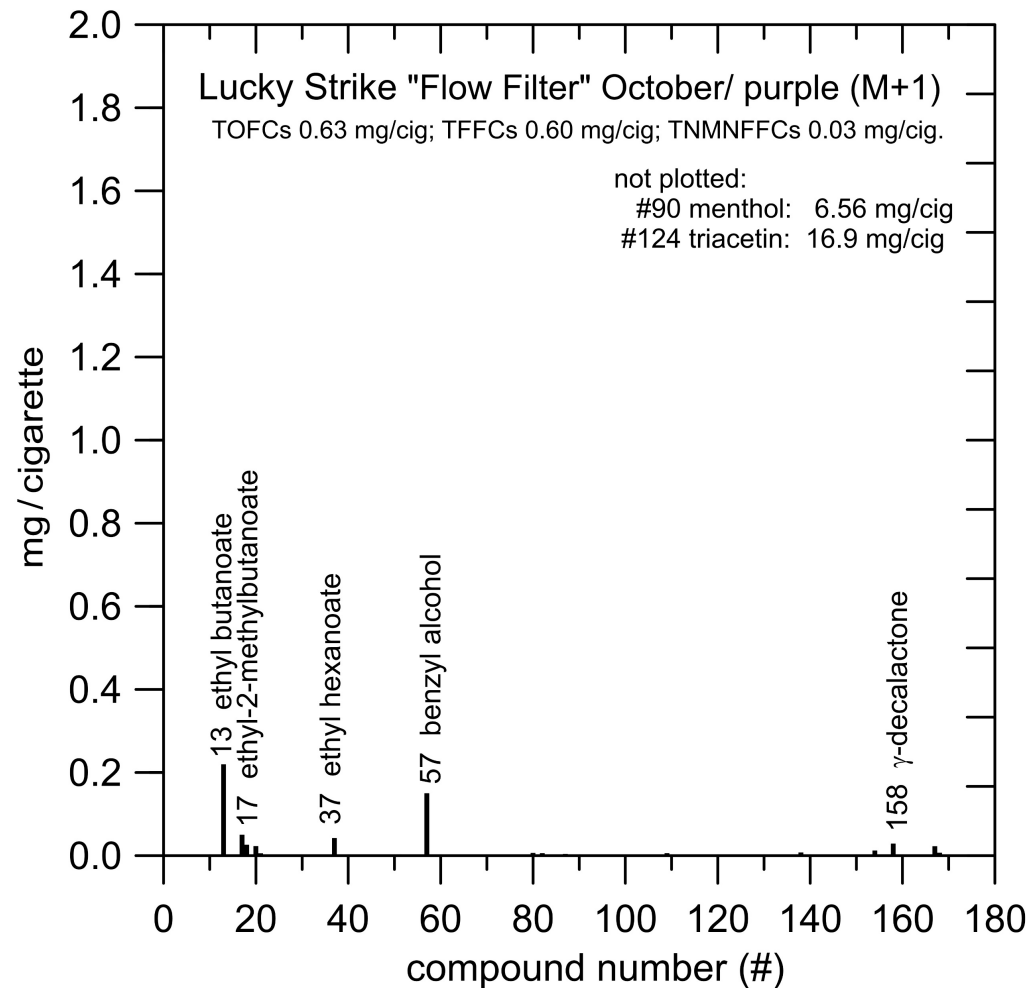

Figure S6.b.3. Pack #6. Lucky Strike “Flow Filter” October/red (M+1)

TOFCs = total other flavour compounds; TFFCs = total fruit flavour compounds;  
TNMNFFCs = total non-menthol non-fruit flavour compounds.

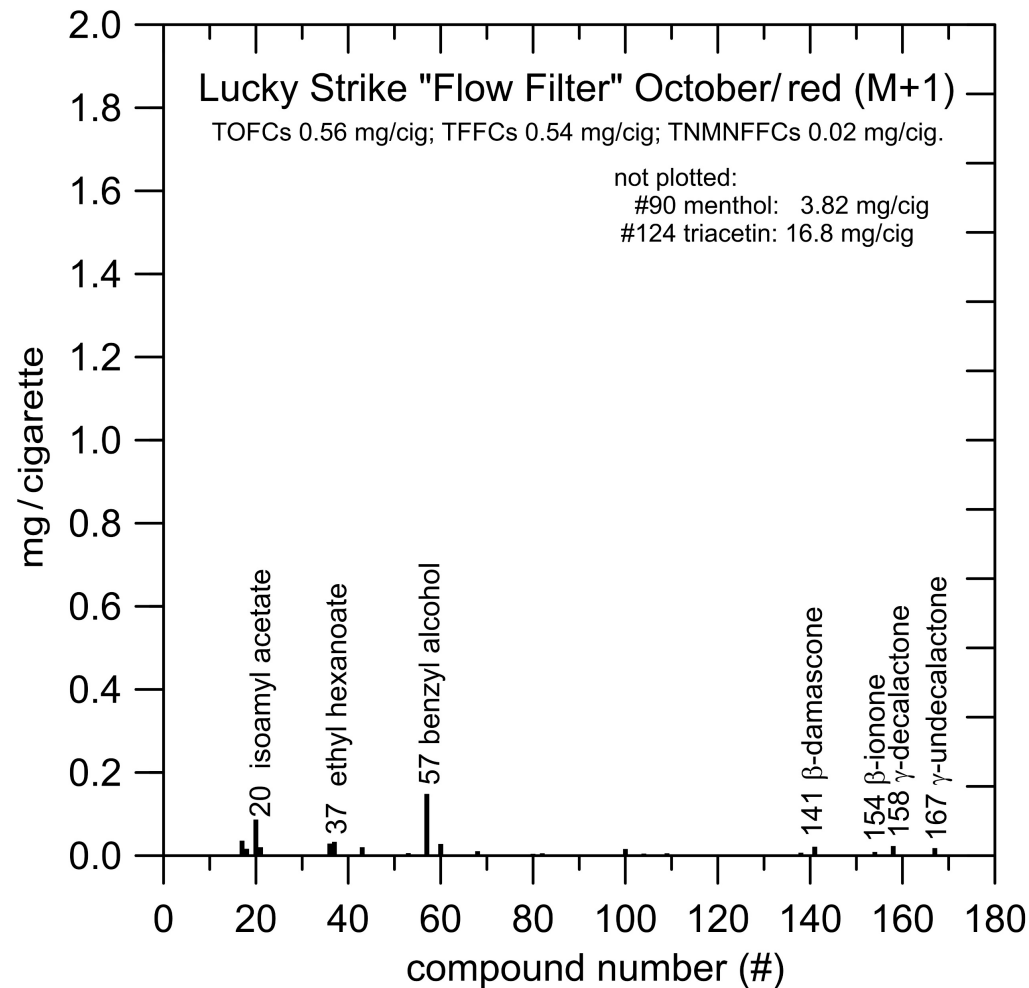

Figure S6.b.4. Pack #6. Lucky Strike “Flow Filter” October/green (M+1)

TOFCs = total other flavour compounds; TFFCs = total fruit flavour compounds;  
TNMNFFCs = total non-menthol non-fruit flavour compounds.

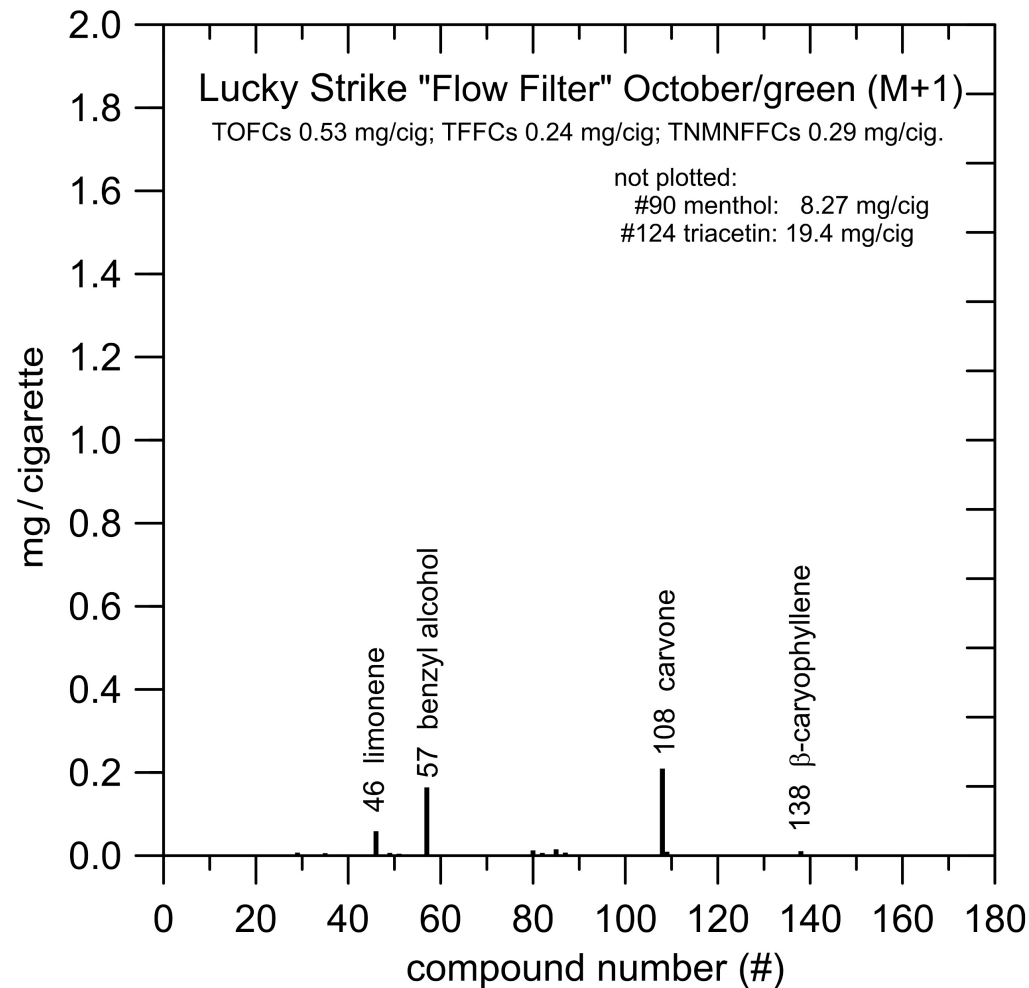

# Figure S7.a. Pack #7. Benson & Hedges “Polar Pearls” (M+2) (Mexico)

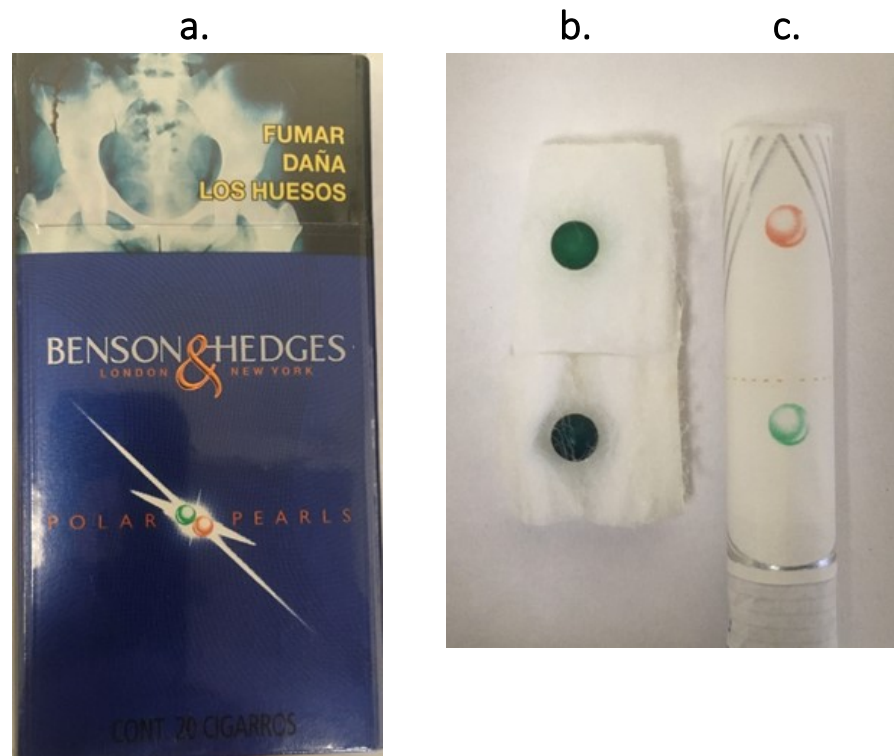

- a. Photo of pack (front);
- b. Opened filter showing two crushable flavor capsules (uncrushed);
- b. Filter end of cigarette.

Photos Copyright Portland State University, 2020.

Figure S7.b. Pack #7. Benson & Hedges “Polar Pearls” (M+2)

TOFCs = total other flavour compounds; TFFCs = total fruit flavour compounds;  
TNMNFFCs = total non-menthol non-fruit flavour compounds.

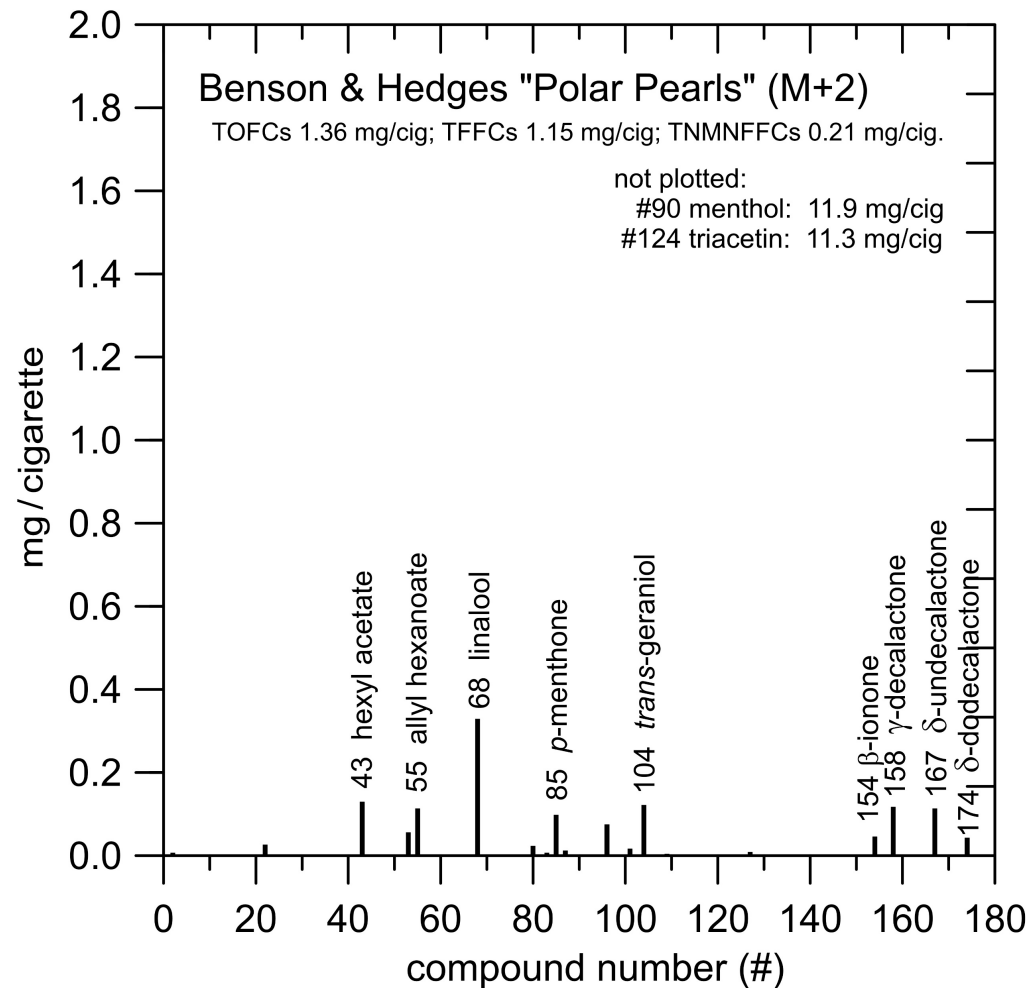

Figure S8.a. Pack #8. Marlboro “Amber” (M+2)  
(Mexico)

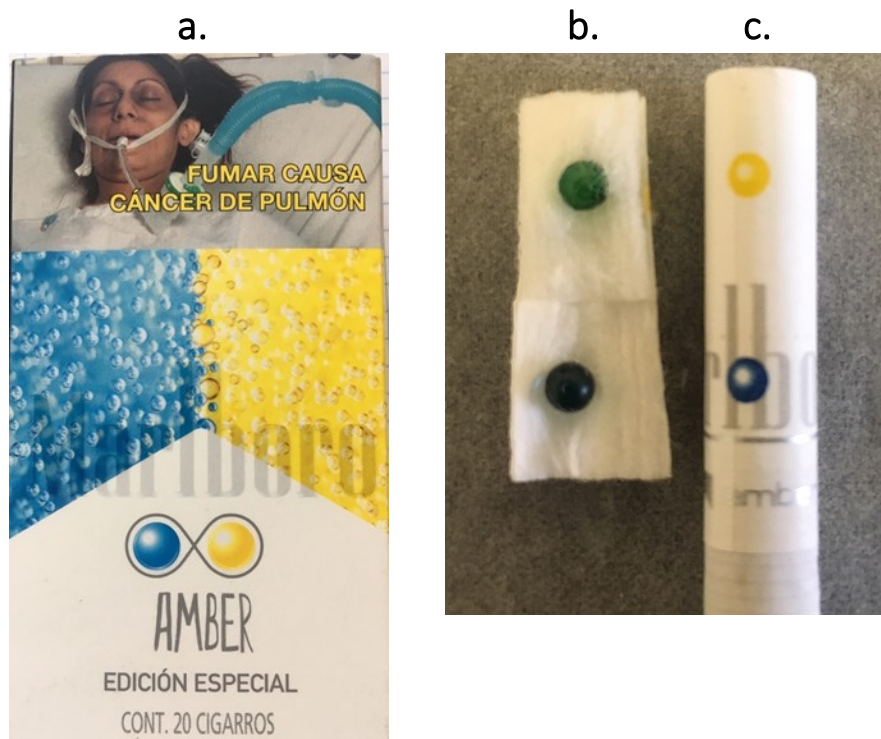

- a. Photo of pack (front);
- b. Opened filter showing two crushable flavor capsules (uncrushed);
- b. Filter end of cigarette.

Photos Copyright Portland State University, 2020.

Figure S8.b. Pack #8. Marlboro “Amber” (M+2)

TOFCs = total other flavour compounds; TFFCs = total fruit flavour compounds;  
TNMNFFCs = total non-menthol non-fruit flavour compounds.

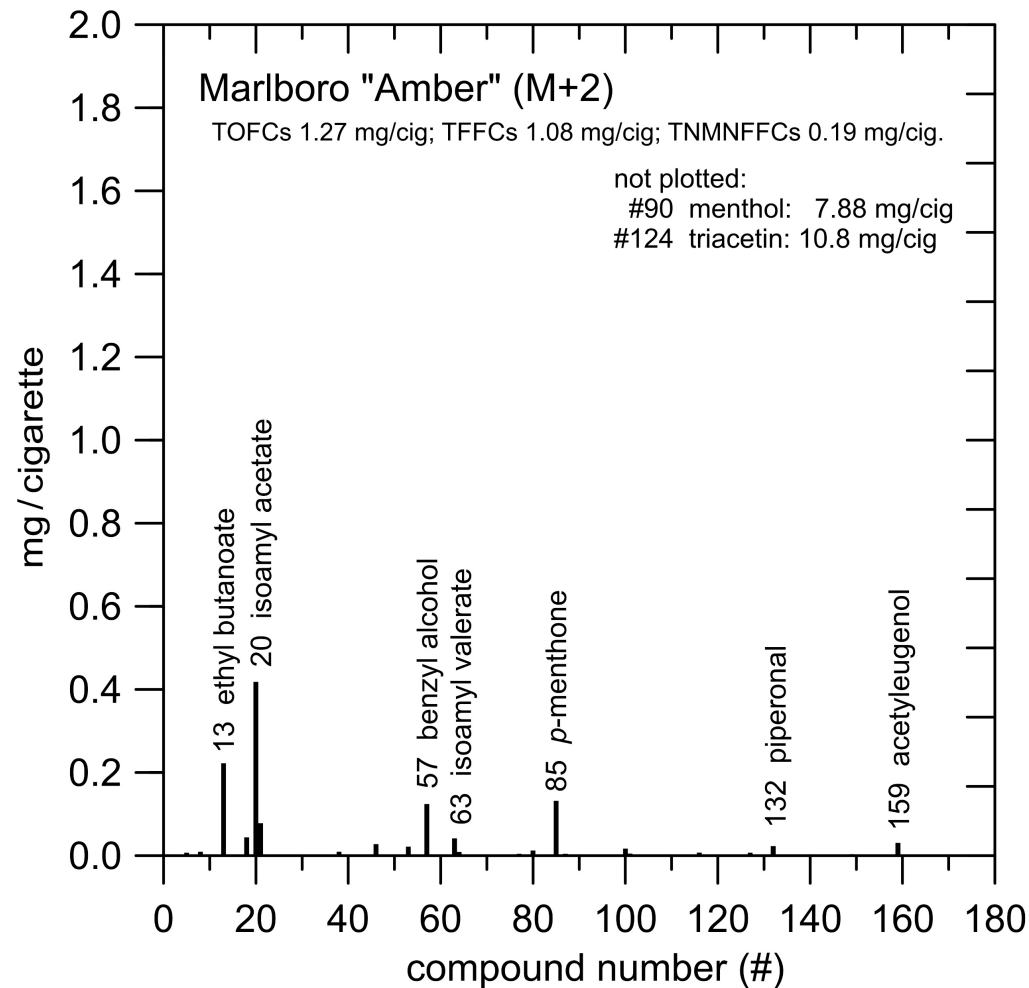

# Figure S9.a. Pack #9. Marlboro “Double Fusion Amber” (M+2) (Mexico)

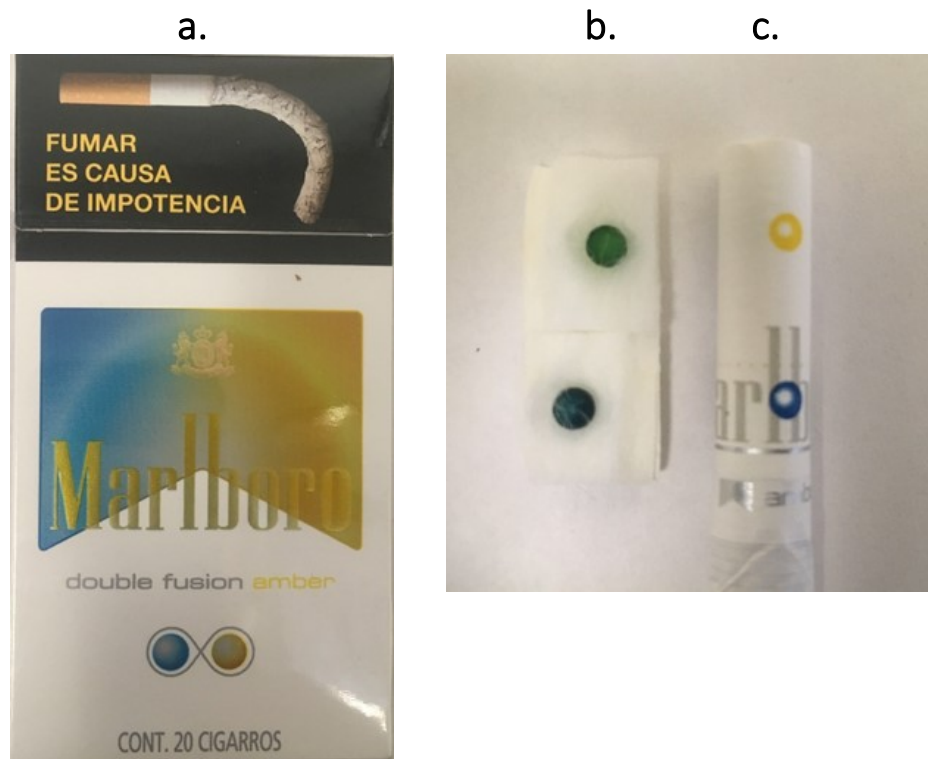

- a. Photo of pack (front);
- b. Opened filter showing two crushable flavor capsules (uncrushed);
- b. Filter end of cigarette.

Photos Copyright Portland State University, 2020.

Figure S9.b. Pack #9. Marlboro “Double Fusion Amber” (M+2)

TOFCs = total other flavour compounds; TFFCs = total fruit flavour compounds;  
TNMNFFCs = total non-menthol non-fruit flavour compounds.

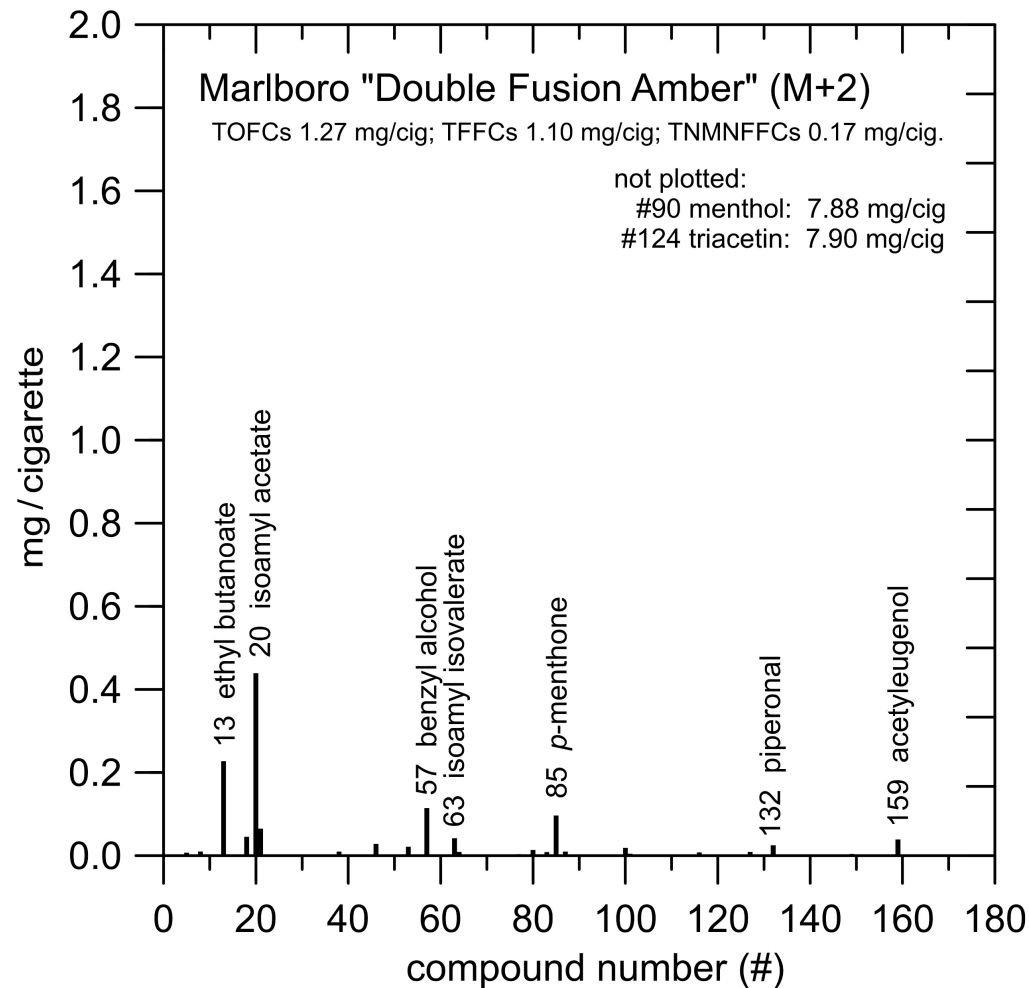

Figure S10.a. Pack #10. Pall Mall/XL “Mystery” (M+2)  
(Mexico)

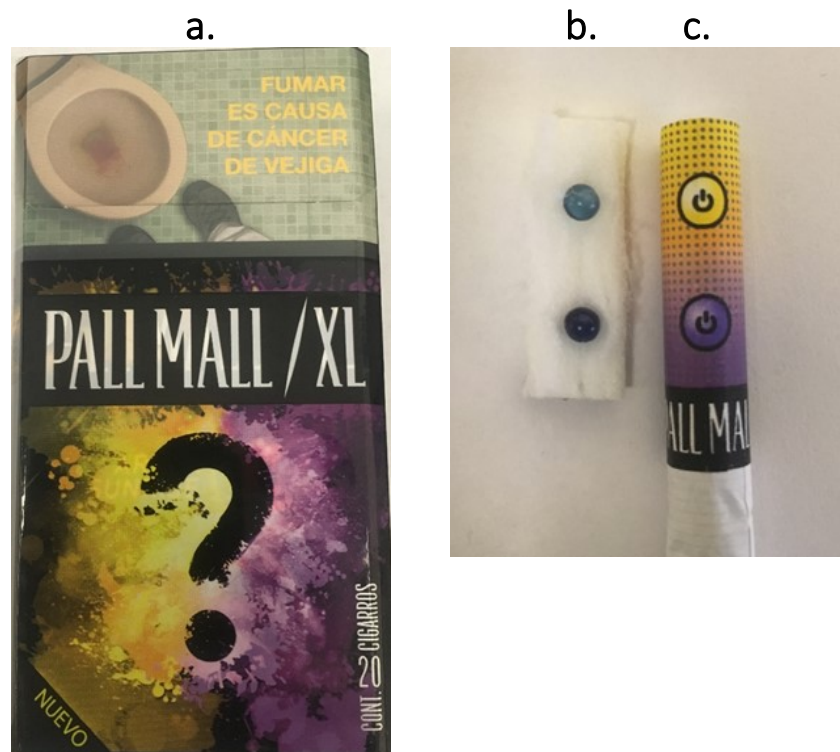

- a. Photo of pack (front);
- b. Opened filter showing two crushable flavor capsules (uncrushed);
- b. Filter end of cigarette.

Photos Copyright Portland State University, 2020.

Figure S10.b. Pack #10. Pall Mall/XL “Mystery” (M+2)

TOFCs = total other flavour compounds; TFFCs = total fruit flavour compounds;  
TNMNFFCs = total non-menthol non-fruit flavour compounds.

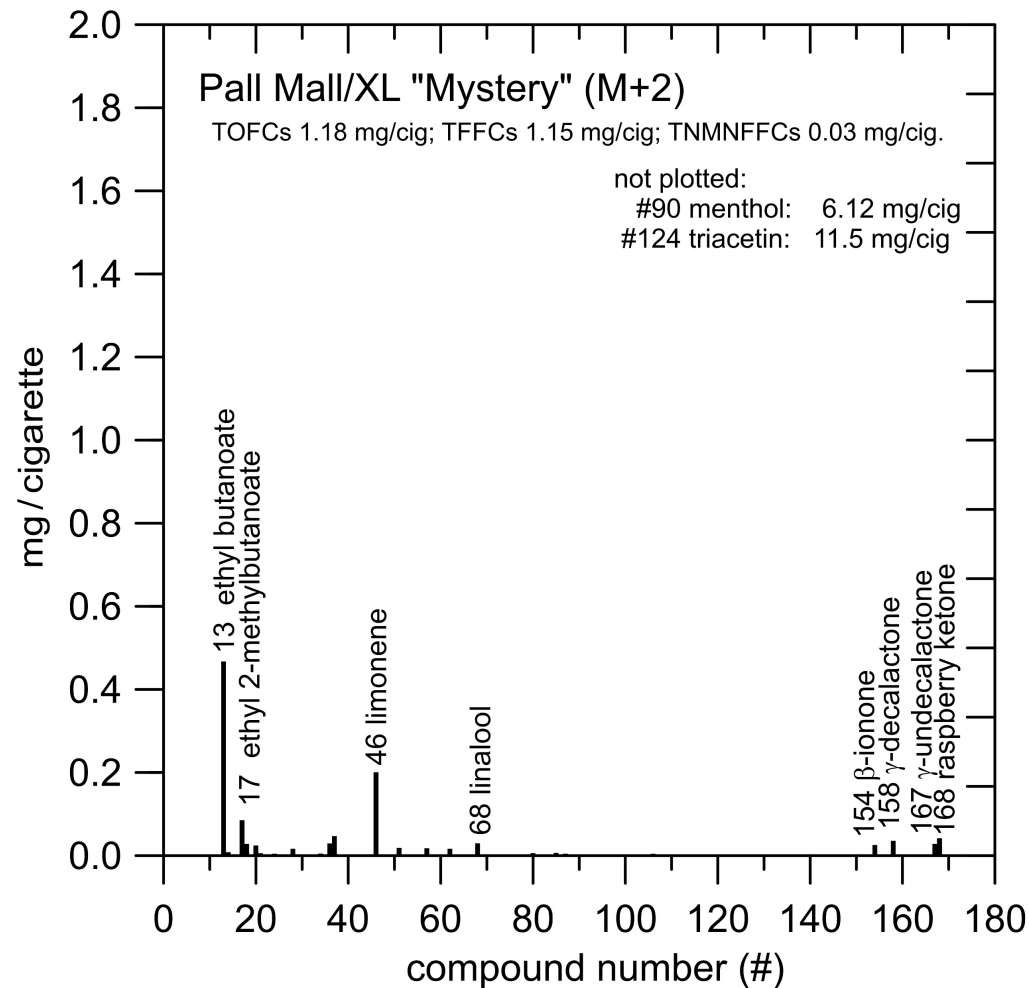

Figure S11.a. Pack #11. Marlboro “Capsula Fresca” (M+1) (Mexico)

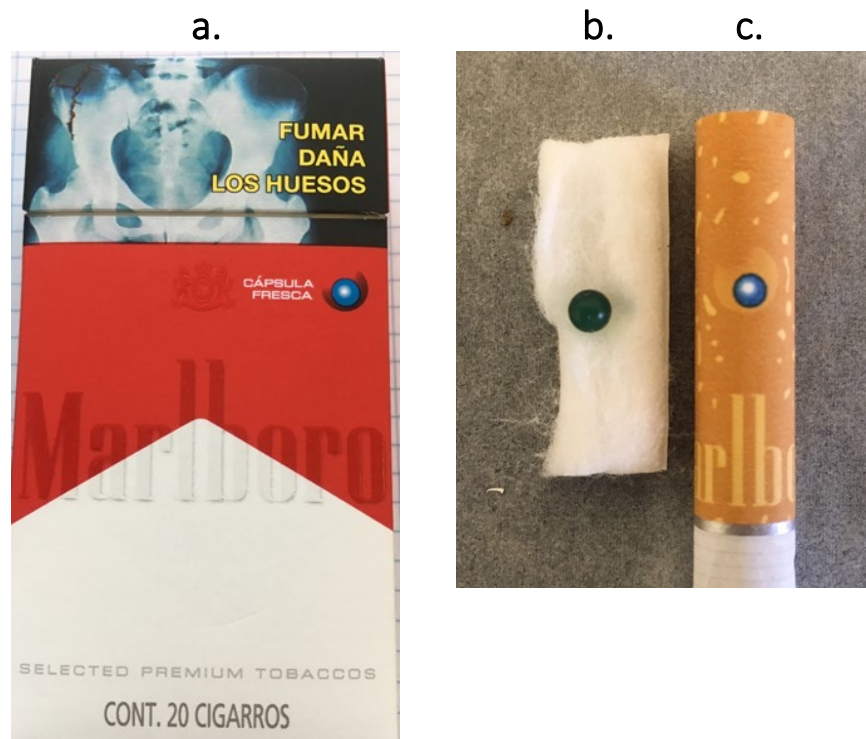

- a. Photo of pack (front);
- b. Opened filter showing one crushable flavor capsule (uncrushed);
- b. Filter end of cigarette.

Photos Copyright Portland State University, 2020.

Figure S11.b. Pack #11. Marlboro “Capsula Fresca” (M+1)

TOFCs = total other flavour compounds; TFFCs = total fruit flavour compounds;  
TNMNFFCs = total non-menthol non-fruit flavour compounds.

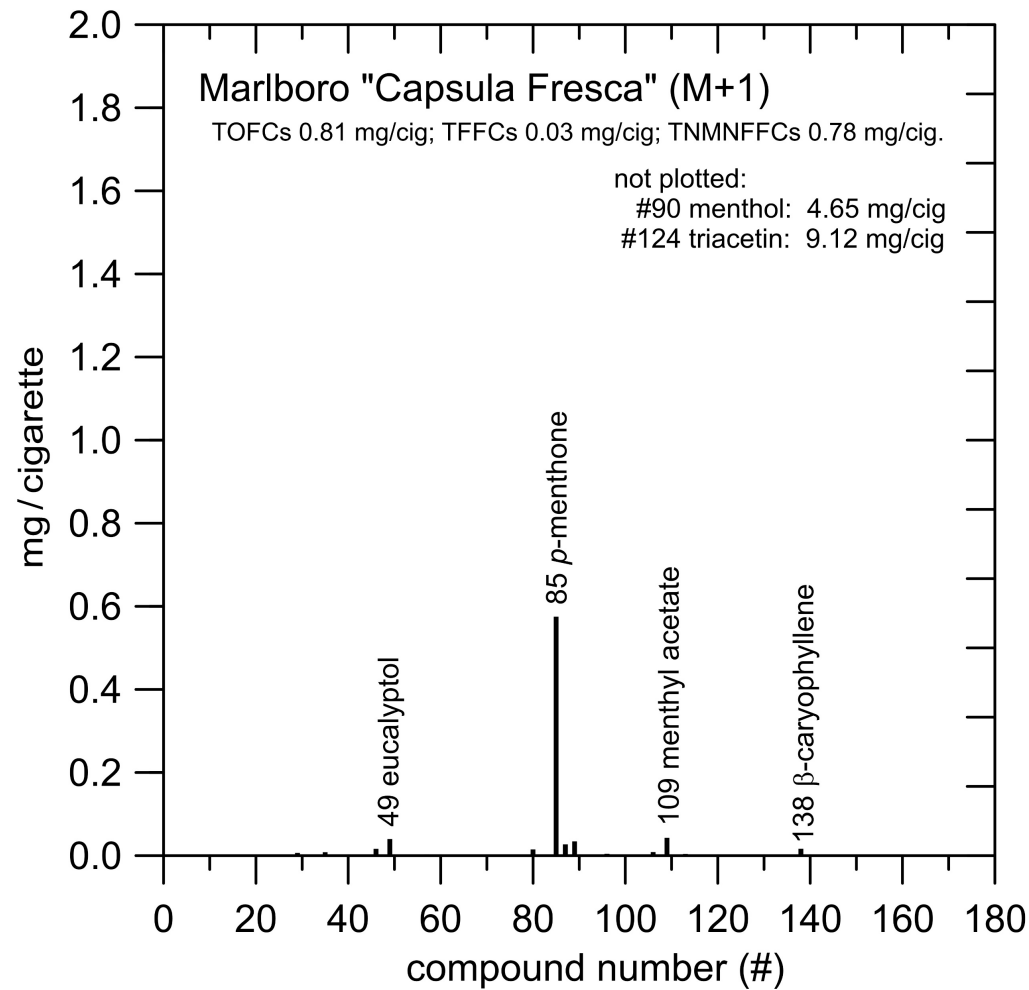

Figure S12.a. Pack #12. Lucky Strike “Convertibles” purple (M+1) (Mexico)

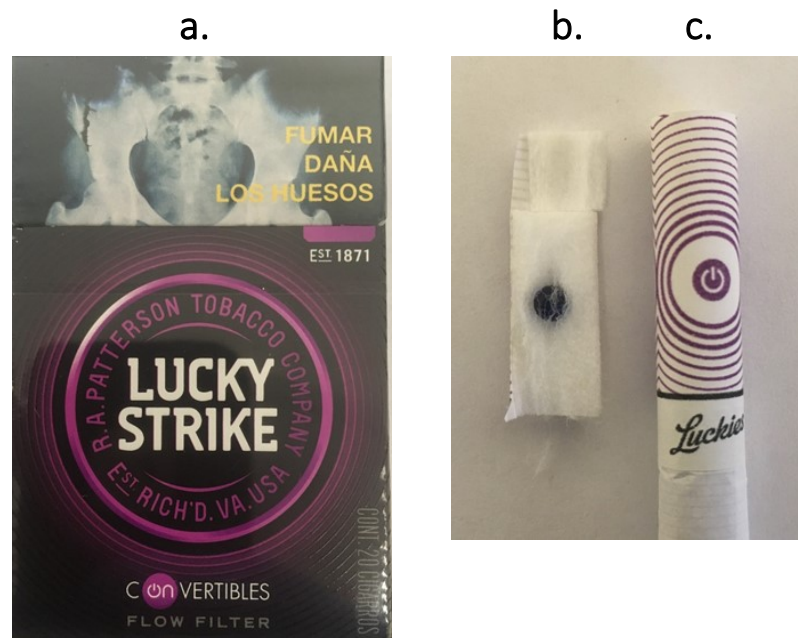

- a. Photo of pack (front);
- b. Opened filter showing one crushable flavor capsule (uncrushed);
- b. Filter end of cigarette.

Photos Copyright Portland State University, 2020.

Figure S12.b. Pack #12. Lucky Strike “Convertibles” purple (M+1)

TOFCs = total other flavour compounds; TFFCs = total fruit flavour compounds;  
TNMNFFCs = total non-menthol non-fruit flavour compounds.

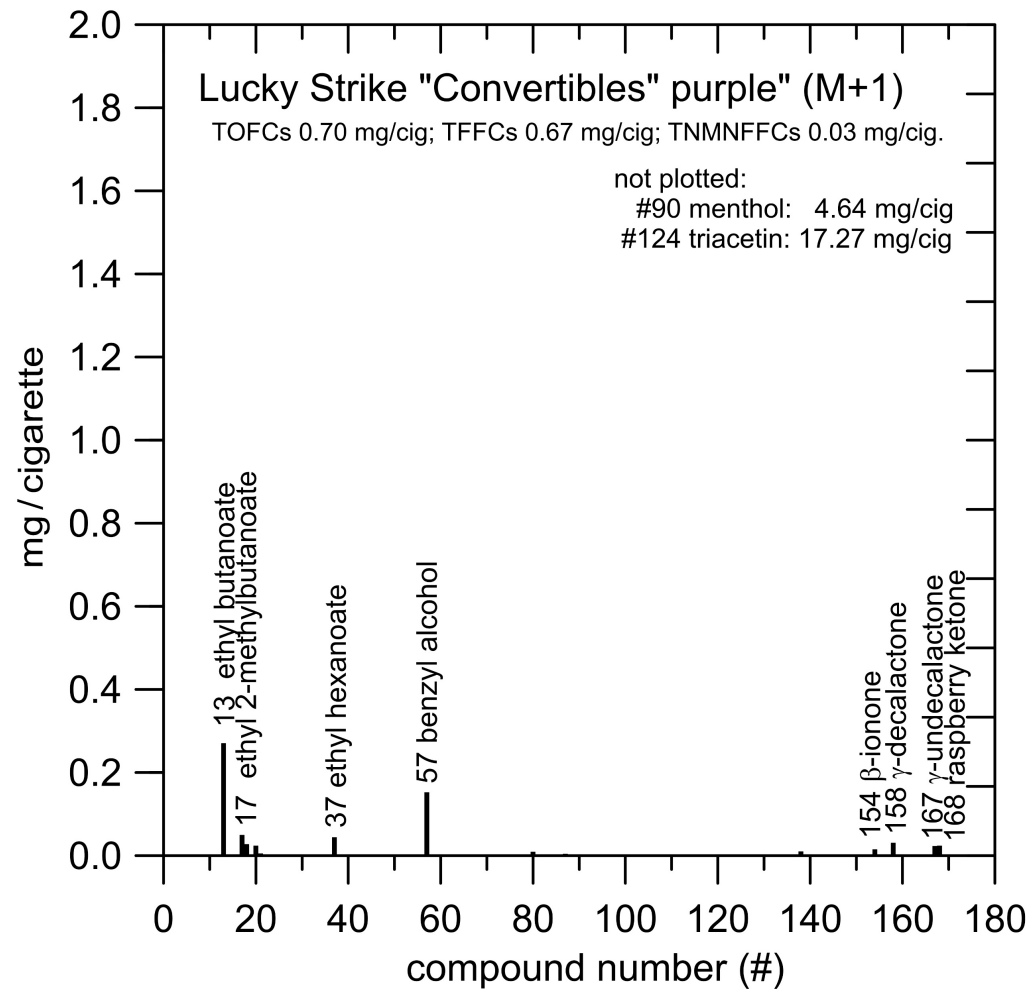

Figure S13.a. Pack #13. Pall Mall/XL “Tokyo Midnight” (M+1) (Mexico)

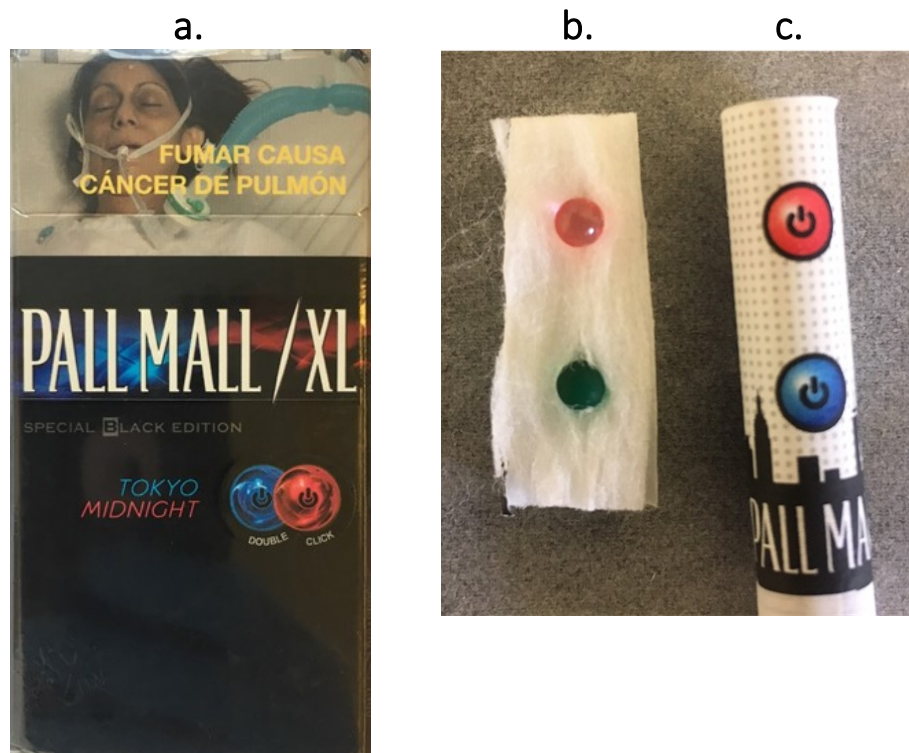

- a. Photo of pack (front);
- b. Opened filter showing two crushable flavor capsules (uncrushed);
- b. Filter end of cigarette.

Photos Copyright Portland State University, 2020.

Figure S13.b. Pack #13. Pall Mall/XL “Tokyo Midnight” (M+1)

TOFCs = total other flavour compounds; TFFCs = total fruit flavour compounds;  
TNMNFFCs = total non-menthol non-fruit flavour compounds.

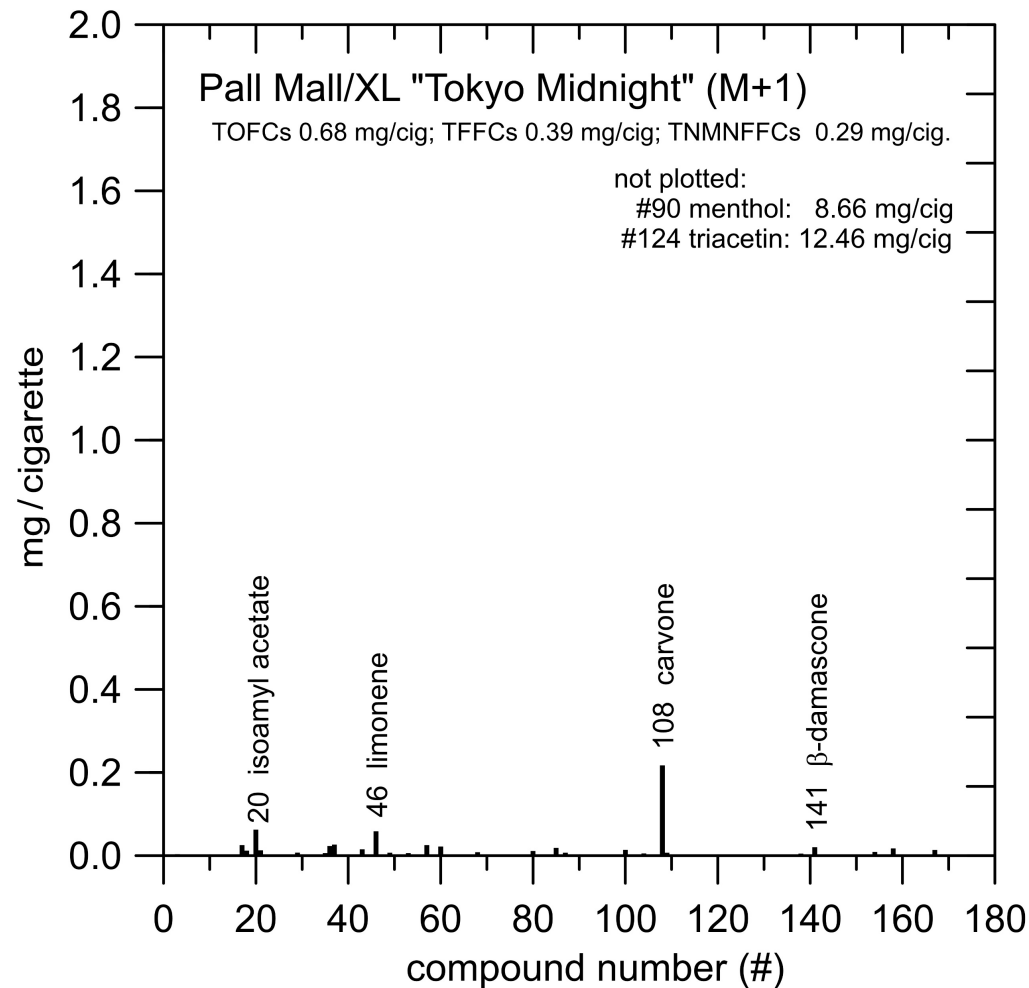

Figure S14.a. Pack #14. Marlboro “Ruby Fusion Blast” (M+1) (Mexico)

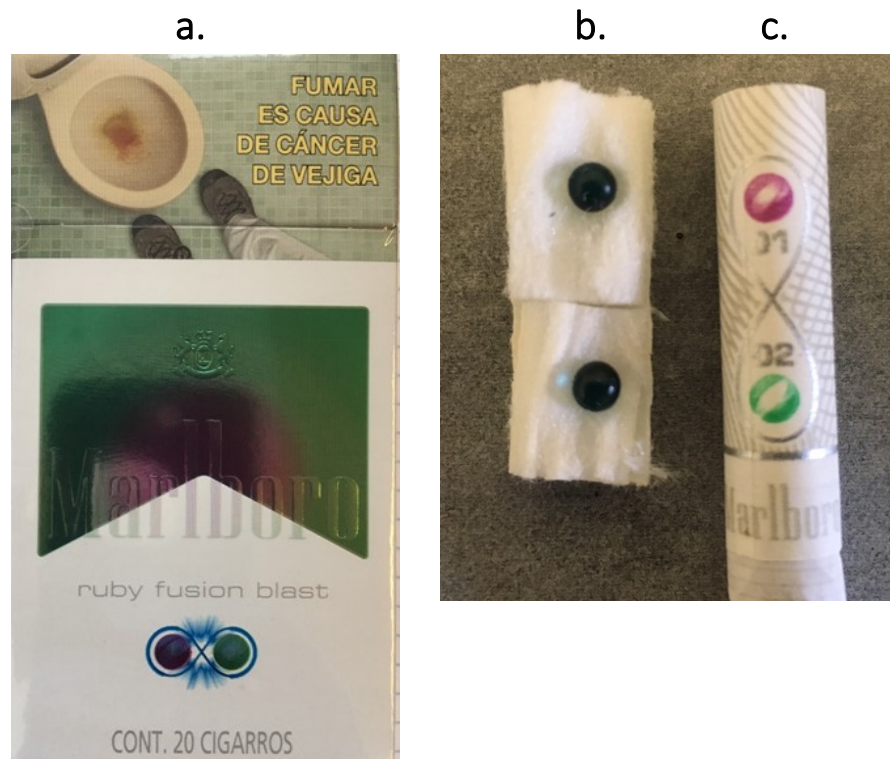

- a. Photo of pack (front);
- b. Opened filter showing two crushable flavor capsules (uncrushed);
- b. Filter end of cigarette.

Photos Copyright Portland State University, 2020.

Figure S14.b. Pack #14. Marlboro “Ruby Fusion Blast” (M+1)

TOFCs = total other flavour compounds; TFFCs = total fruit flavour compounds;  
TNMNFFCs = total non-menthol non-fruit flavour compounds.

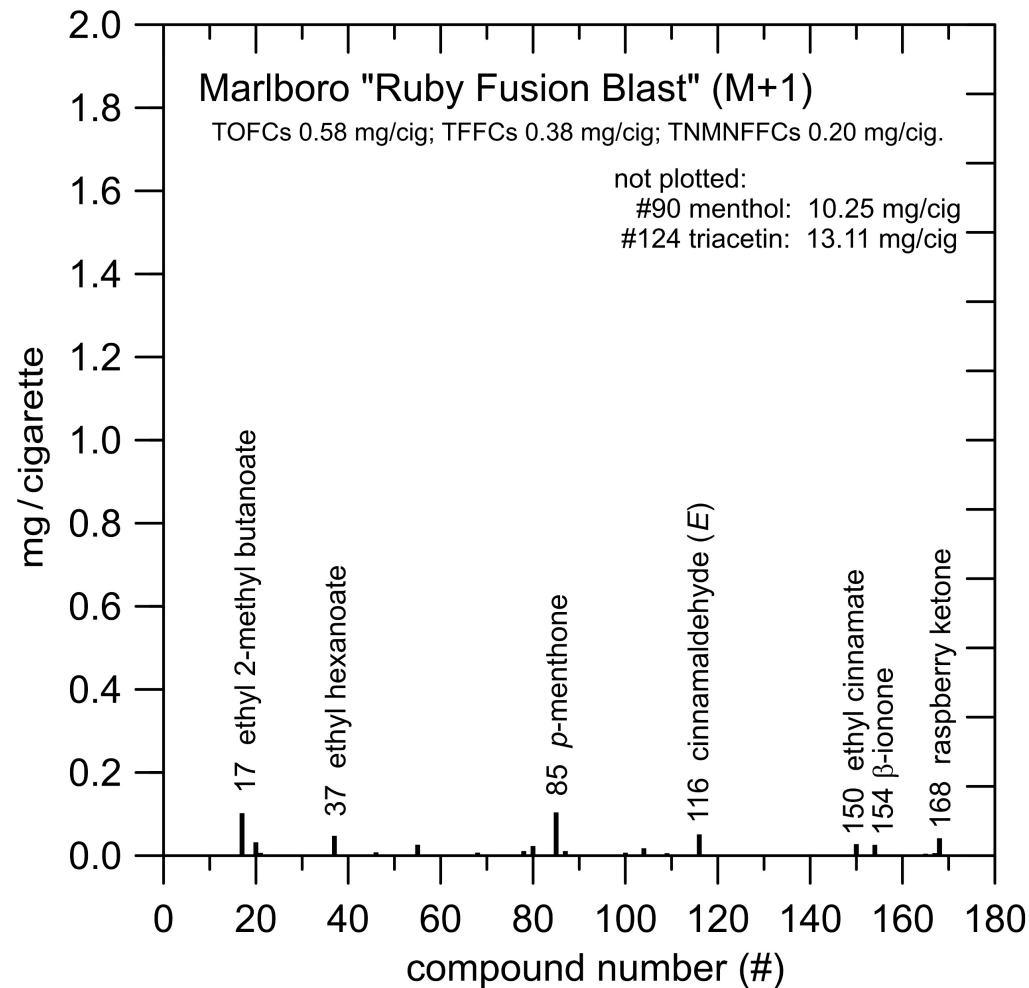

# Figure S15.a. Pack #15. Pall Mall/XL “Black Edition Maui Crepuscule” (M+1) (Mexico)

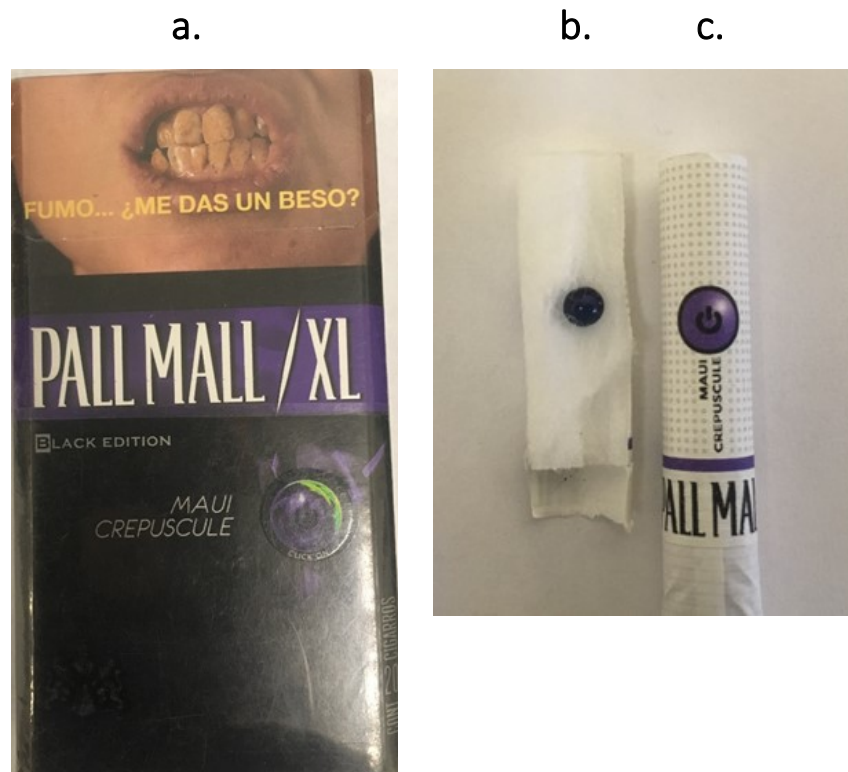

- a. Photo of pack (front);
- b. Opened filter showing one crushable flavor capsule (uncrushed);
- b. Filter end of cigarette.

Photos Copyright Portland State University, 2020.

Figure S15.b. Pack #15. Pall Mall/XL “Black Edition Maui Crepuscule” (M+1)  
TOFCs = total other flavour compounds; TFFCs = total fruit flavour compounds;  
TNMNFFCs = total non-menthol non-fruit flavour compounds.

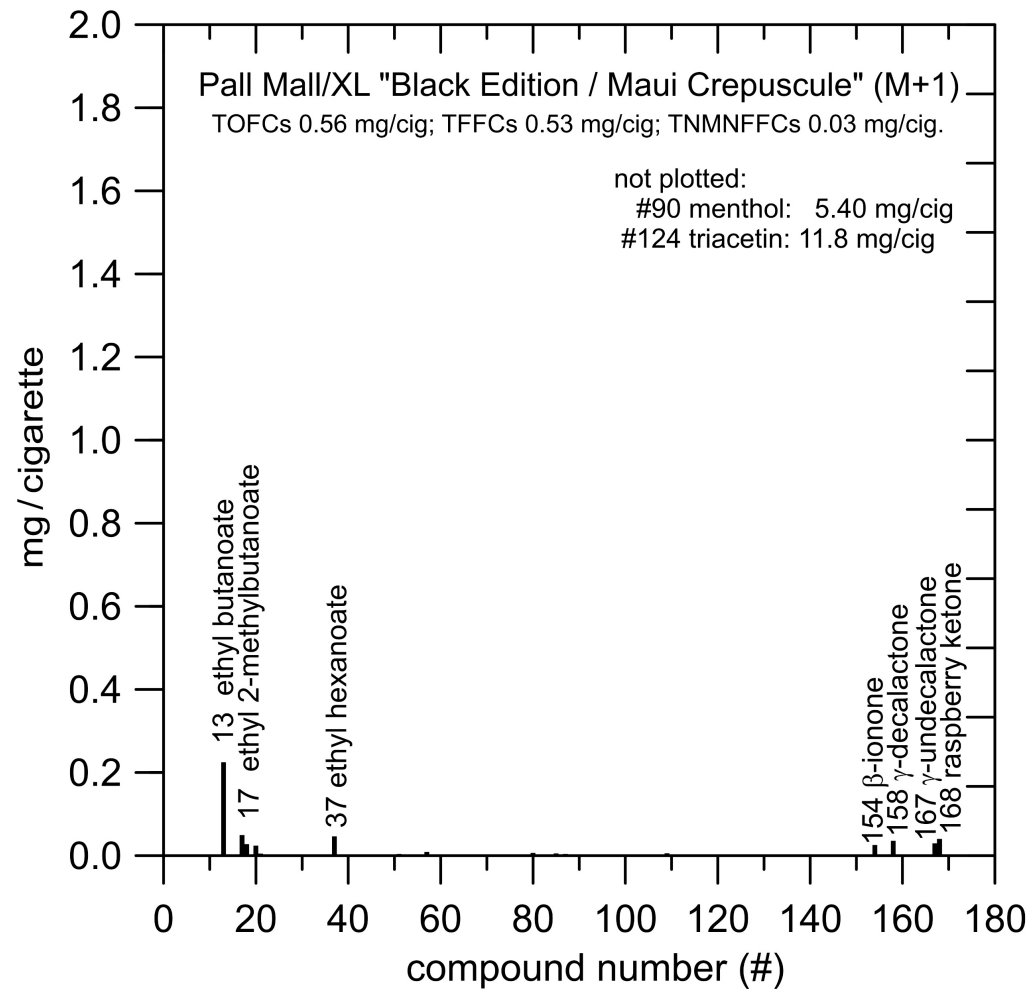

# Figure S16.a. Pack #16. Marlboro “Double Fusion Ruby” (M+1) (Mexico)

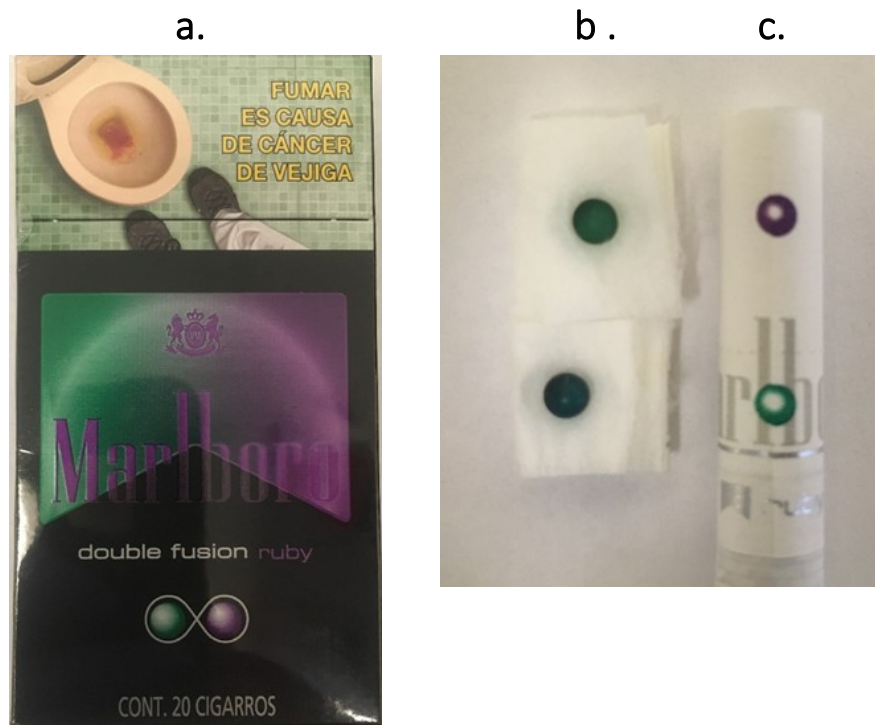

- a. Photo of pack (front);
- b. Opened filter showing two crushable flavor capsules (uncrushed);
- b. Filter end of cigarette.

Photos Copyright Portland State University, 2020.

Figure S16.b. Pack #16. Marlboro “Double Fusion Ruby” (M+1)

TOFCs = total other flavour compounds; TFFCs = total fruit flavour compounds;  
TNMNFFCs = total non-menthol non-fruit flavour compounds.

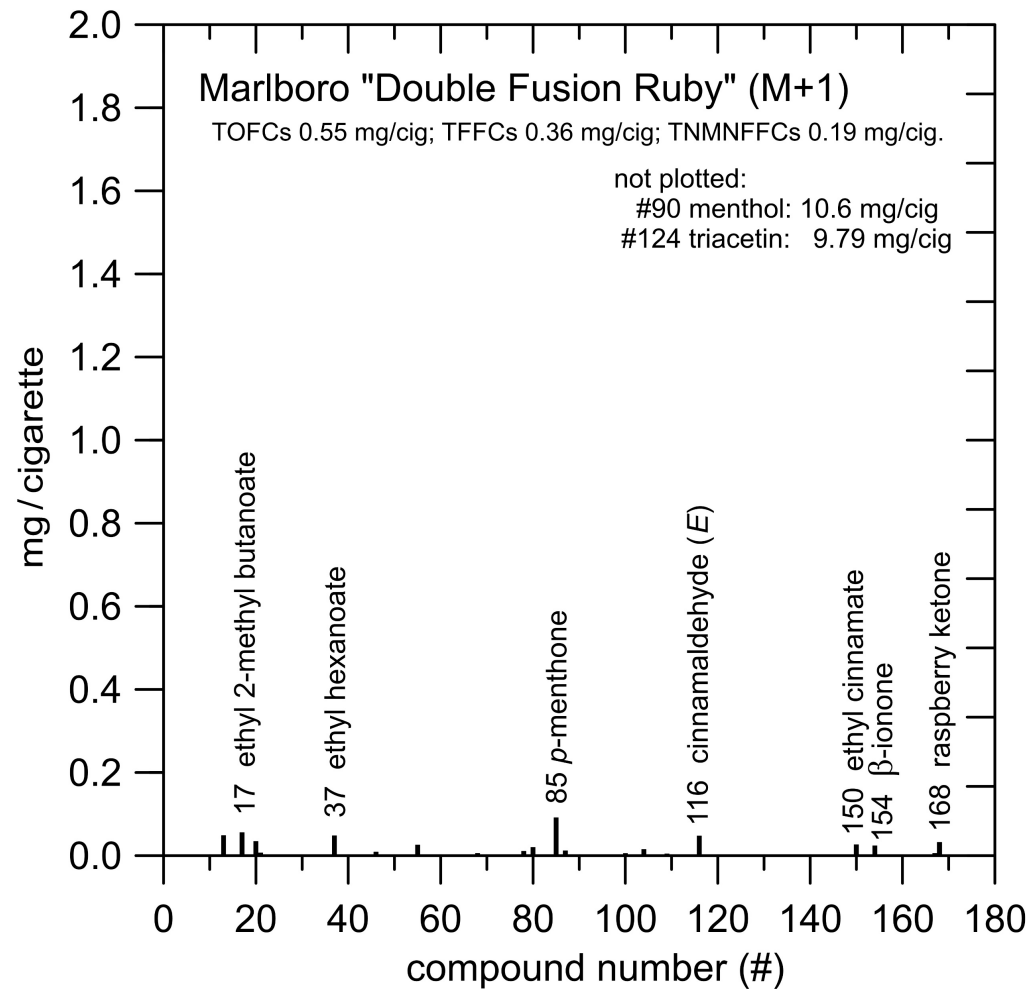

# Figure S17.a. Pack #17. Chesterfield “Caps Purple” (M+1) (Mexico)

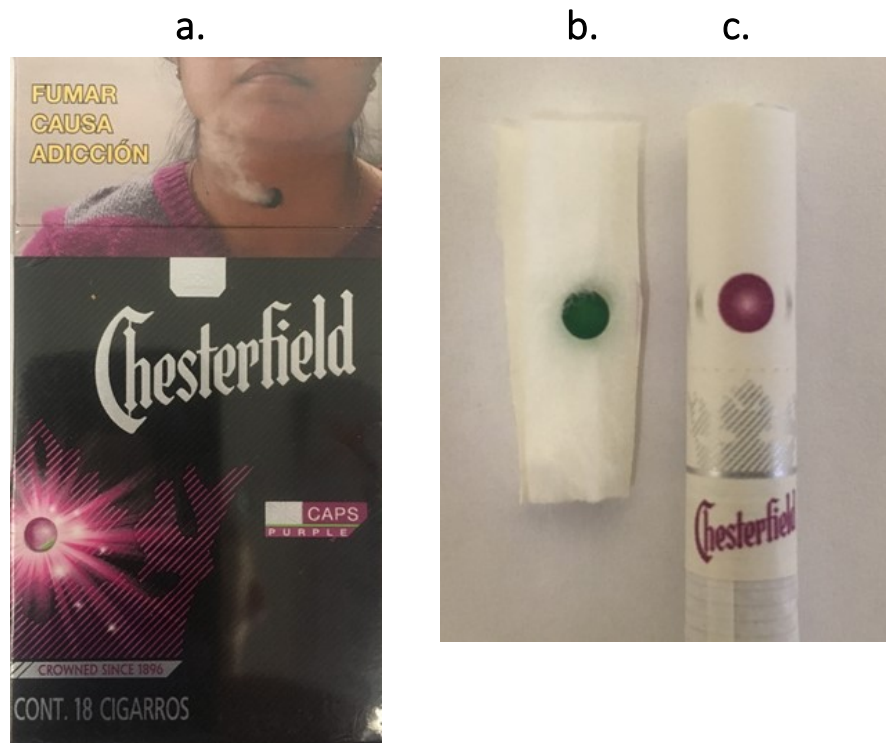

- a. Photo of pack (front);
- b. Opened filter showing one crushable flavor capsule (uncrushed);
- b. Filter end of cigarette.

Photos Copyright Portland State University, 2020.

Figure S17.b. Pack #17. Chesterfield “Caps Purple” (M+1)

TOFCs = total other flavour compounds; TFFCs = total fruit flavour compounds;  
TNMNFFCs = total non-menthol non-fruit flavour compounds.

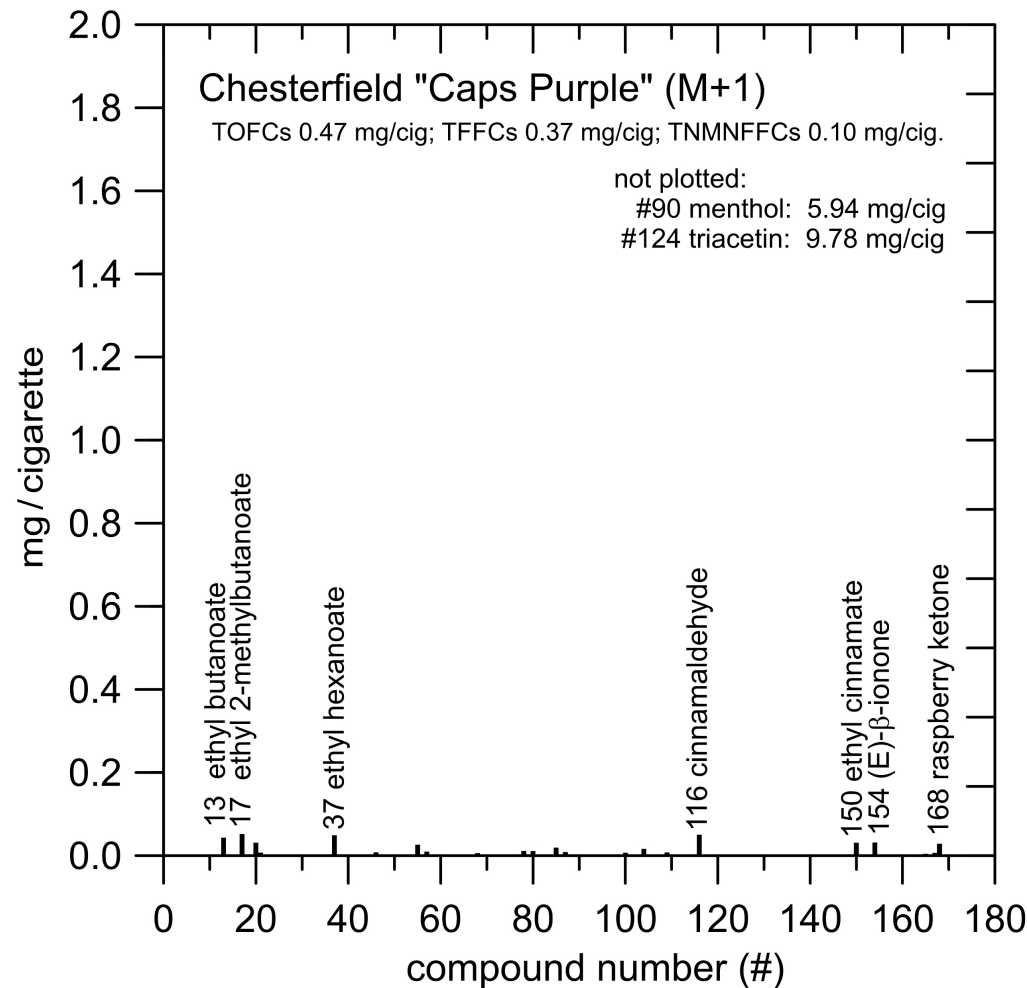

# Figure S18.a. Pack #18. Benson & Hedges “Crystal Violet” (M+1) (Mexico)

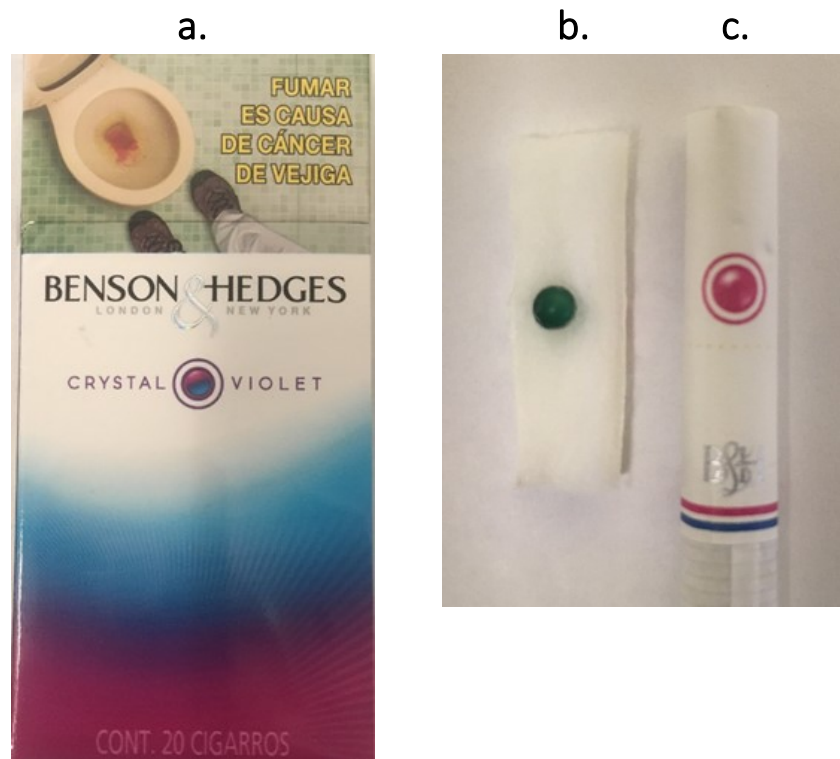

- a. Photo of pack (front);
- b. Opened filter showing one crushable flavor capsule (uncrushed);
- b. Filter end of cigarette.

Photos Copyright Portland State University, 2020.

Figure S18.b. Pack #18. Benson & Hedges “Crystal Violet” (M+1)

TOFCs = total other flavour compounds; TFFCs = total fruit flavour compounds;  
TNMNFFCs = total non-menthol non-fruit flavour compounds.

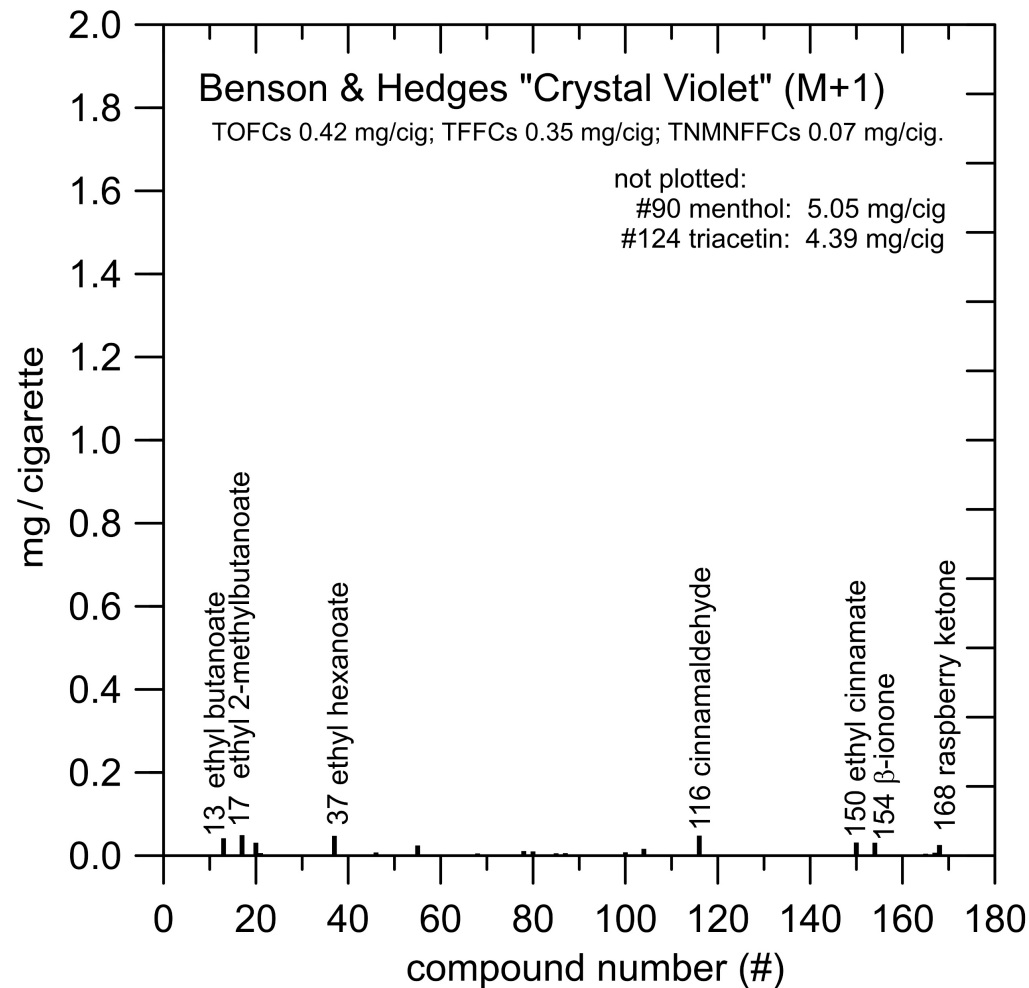

Figure S19.a. Pack #19. Pall Mall/XL “Black Edition Ibiza Sunset” (M+1) (Mexico)

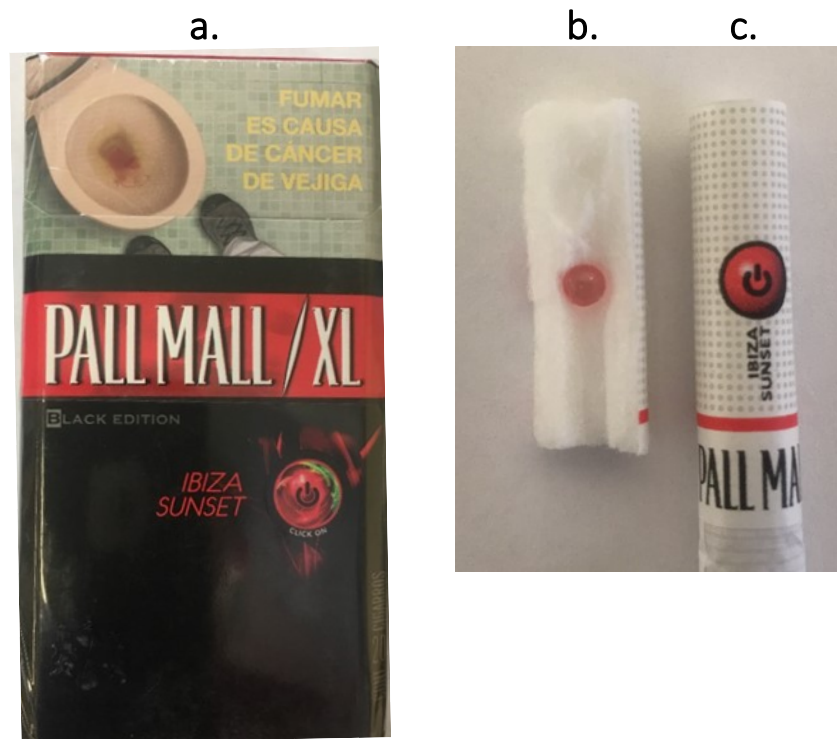

- a. Photo of pack (front);
- b. Opened filter showing one crushable flavor capsule (uncrushed);
- b. Filter end of cigarette.

Photos Copyright Portland State University, 2020.

Figure S19.b. Pack #19. Pall Mall/XL “Black Edition Ibiza Sunset” (M+1)

TOFCs = total other flavour compounds; TFFCs = total fruit flavour compounds;  
TNMNFFCs = total non-menthol non-fruit flavour compounds.

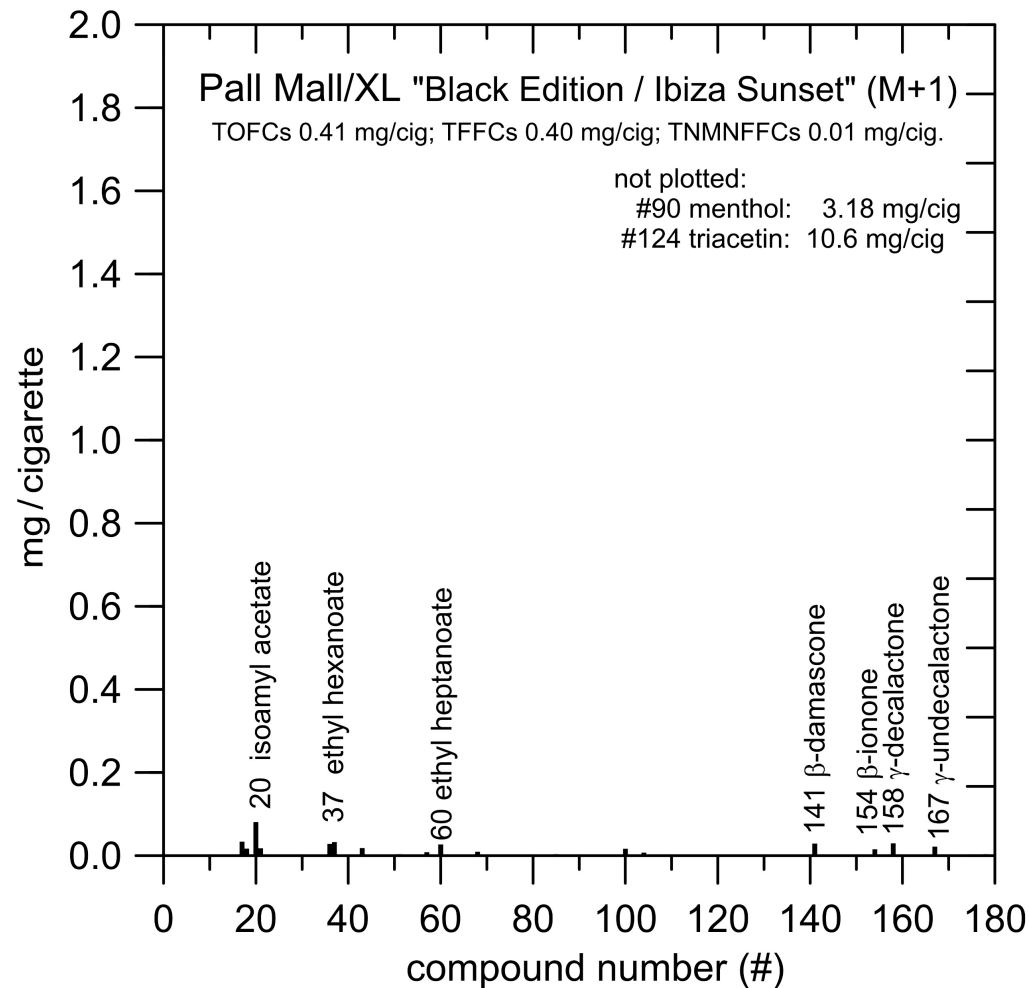

Figure S20.a. Pack #20. Pall Mall “Wave” (M+1)  
(Mexico)

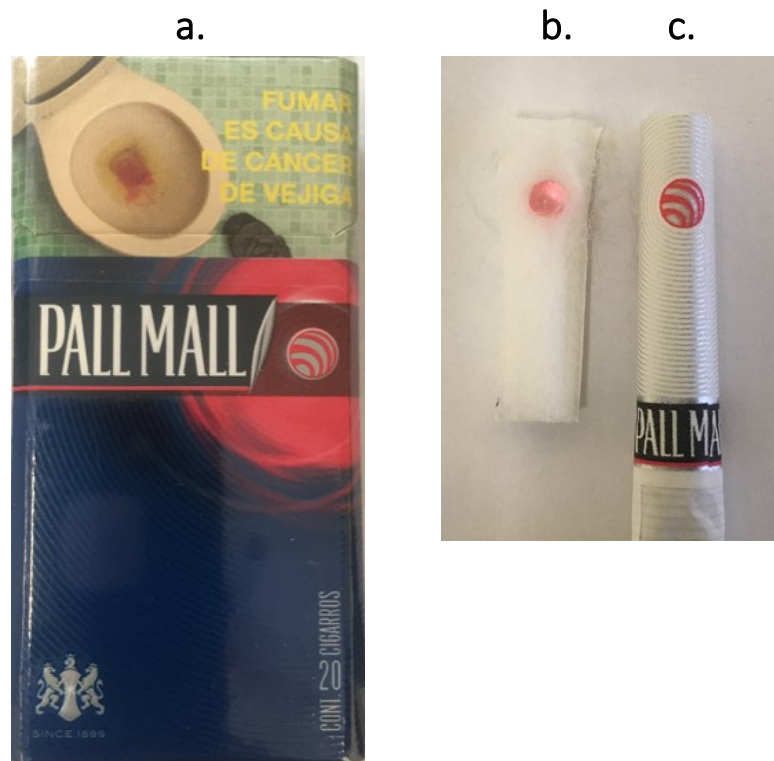

- a. Photo of pack (front);
- b. Opened filter showing one crushable flavor capsule (uncrushed);
- b. Filter end of cigarette.

Photos Copyright Portland State University, 2020.

Figure S20.b. Pack #20. Pall Mall “Wave” (M+1)

TOFCs = total other flavour compounds; TFFCs = total fruit flavour compounds;  
TNMNFFCs = total non-menthol non-fruit flavour compounds.

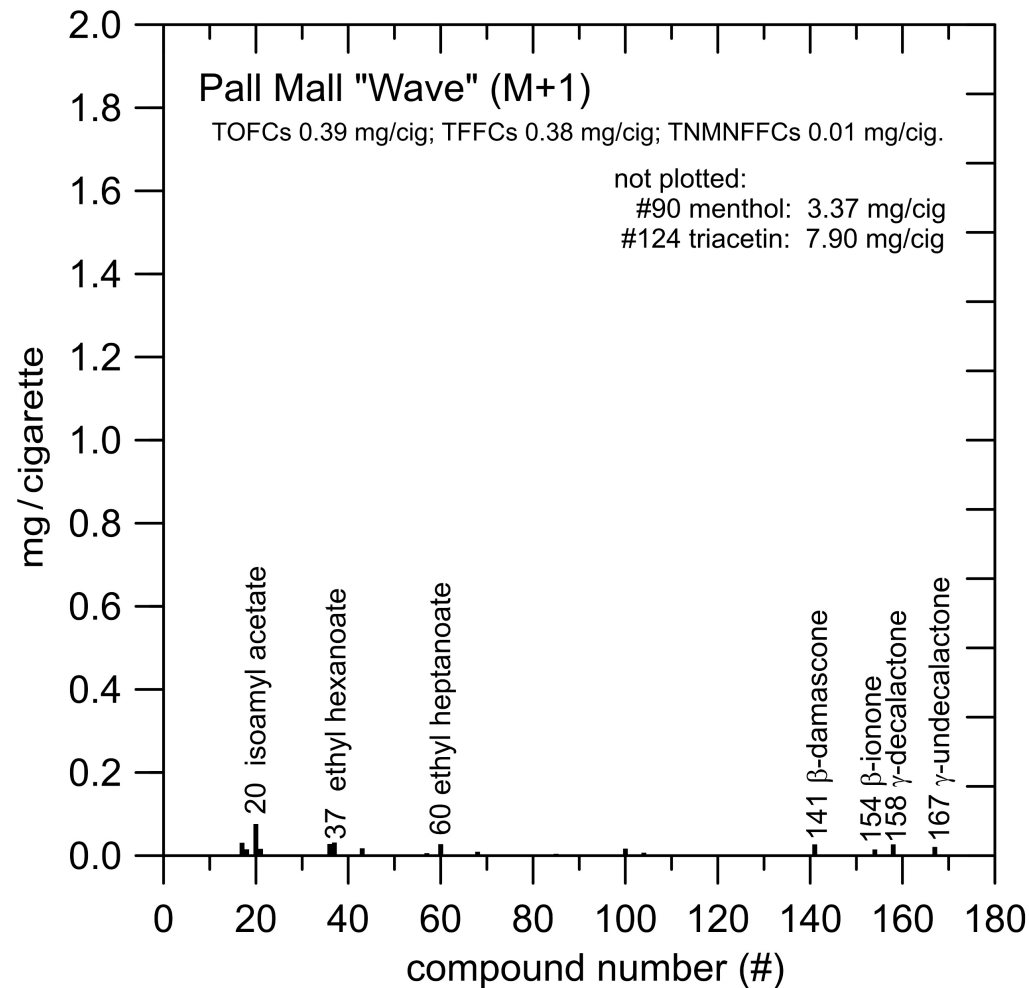

# Figure S21.a. Pack #21. Pall Mall/XL “Mykonos Nightfall” (M+1) (Mexico)

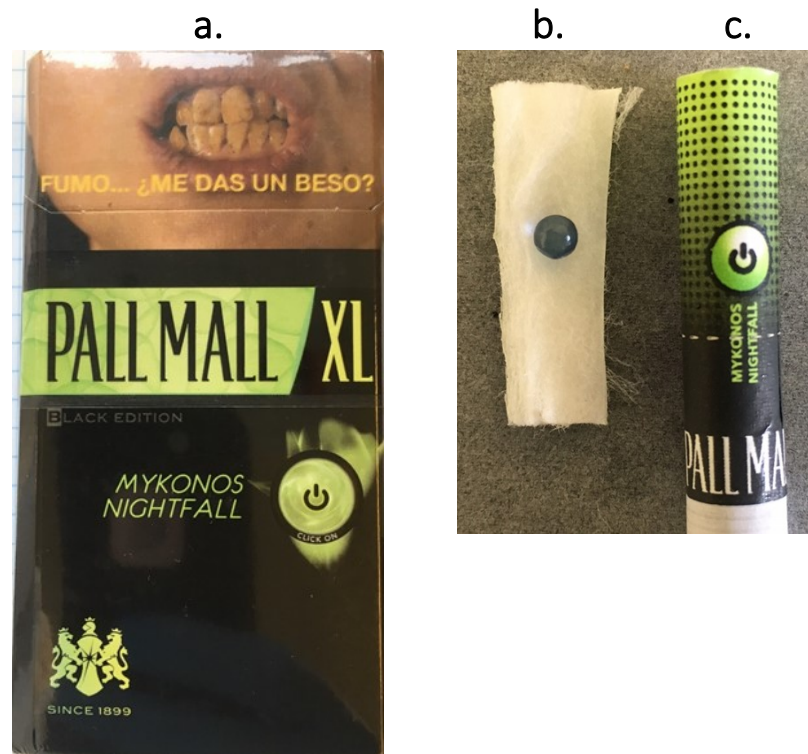

- a. Photo of pack (front);
- b. Opened filter showing one crushable flavor capsule (uncrushed);
- b. Filter end of cigarette.

Photos Copyright Portland State University, 2020.

## Figure S21.b. Pack #21. Pall Mall/XL "Mykonos Nightfall" (M+1)

TOFCs = total other flavour compounds; TFFCs = total fruit flavour compounds;  
TNMNFFCs = total non-menthol non-fruit flavour compounds.

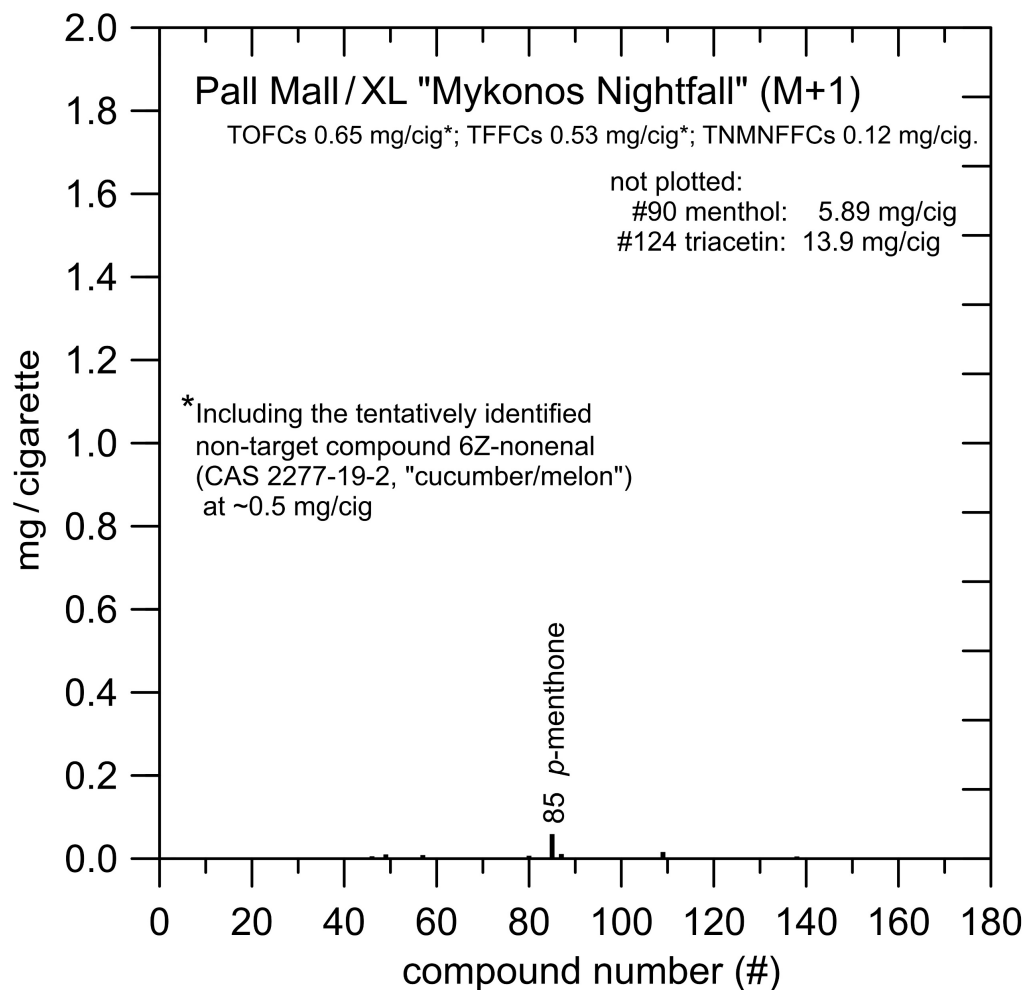

## Figure S22.a. Pack #22. Benson & Hedges “Crystal Blue” (M) (Mexico)

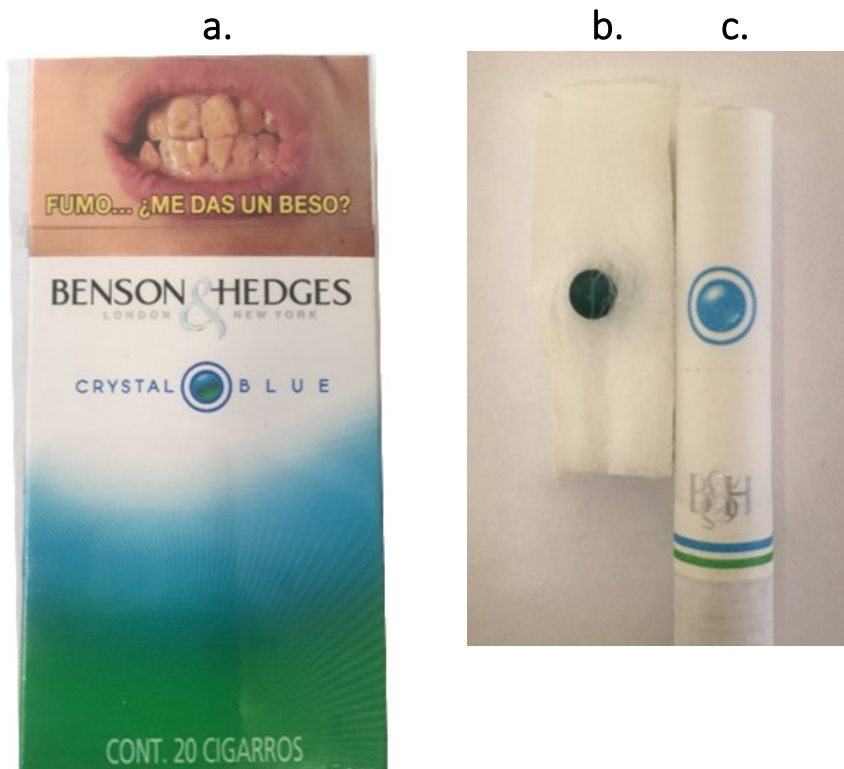

- a. Photo of pack (front);
- b. Opened filter showing one crushable flavor capsule (uncrushed);
- b. Filter end of cigarette.

Photos Copyright Portland State University, 2020.

Figure S22.b. Pack #22. Benson & Hedges “Crystal Blue” (M)

TOFCs = total other flavour compounds; TFFCs = total fruit flavour compounds;  
TNMNFFCs = total non-menthol non-fruit flavour compounds.

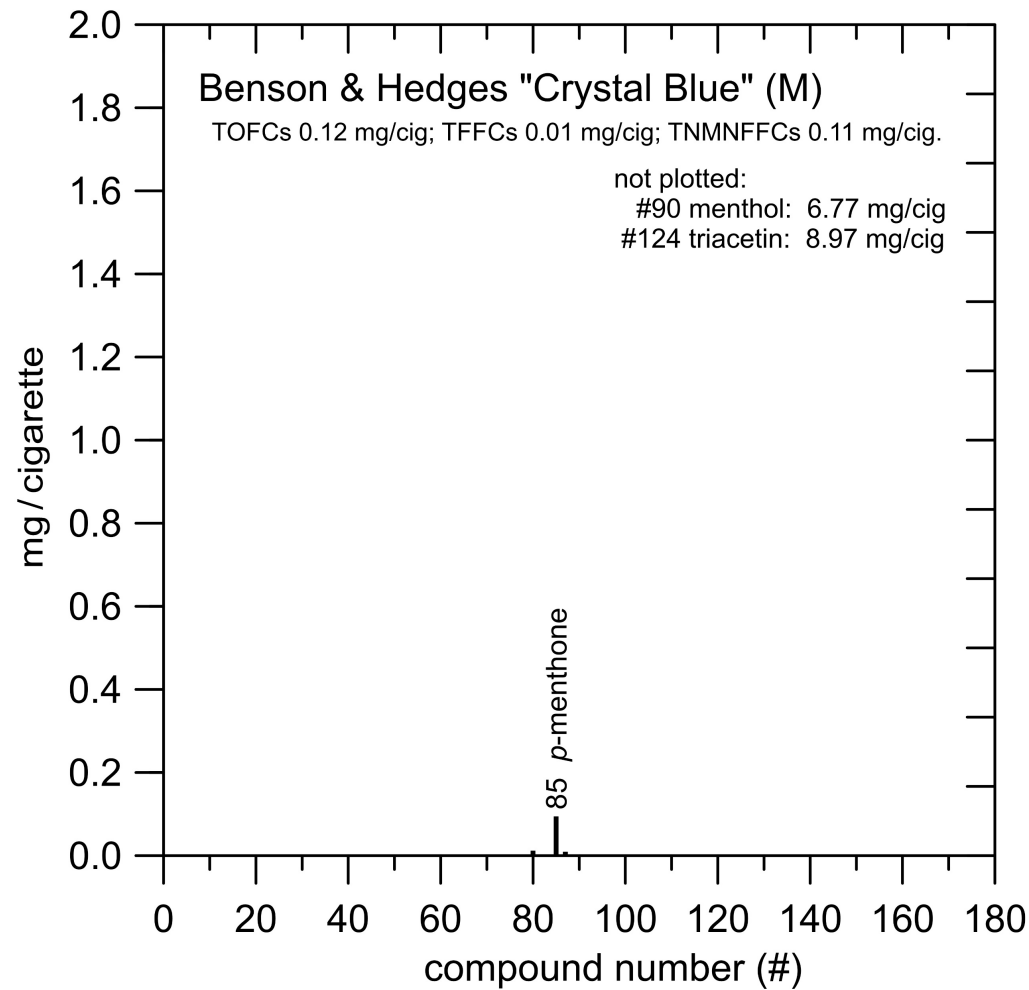

Figure S23.a. Pack #23. Next “Green” (NF)  
(Canada)

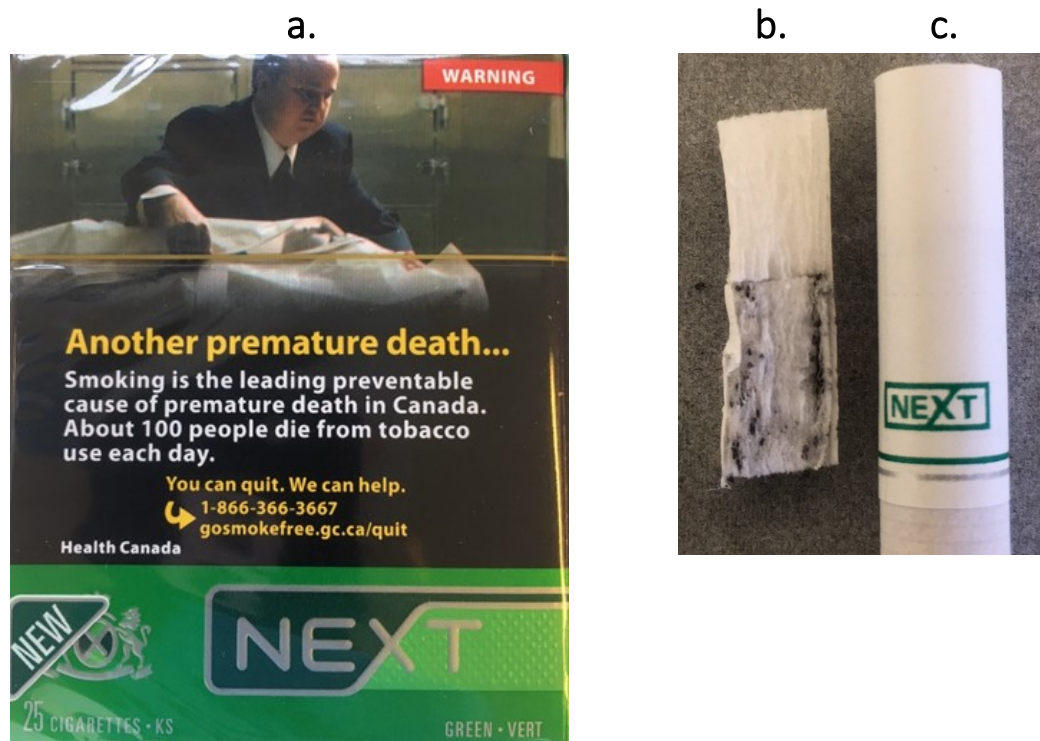

- a. Photo of pack (front);
- b. Opened filter showing a black powder (likely activated charcoal);
- b. Filter end of cigarette.

Photos Copyright Portland State University, 2020.

Figure S23.b. Pack #23. Next “Green” (NF)

TOFCs = total other flavour compounds; TFFCs = total fruit flavour compounds;  
TNMNFFCs = total non-menthol non-fruit flavour compounds.

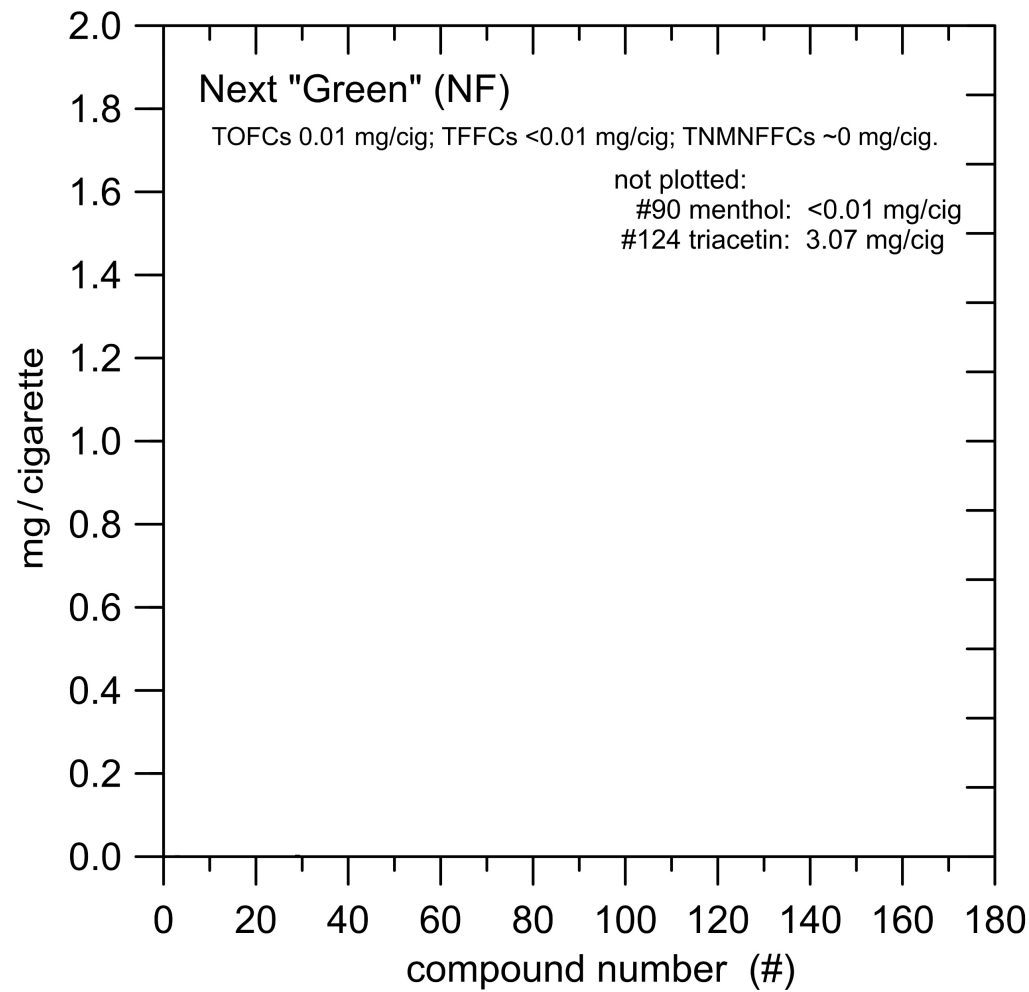

## Figure S24.a. Pack #24. John Player “Choice” (NF) (Canada)

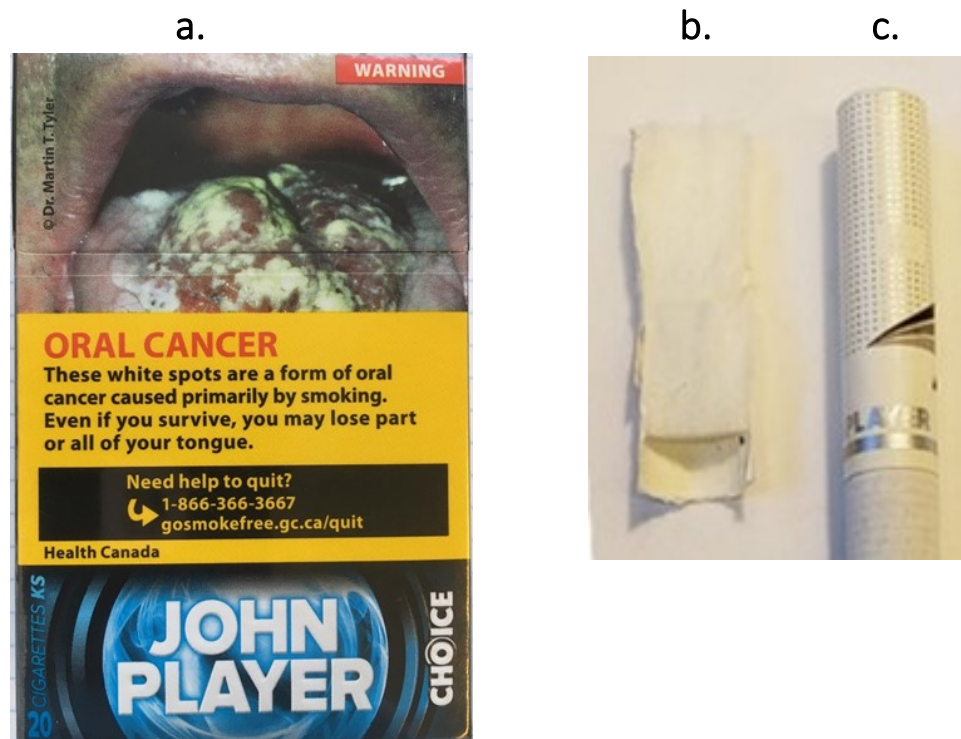

- a. Photo of pack (front);
- b. Opened filter;
- b. Filter end of cigarette.

Photos Copyright Portland State University, 2020.

Figure S24.b. Pack #24. John Player “Choice” (NF)

TOFCs = total other flavour compounds; TFFCs = total fruit flavour compounds;  
TNMNFFCs = total non-menthol non-fruit flavour compounds.

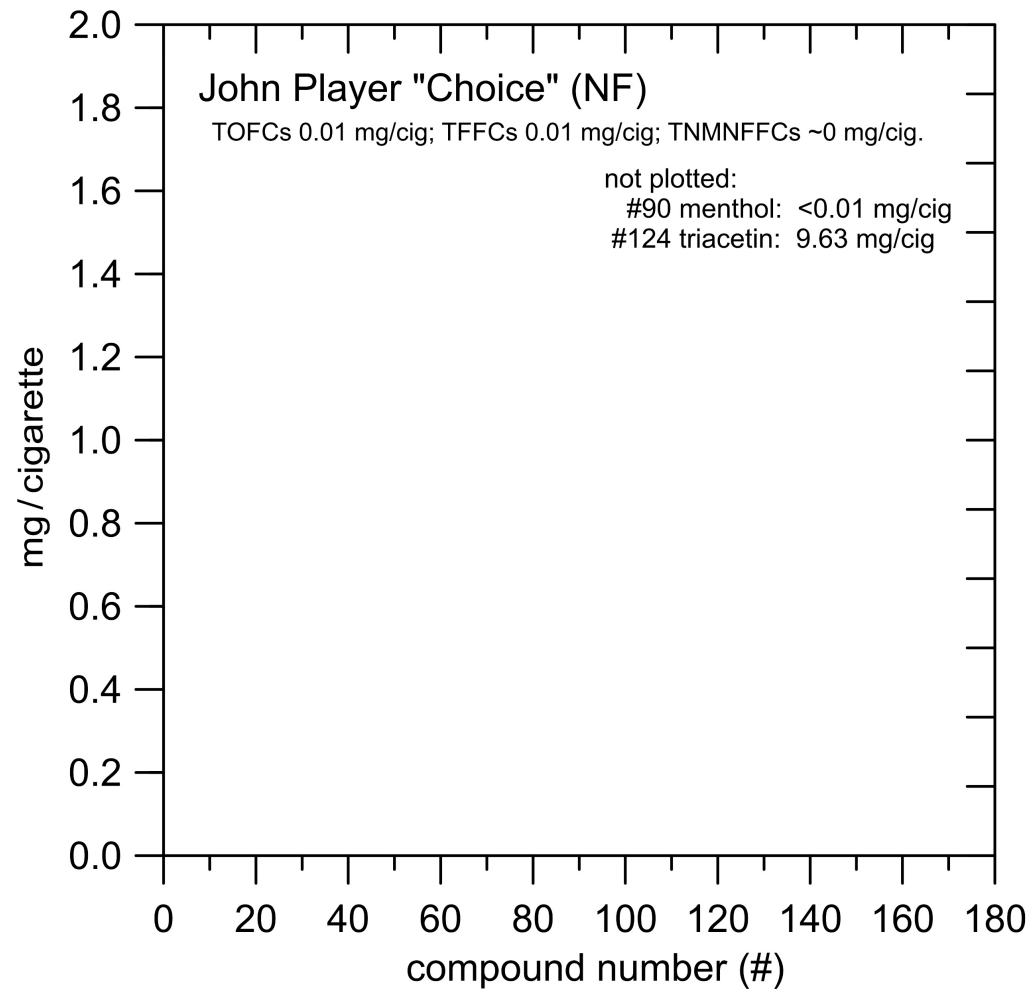

## Figure S25.a. Pack #25. Benson & Hedges “Unison” (NF) (Canada)

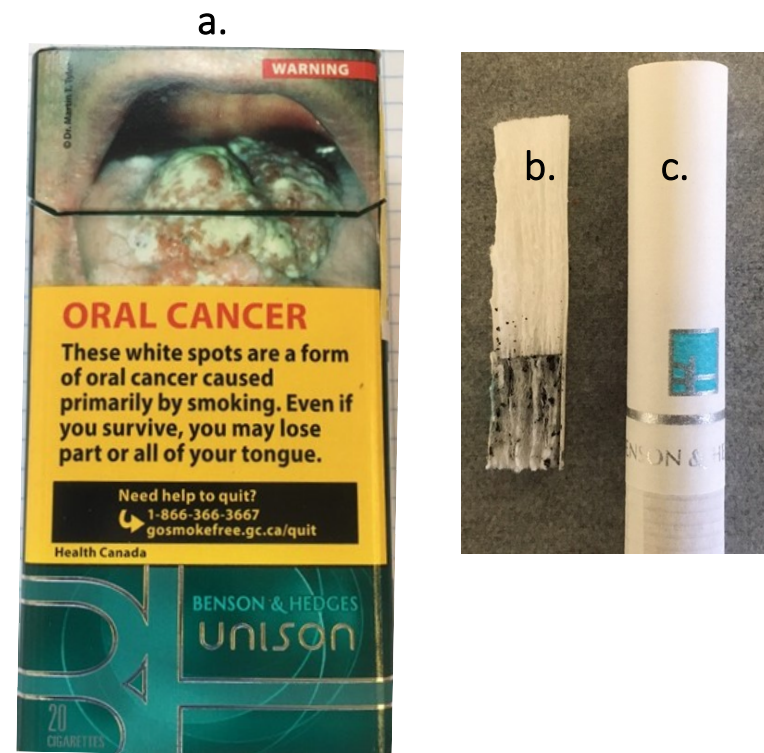

- a. Photo of pack (front);
- b. Opened filter showing a black powder (likely activated charcoal);
- b. Filter end of cigarette.

Photos Copyright Portland State University, 2020.

## Figure S25.b. Pack #25. Benson & Hedges "Unison" (NF)

TOFCs = total other flavour compounds; TFFCs = total fruit flavour compounds;  
TNMNFFCs = total non-menthol non-fruit flavour compounds.

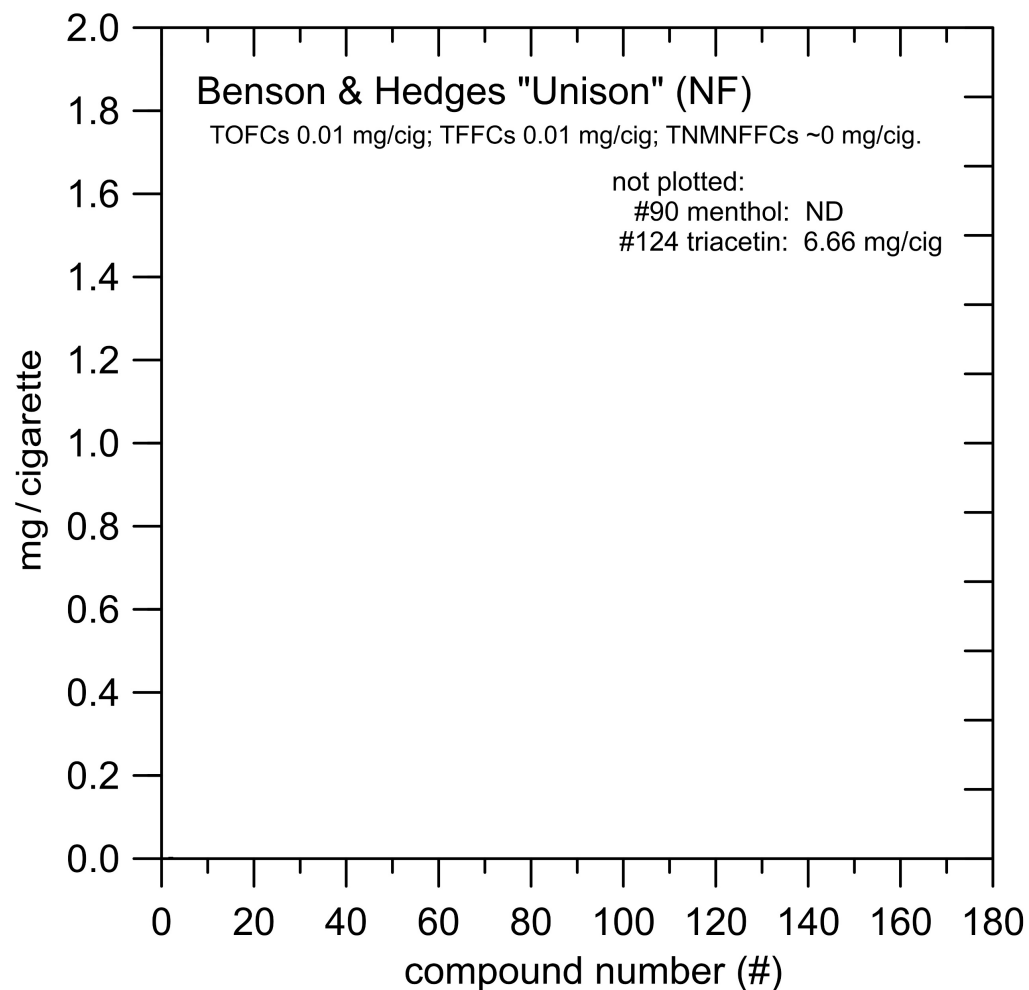

## Figure S26.a. Pack #26. Camel “North, Aqua Filter” (NF) (Canada)

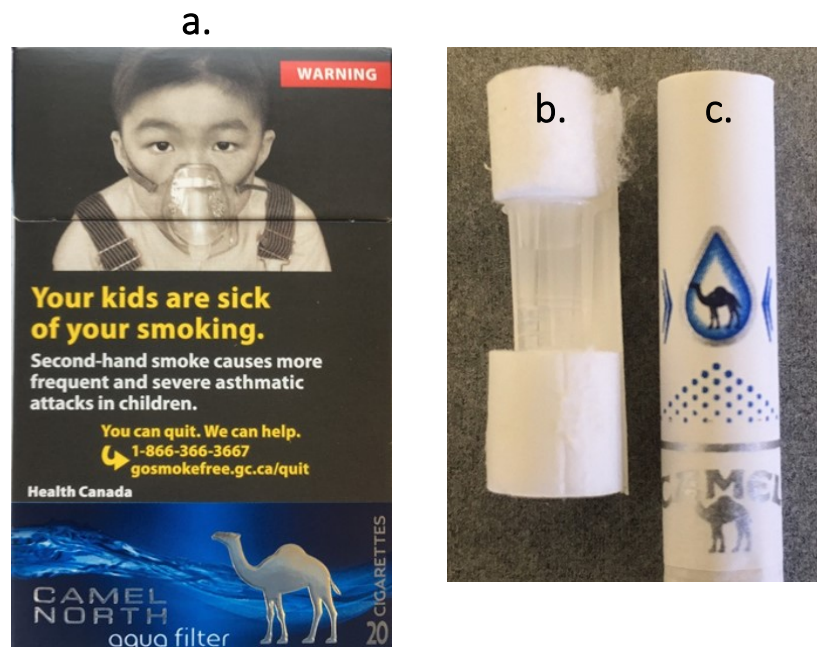

- a. Photo of pack (front);
- b. Opened filter showing cavity;
- b. Filter end of cigarette.

Photos Copyright Portland State University, 2020.

Figure S26.b. Pack #26. Camel “North, Aqua Filter” (NF)

TOFCs = total other flavour compounds; TFFCs = total fruit flavour compounds;  
TNMNFFCs = total non-menthol non-fruit flavour compounds.

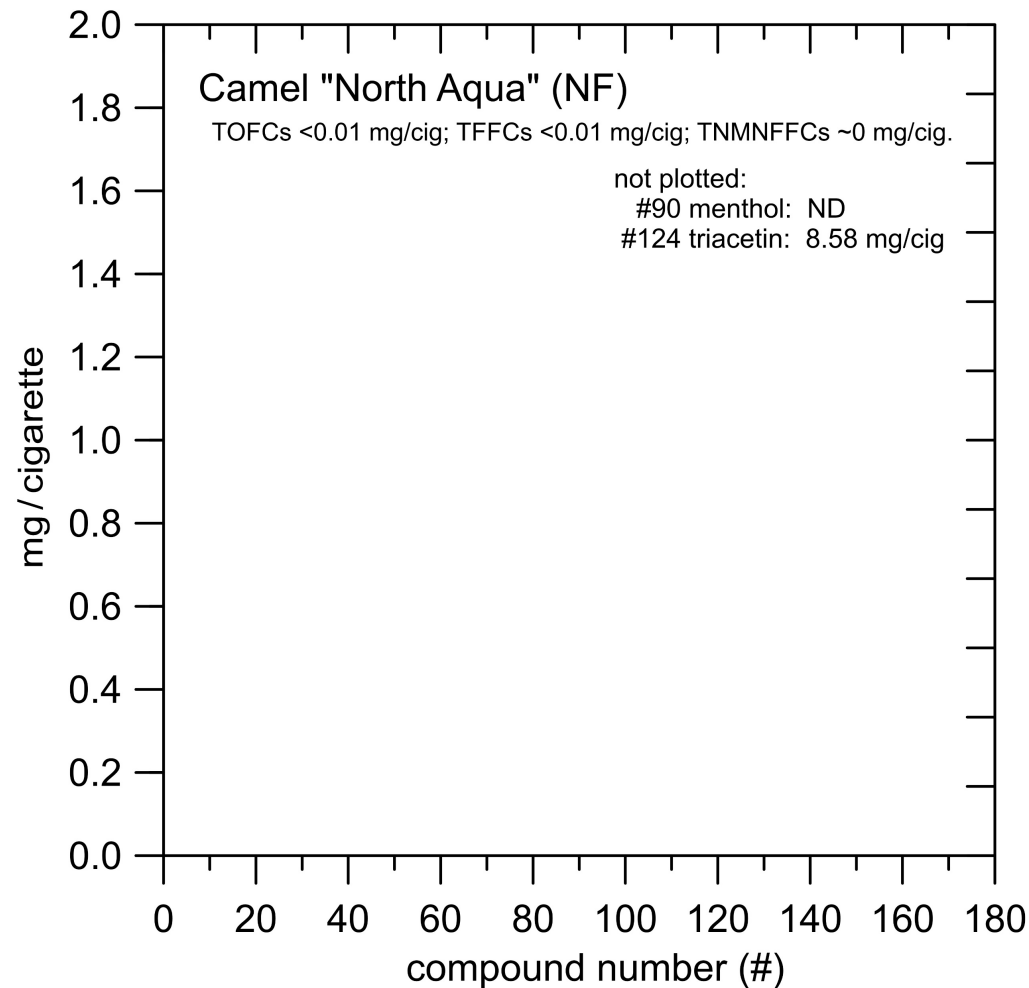

# Figure S27.a. Pack #27. du Maurier “Nano Blue” (NF) (Canada)

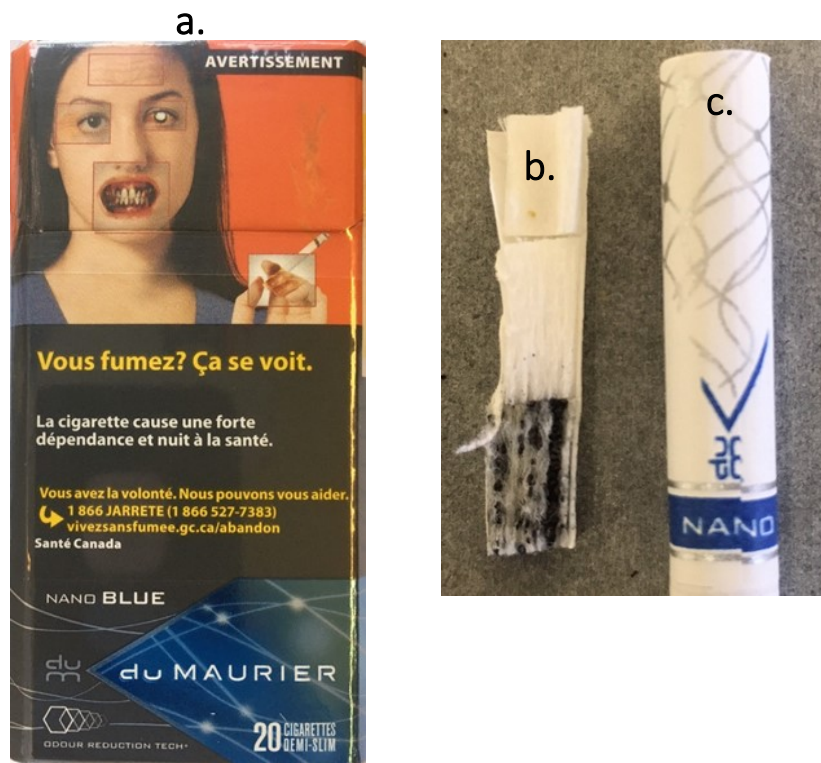

- a. Photo of pack (front);
- b. Opened filter showing a black powder (likely activated charcoal);
- b. Filter end of cigarette.

Photos Copyright Portland State University, 2020.

Figure S27.b. Pack #27. du Maurier “Nano Blue” (NF)

TOFCs = total other flavour compounds; TFFCs = total fruit flavour compounds;  
TNMNFFCs = total non-menthol non-fruit flavour compounds.

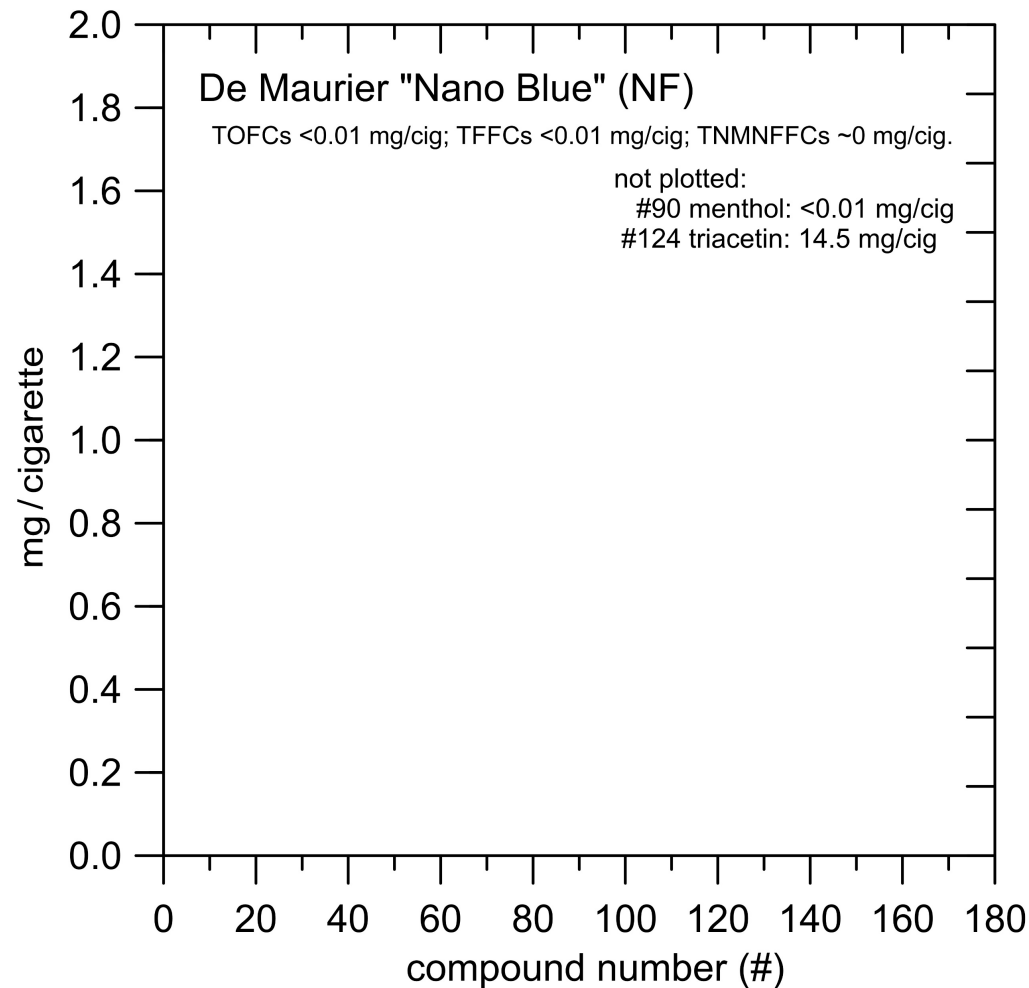

Figure S28. Triacetin (mg/cigarette) vs. menthol (mg/cigarette).

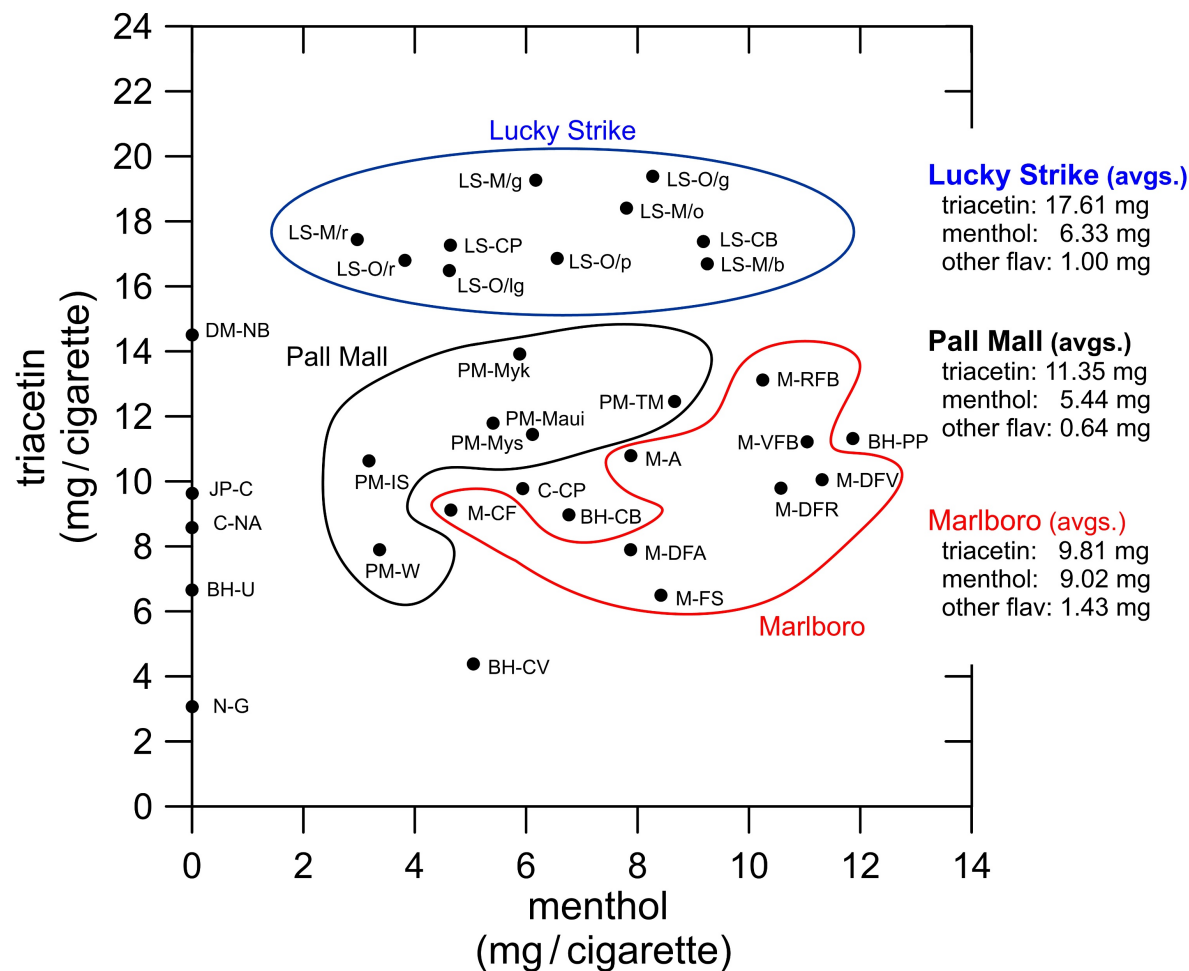

Figure S29. TOFCs (mg/cigarette) vs. menthol (mg/cigarette).

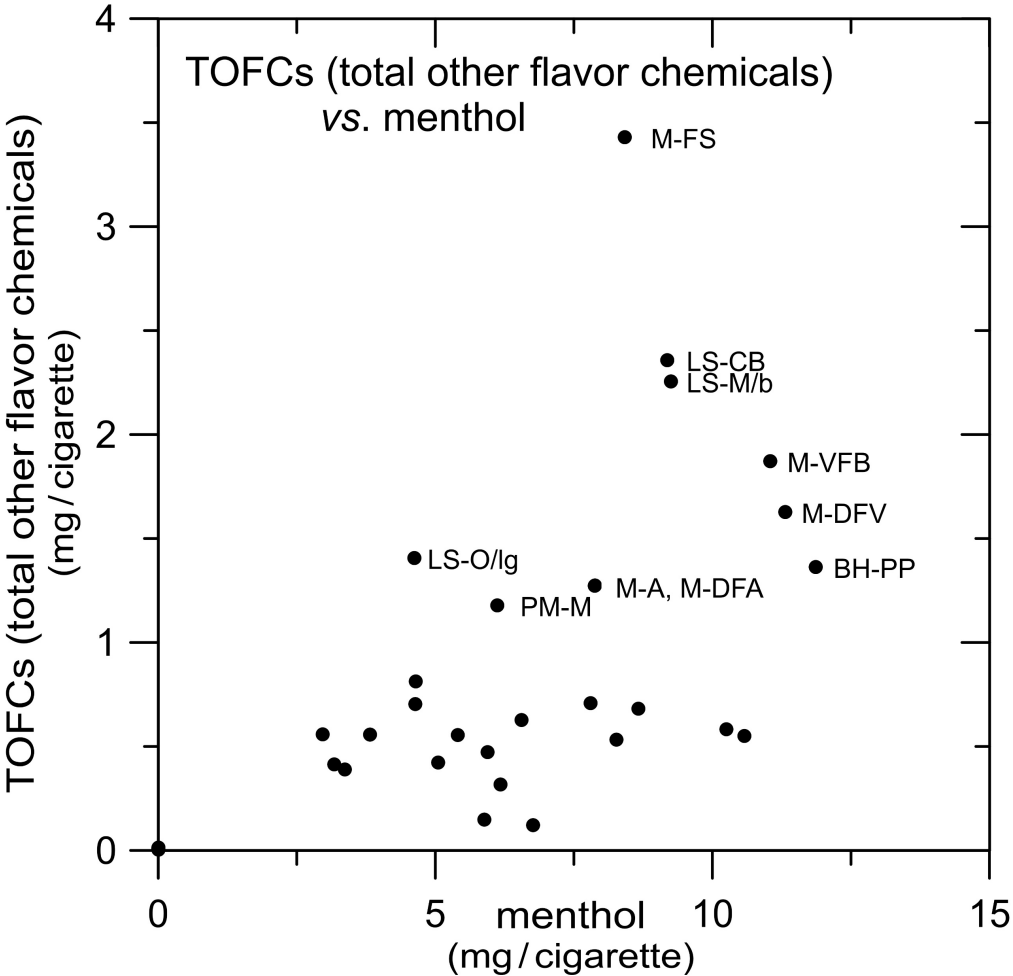

Supplement: tobaccocontrol-2020-056173supp001_data_supplement.pdf [file tobaccocontrol-2020-056173supp001_data_supplement.pdf]
