# Supplementary material for: 'Menthol-Plus’: a major category of cigarette found among ‘concept’ descriptor cigarettes from Mexico
Source: PubMed Central journal article supplement — Tob Control. 2021 Mar 9;31(e1):e18–24. doi: 10.1136/tobaccocontrol-2020-056173 (PMC9340044; doi:10.1136/tobaccocontrol-2020-056173), 2021-03-09

## Supplementary Materials

### ~Figures~

#### “Menthol-Plus”: A Major Category of Cigarette Found Among “Concept Descriptor” Cigarettes from Mexico

James F. Pankow, Wentai Luo, Kevin J. McWhirter, Samantha M. Gillette, and Joanna E. Cohen.

#### List of Supplementary Figures

##### Pack and Filter Photos, and Flavor Bar Charts

- S1.a/b Marlboro "Fusion Shine" – Mexico
- S2.a/b Lucky Strike "Convertibles, Blue" – Mexico
- S3.a/b Lucky Strike "Flow Filter" March – Mexico
- S4.a/b Marlboro "Velvet Fusion Blast" – Mexico
- S5.a/b Marlboro "Double Fusion Velvet" – Mexico
- S6.a/b Lucky Strike "Flow Filter" October – Mexico
- S7.a/b Benson & Hedges "Polar Pearls" – Mexico
- S8.a/b Marlboro "Amber" – Mexico
- S9.a/b Marlboro "Double Fusion Amber" – Mexico
- S10.a/b Pall Mall/XL "Mystery" – Mexico
- S11.a/b Marlboro "Capsula Fresca" – Mexico
- S12.a/b Lucky Strike "Convertibles, Purple" – Mexico
- S13.a/b Pall Mall/XL "Tokyo Midnight" – Mexico
- S14.a/b Marlboro "Ruby Fusion Blast" – Mexico
- S15.a/b Pall Mall/XL "Black Edition/Maui Crepuscule" – Mexico
- S16.a/b Marlboro "Double Fusion Ruby" – Mexico
- S17.a/b Chesterfield "Caps Purple" – Mexico
- S18.a/b Benson & Hedges "Crystal Violet" – Mexico
- S19.a/b Pall Mall/XL "Black Edition/Ibiza Sunset" – Mexico
- S20.a/b Pall Mall "Wave" – Mexico
- S21.a/b Pall Mall/XL "Mykonos Nightfall" – Mexico
- S22.a/b Benson & Hedges "Crystal Blue" – Mexico
- S23.a/b Next "Green" – Canada
- S24.a/b John Player "Choice" – Canada
- S25.a/b Benson & Hedges "Unison" – Canada
- S26.a/b Camel "North, Aqua Filter" – Canada
- S27.a/b Du Maurier "Nano Blue" – Canada

##### Additional Supplementary Figures

- S28 Triacetin vs. Menthol
- S29 Total Other Flavor Chemicals (TOFCs) vs. Menthol

## Figure S1.a. Pack #1. Marlboro “Fusion Shine” (M+4) (Mexico)

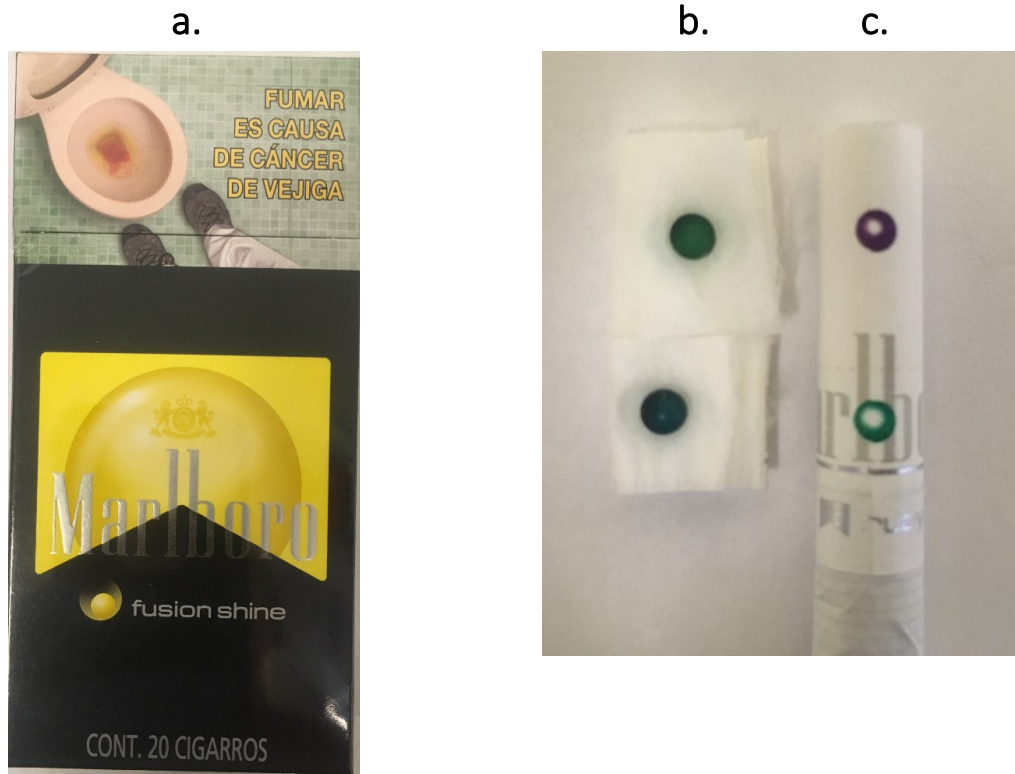

- a. Photo of pack (front);
- b. Opened filter showing two crushable flavor capsules (uncrushed);
- b. Filter end of cigarette.

Photos Copyright Portland State University, 2020.

## Figure S1.b. Pack #1. Marlboro "Fusion Shine" (M+4)

TOFCs = total other flavour compounds; TFFCs = total fruit flavour compounds;  
TNMNFFCs = total non-menthol non-fruit flavour compounds.

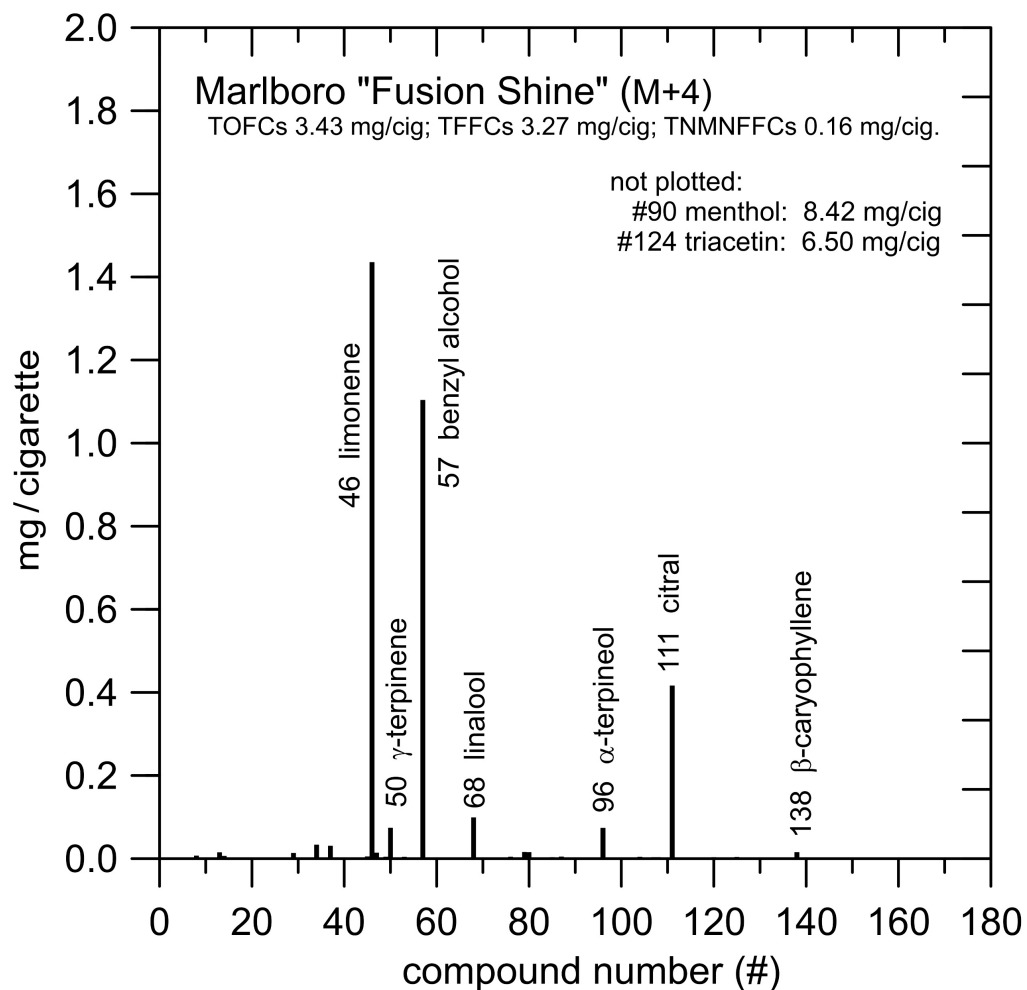

## Figure S2.a. Pack #2. Lucky Strike “Convertibles” blue (M+3) (Mexico)

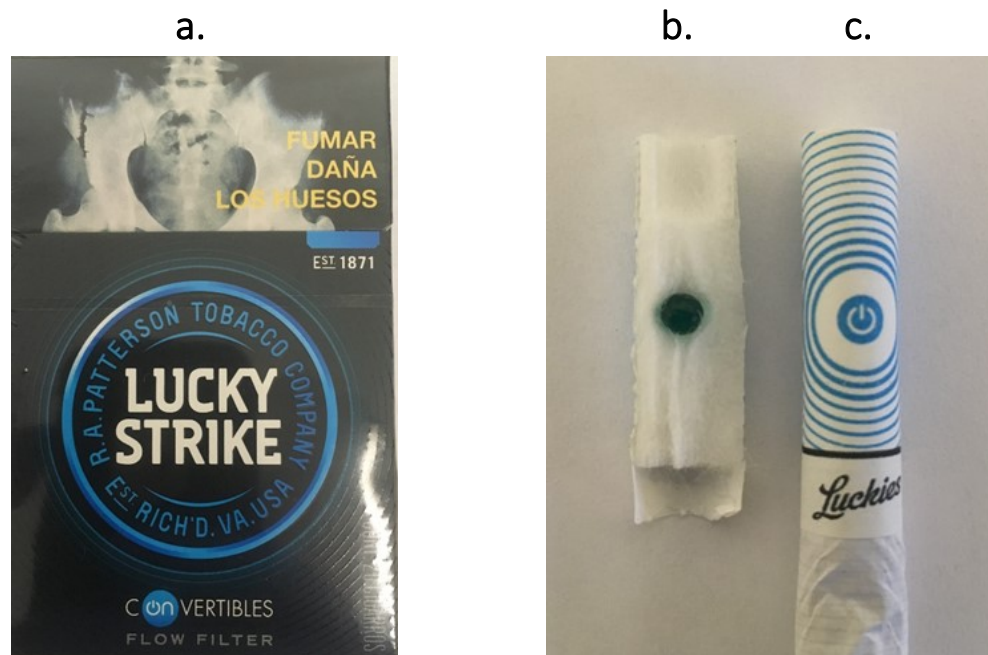

- a. Photo of pack (front);
- b. Opened filter showing one crushable flavor capsule (uncrushed);
- b. Filter end of cigarette.

Photos Copyright Portland State University, 2020.



## Figure S2.b. Pack #2. Lucky Strike "Convertibles" blue (M+3)

TOFCs = total other flavour compounds; TFFCs = total fruit flavour compounds;  
TNMNFCCs = total non-menthol non-fruit flavour compounds.

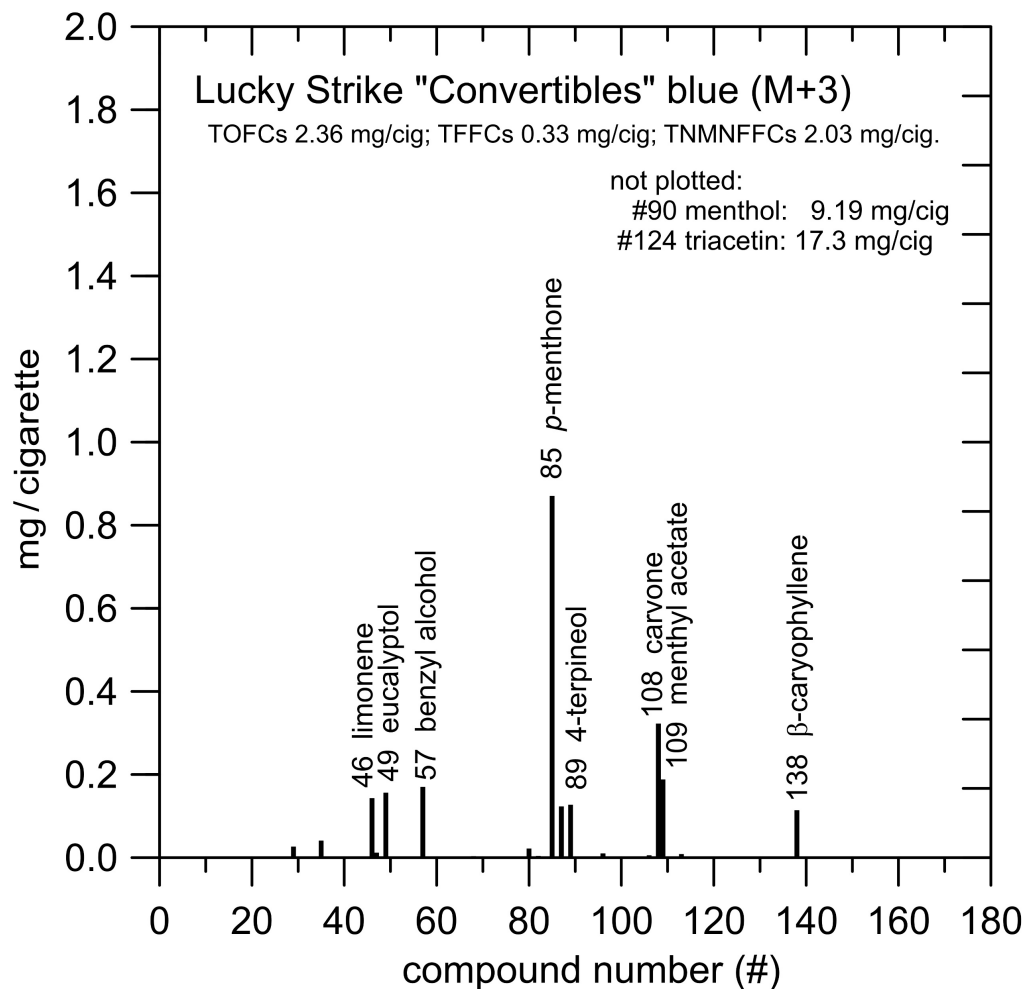

## Figure S3.a. Pack #3. Lucky Strike “Flow Filter” March

Sampler Flavour Categories: blue, M+3; orange, M+1+, red, M+1; and green, M+1.

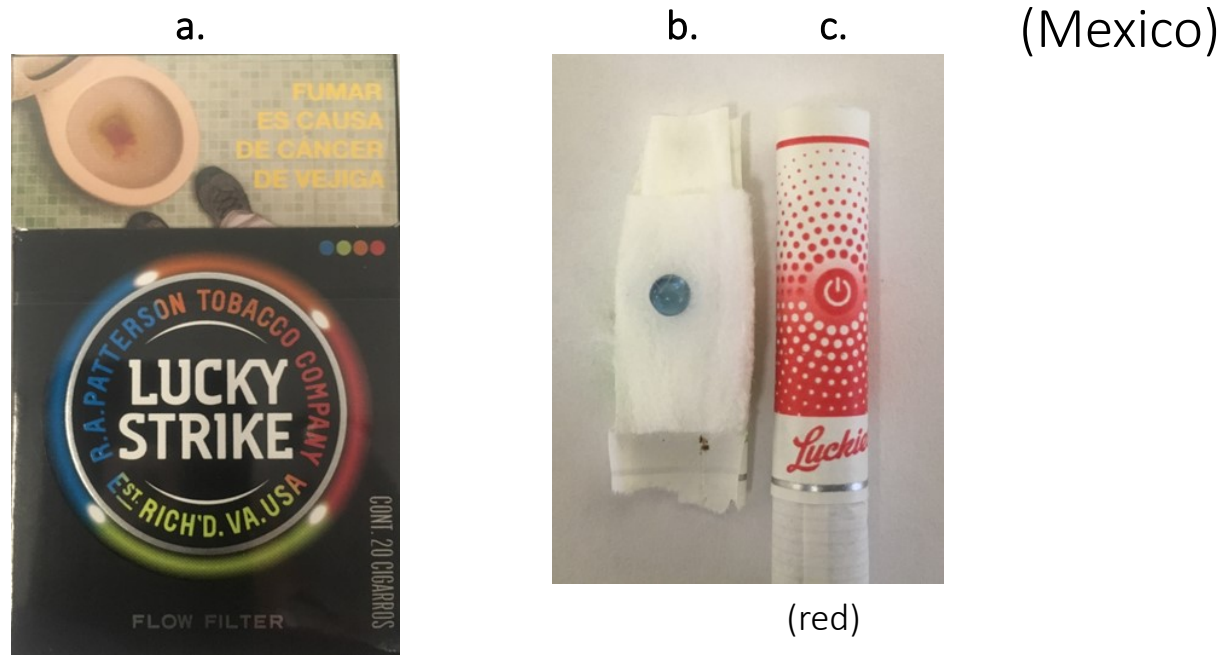

- a. Photo of pack (front);
- b. Opened filter (red version) showing one crushable flavor capsule (uncrushed);
- b. Filter end of cigarette.

Photos Copyright Portland State University, 2020.

## Figure S3.b.1. Pack #3. Lucky Strike "Flow Filter" March/blue (M+3)

TOFCs = total other flavour compounds; TFFCs = total fruit flavour compounds;  
TNMNFCCs = total non-menthol non-fruit flavour compounds.

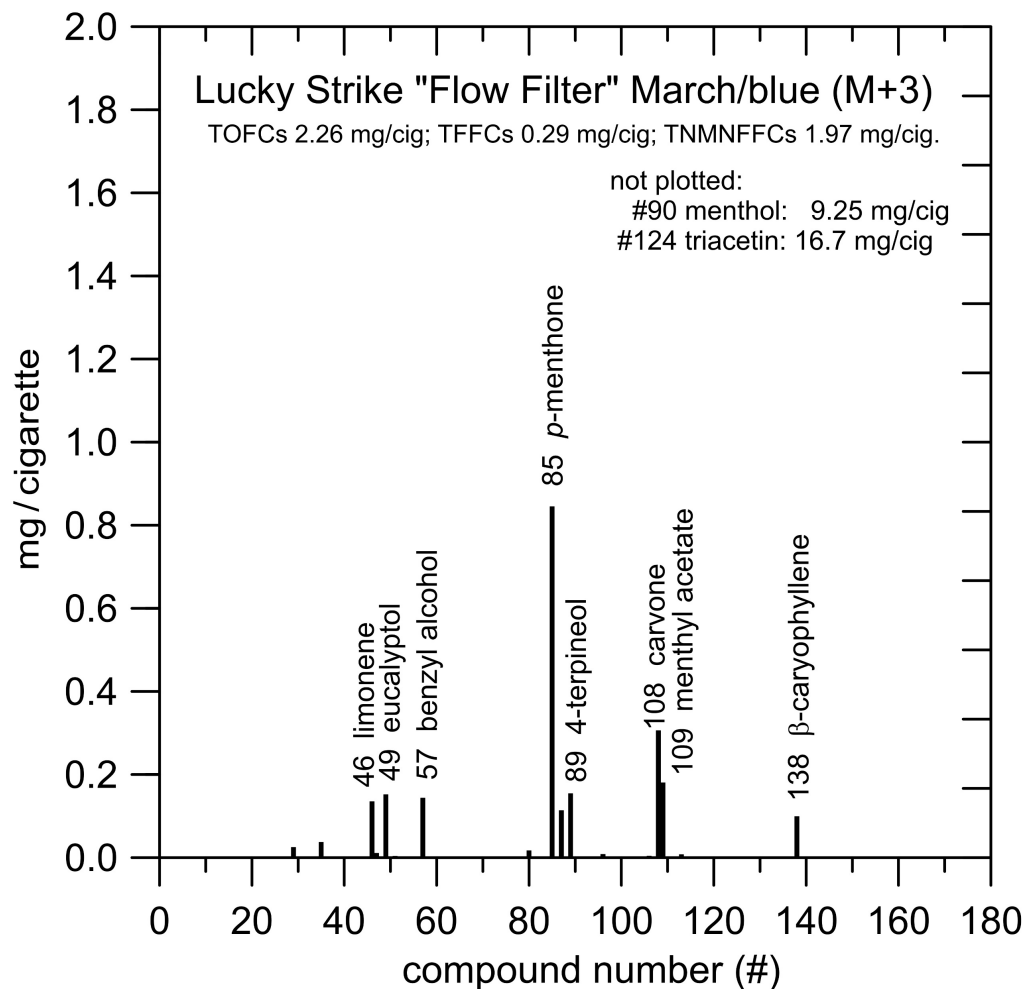

## Figure S3.b.2. Pack #3. Lucky Strike "Flow Filter" March/orange (M+1)

TOFCs = total other flavour compounds; TFFCs = total fruit flavour compounds;  
TNMNFCCs = total non-menthol non-fruit flavour compounds.

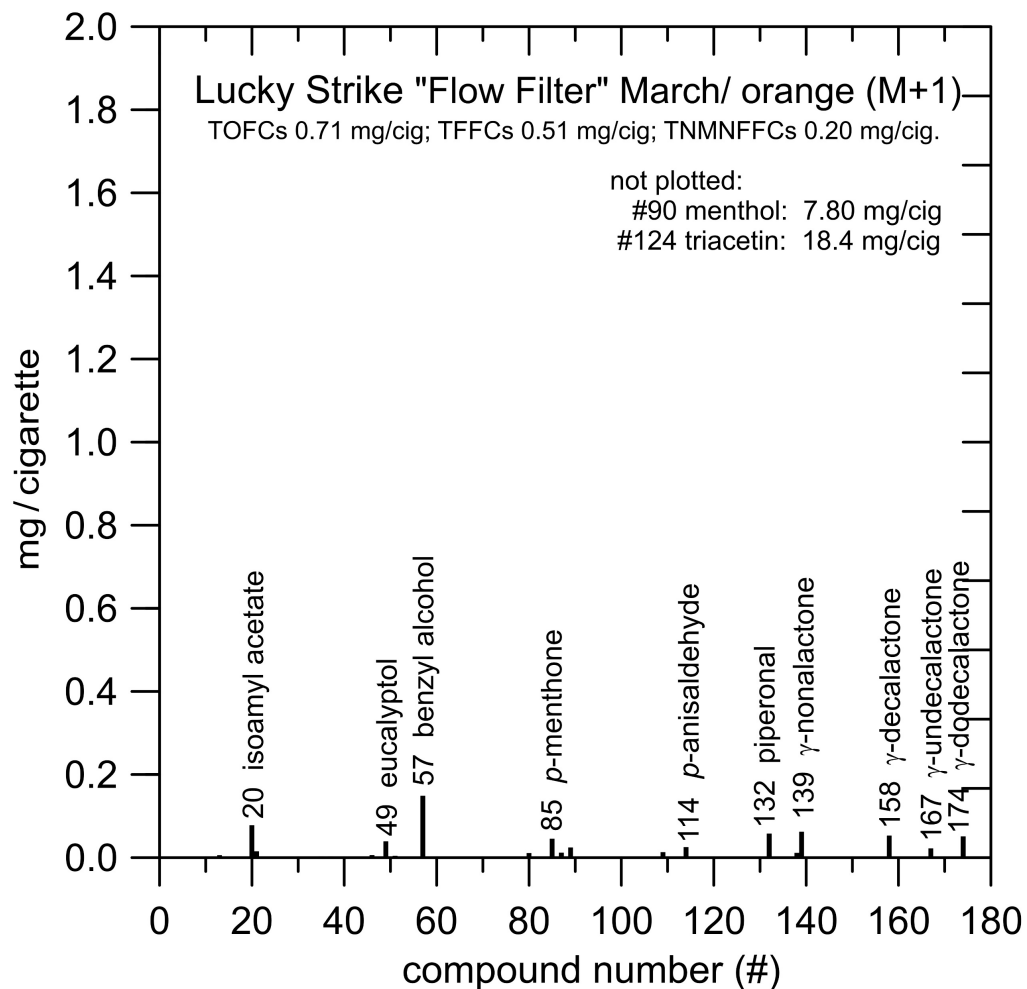

### Figure S3.b.3. Pack #3. Lucky Strike "Flow Filter" March/red (M+1)

TOFCs = total other flavour compounds; TFFCs = total fruit flavour compounds;  
TNMNFCCs = total non-menthol non-fruit flavour compounds.

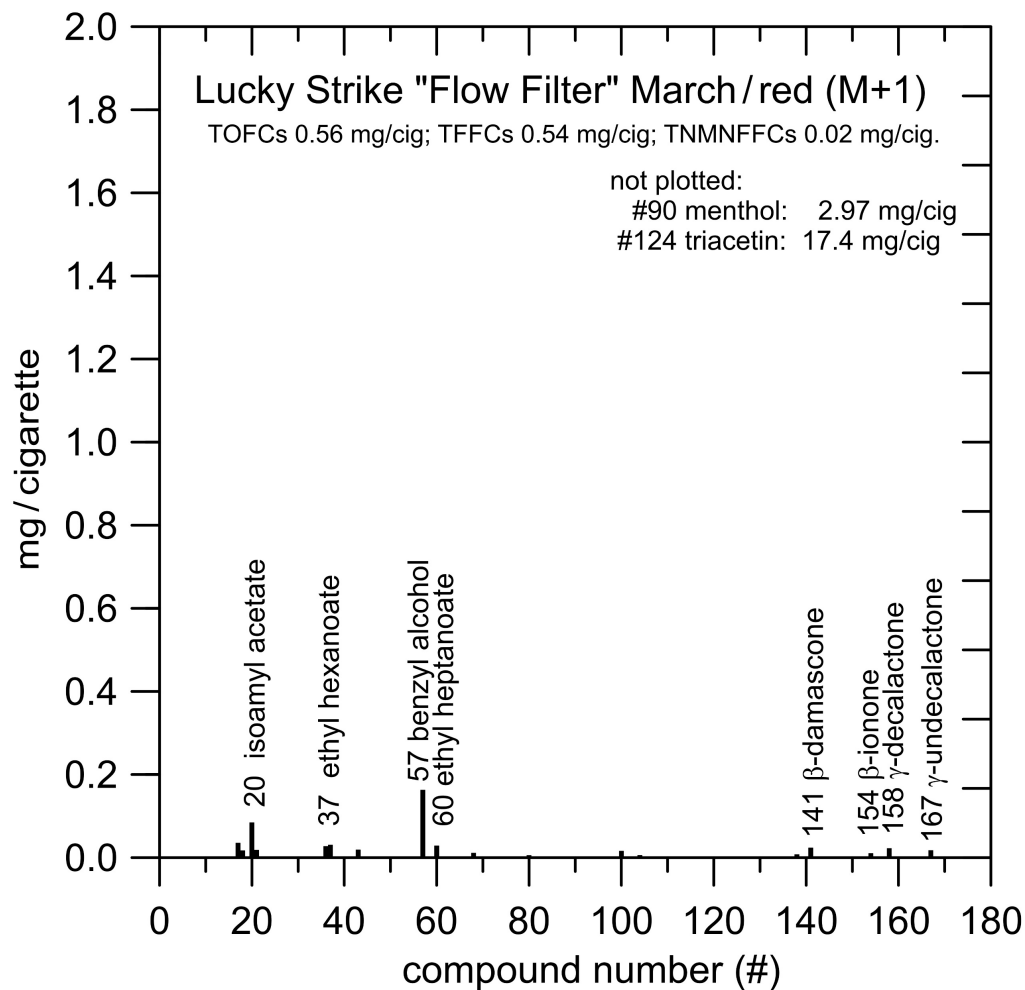

## Figure S3.b.4. Pack #3. Lucky Strike "Flow Filter" March/green (M+1)

TOFCs = total other flavour compounds; TFFCs = total fruit flavour compounds;  
TNMNFFCs = total non-menthol non-fruit flavour compounds.

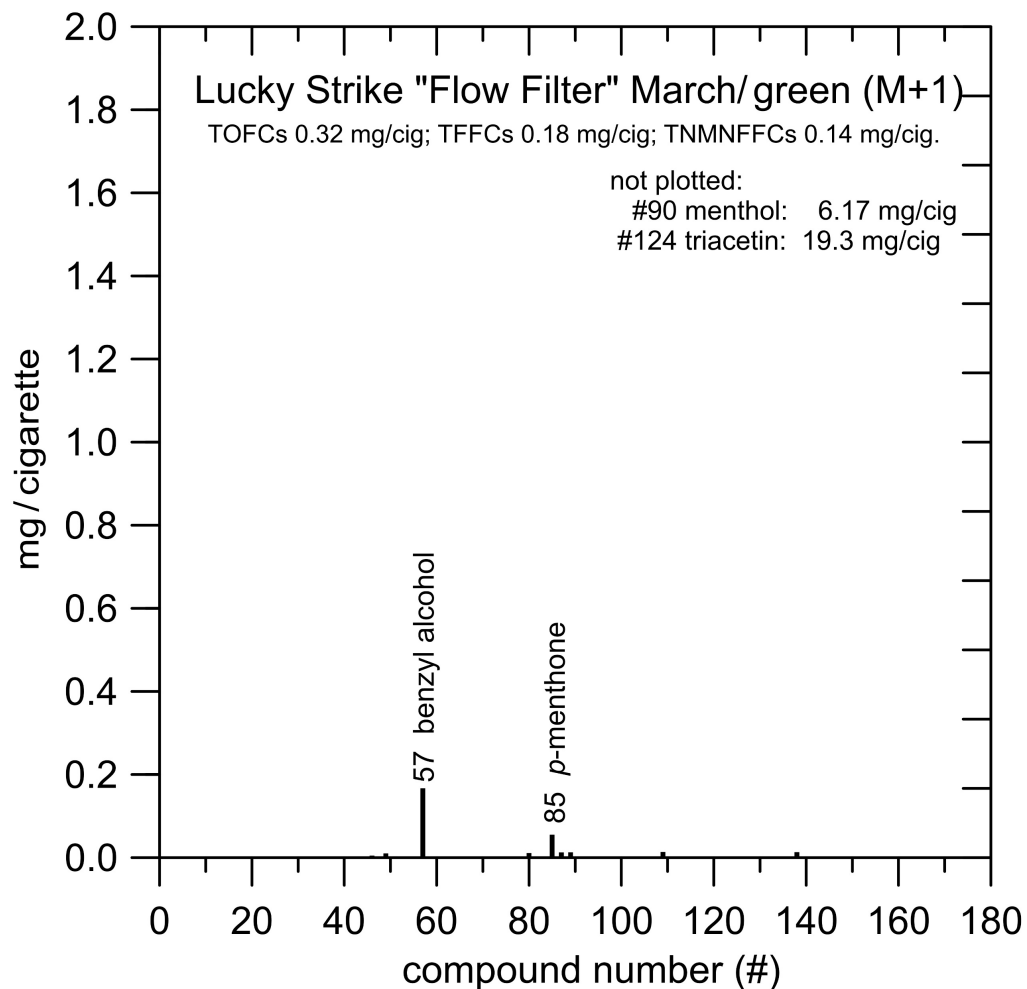

## Figure S4.a. Pack #4. Marlboro “Velvet Fusion Blast” (M+2) (Mexico)

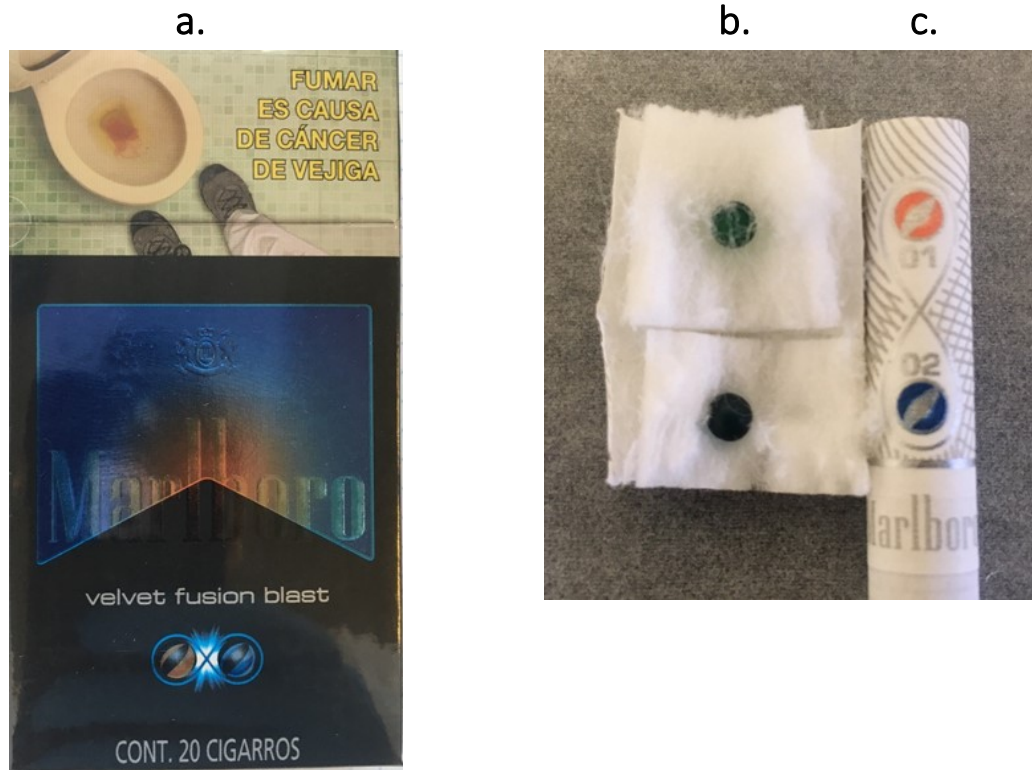

- a. Photo of pack (front);
- b. Opened filter showing two crushable flavor capsules (uncrushed);
- b. Filter end of cigarette.

Photos Copyright Portland State University, 2020.

## Figure S4.b. Pack #4. Marlboro "Velvet Fusion Blast" (M+2)

TOFCs = total other flavour compounds; TFFCs = total fruit flavour compounds;  
TNMNFCCs = total non-menthol non-fruit flavour compounds.

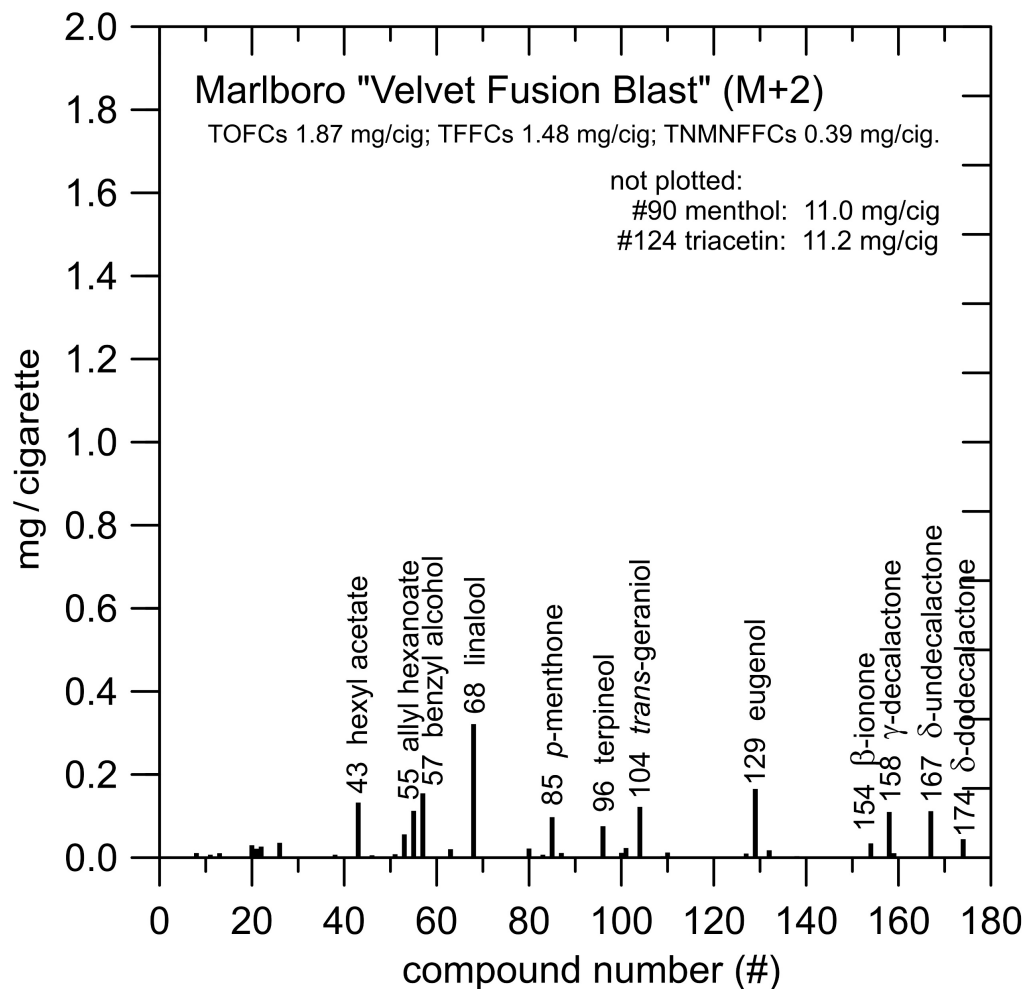



Figure S5.a. Pack #5. Marlboro “Double Fusion Velvet” (M+2)  
(Mexico)

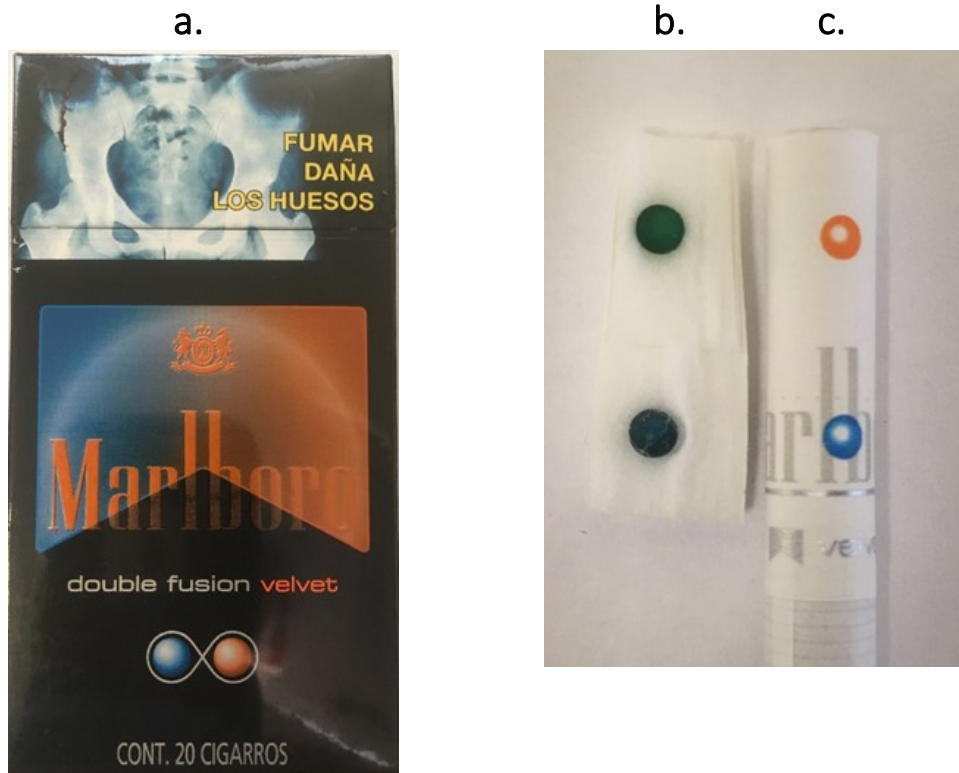

- a. Photo of pack (front);
- b. Opened filter showing two crushable flavor capsules (uncrushed);
- b. Filter end of cigarette.

Photos Copyright Portland State University, 2020.

## Figure S5.b. Pack #5. Marlboro "Double Fusion Velvet" (M+2)

TOFCs = total other flavour compounds; TFFCs = total fruit flavour compounds;  
TNMNFCCs = total non-menthol non-fruit flavour compounds.

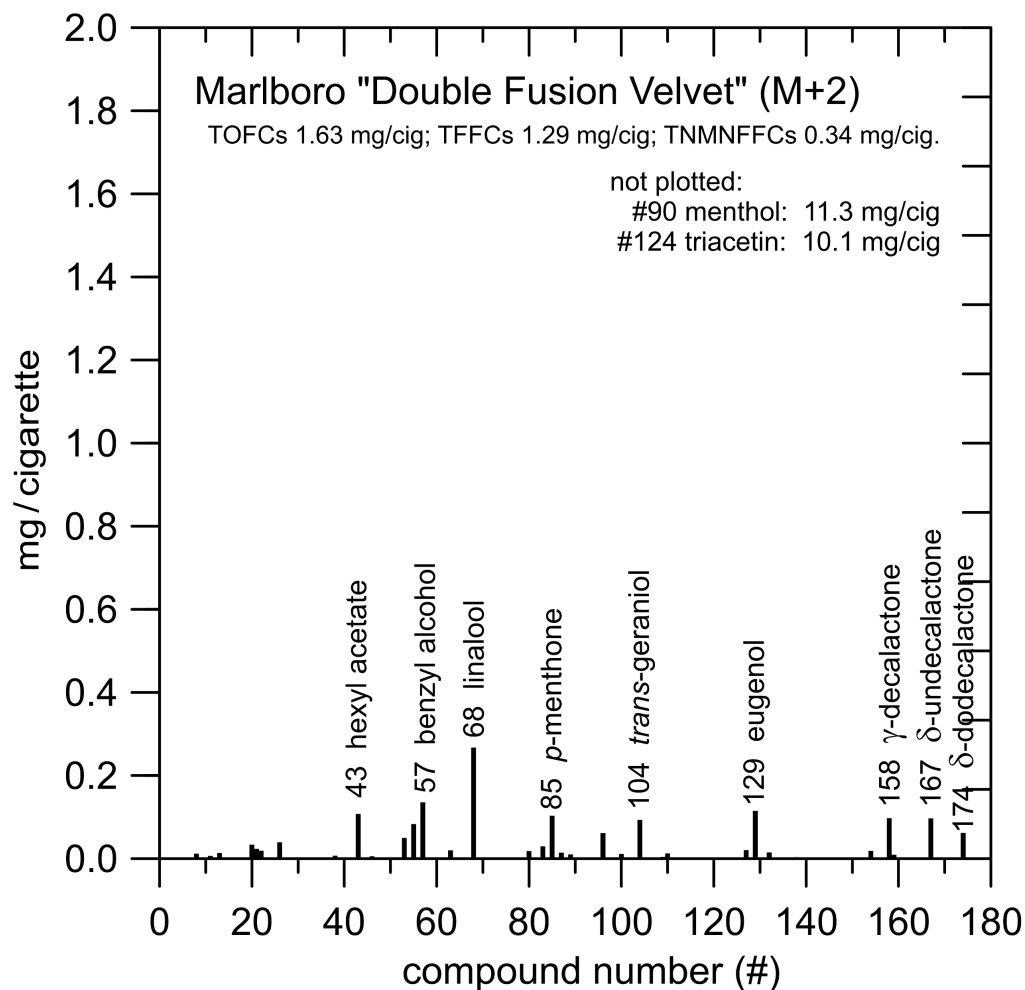

## Figure S6.a. Pack #6. Lucky Strike “Flow Filter” (October)

Sampler Flavour Categories: light green, M+2; purple, M+1; red, M+1+; and green, M+1.

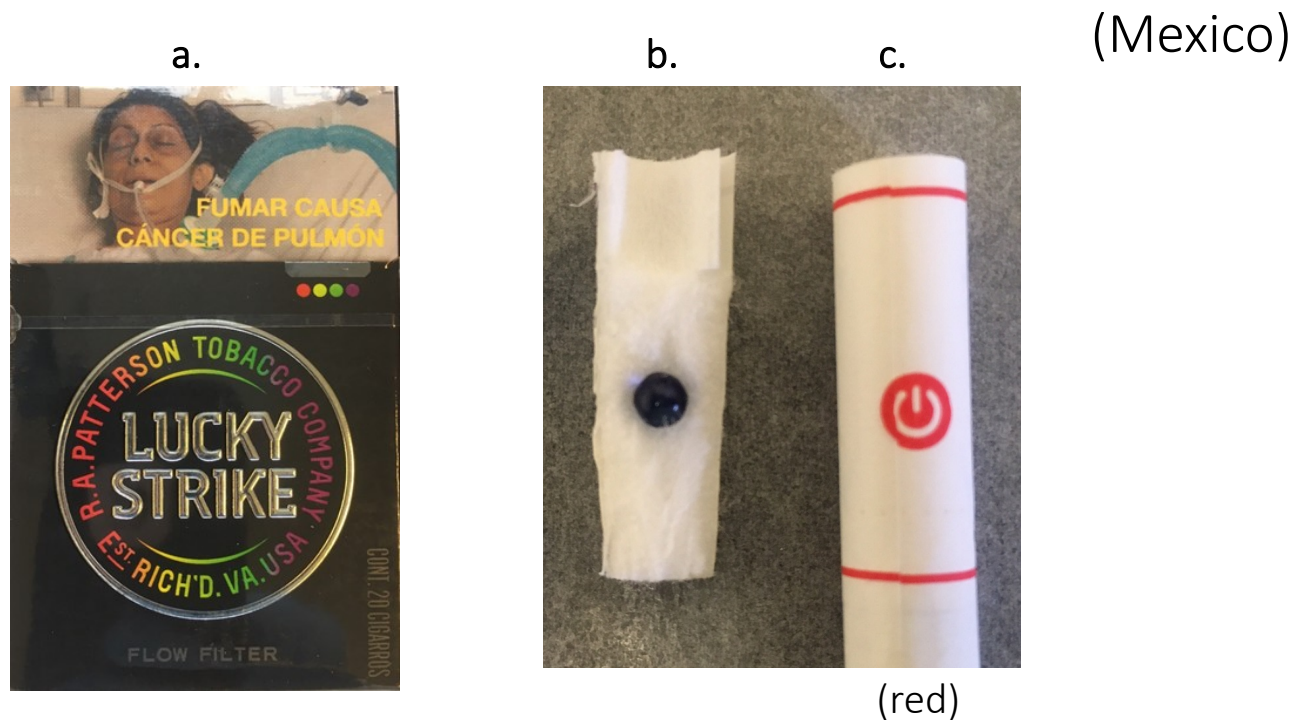

- a. Photo of pack (front);  
b. Opened filter (red version) showing one crushable flavor capsule (uncrushed);  
b. Filter end of cigarette.

Photos Copyright Portland State University, 2020.

## Figure S6.b.1. Pack #6. Lucky Strike "Flow Filter" October/lit. green (M+2)

TOFCs = total other flavour compounds; TFFCs = total fruit flavour compounds;  
TNMNFCCs = total non-menthol non-fruit flavour compounds.

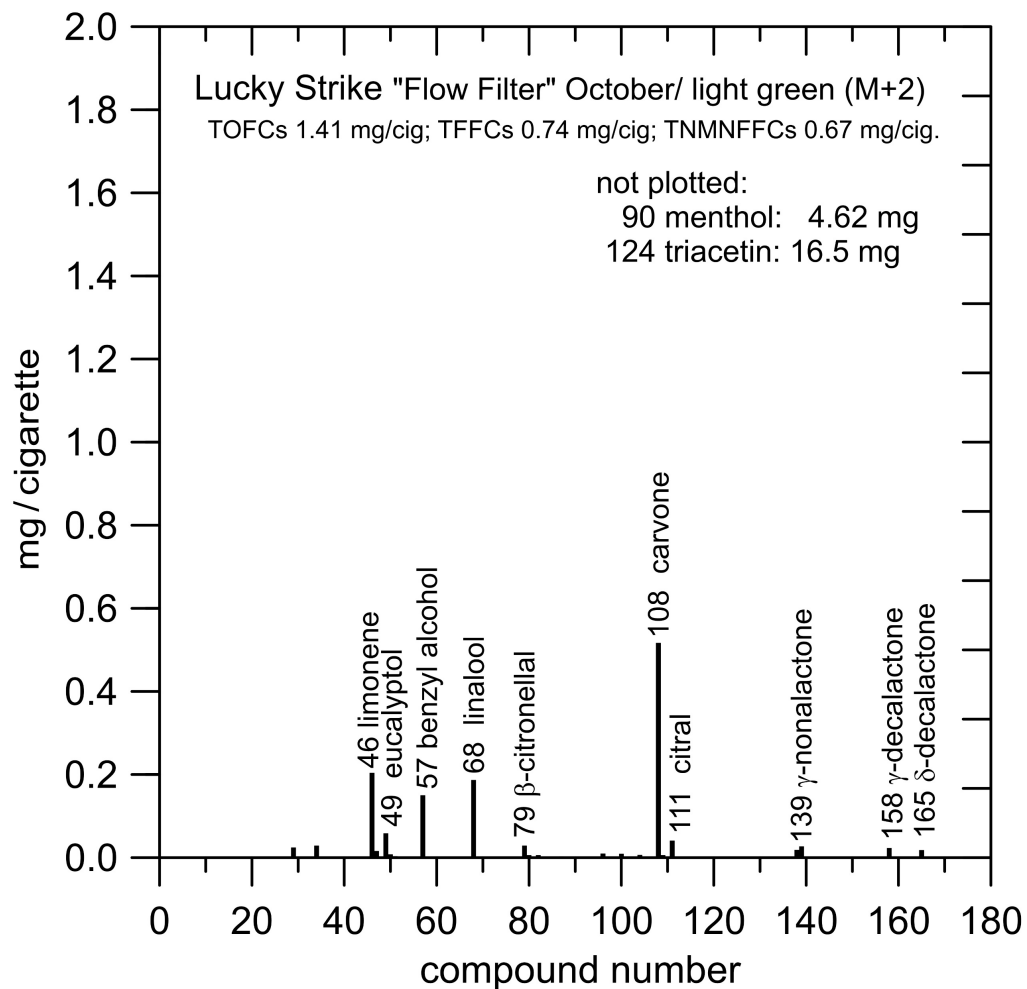

## Figure S6.b.2. Pack #6. Lucky Strike "Flow Filter" October/purple (M+1)

TOFCs = total other flavour compounds; TFFCs = total fruit flavour compounds;  
TNMNFCCs = total non-menthol non-fruit flavour compounds.

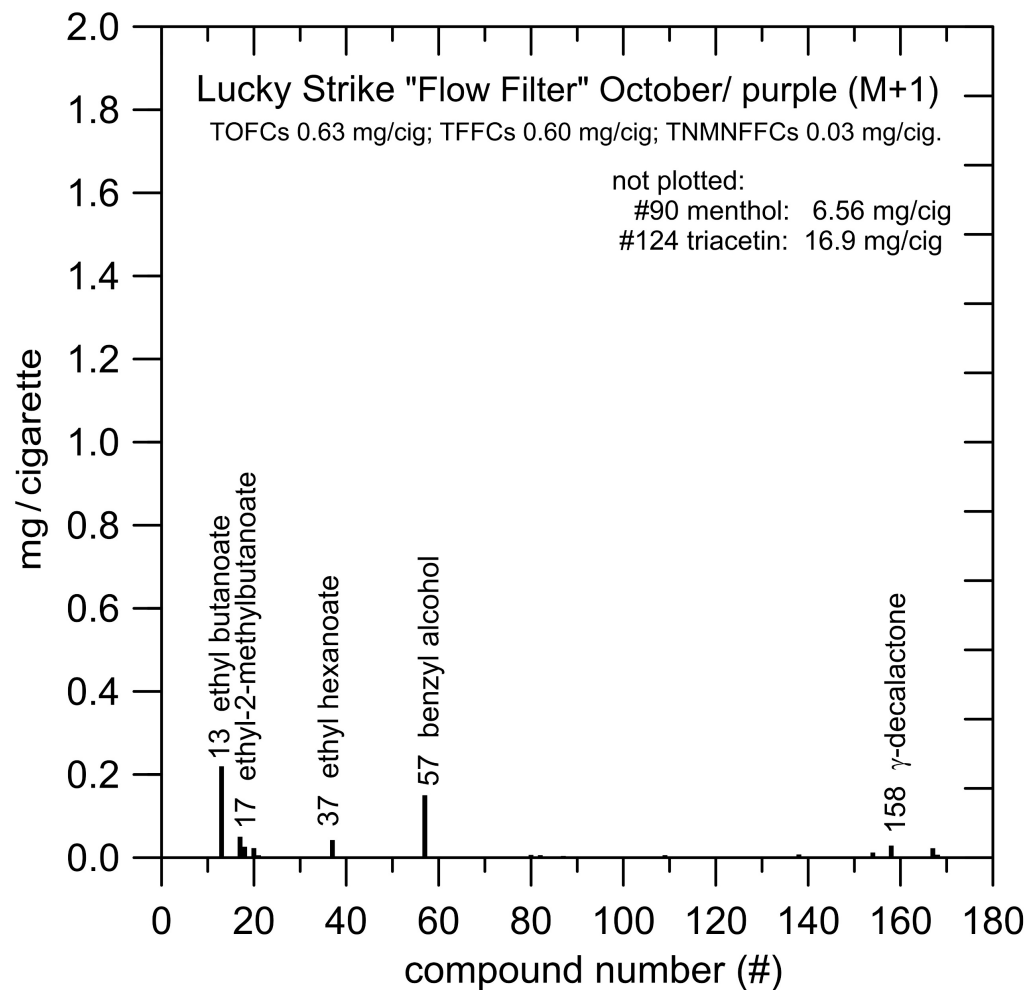

## Figure S6.b.3. Pack #6. Lucky Strike "Flow Filter" October/red (M+1)

TOFCs = total other flavour compounds; TFFCs = total fruit flavour compounds;  
TNMNFFCs = total non-menthol non-fruit flavour compounds.

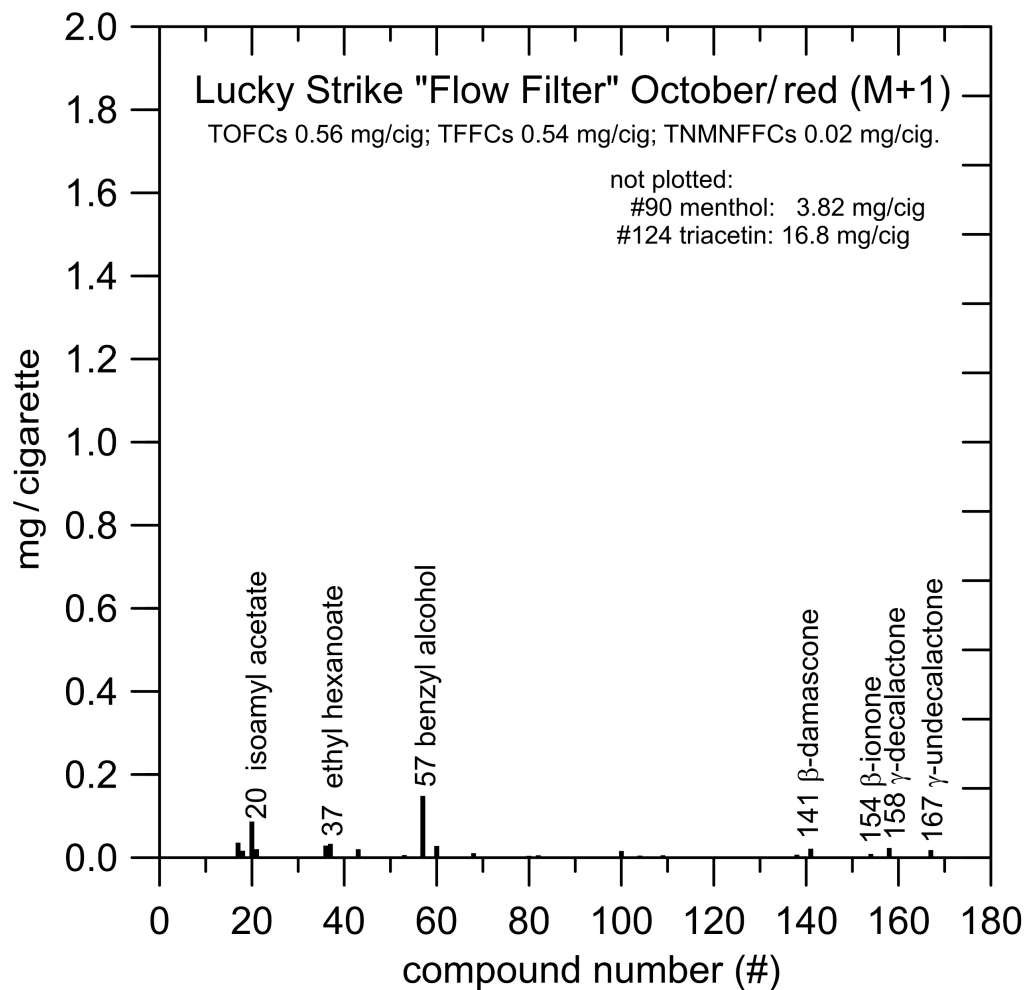

## Figure S6.b.4. Pack #6. Lucky Strike "Flow Filter" October/green (M+1)

TOFCs = total other flavour compounds; TFFCs = total fruit flavour compounds;  
TNMNFFCs = total non-menthol non-fruit flavour compounds.

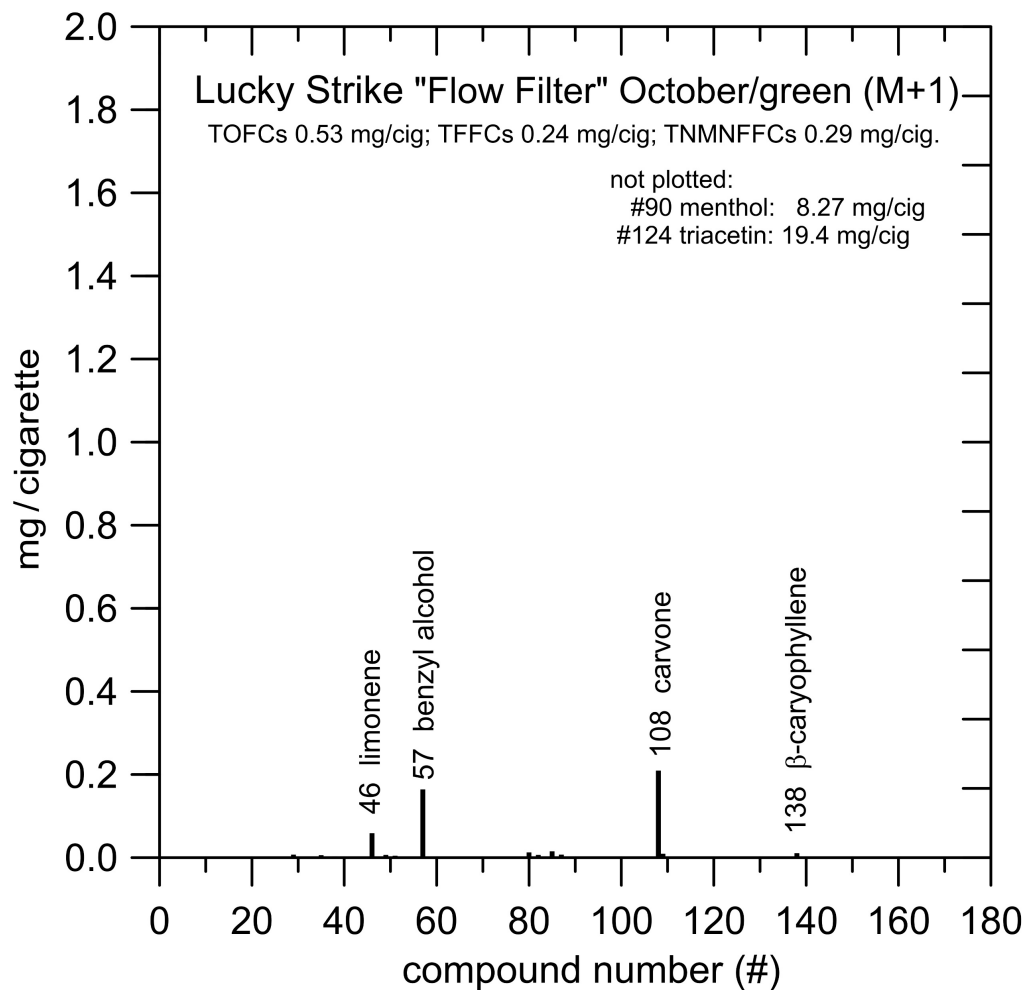

## Figure S7.a. Pack #7. Benson & Hedges “Polar Pearls” (M+2) (Mexico)

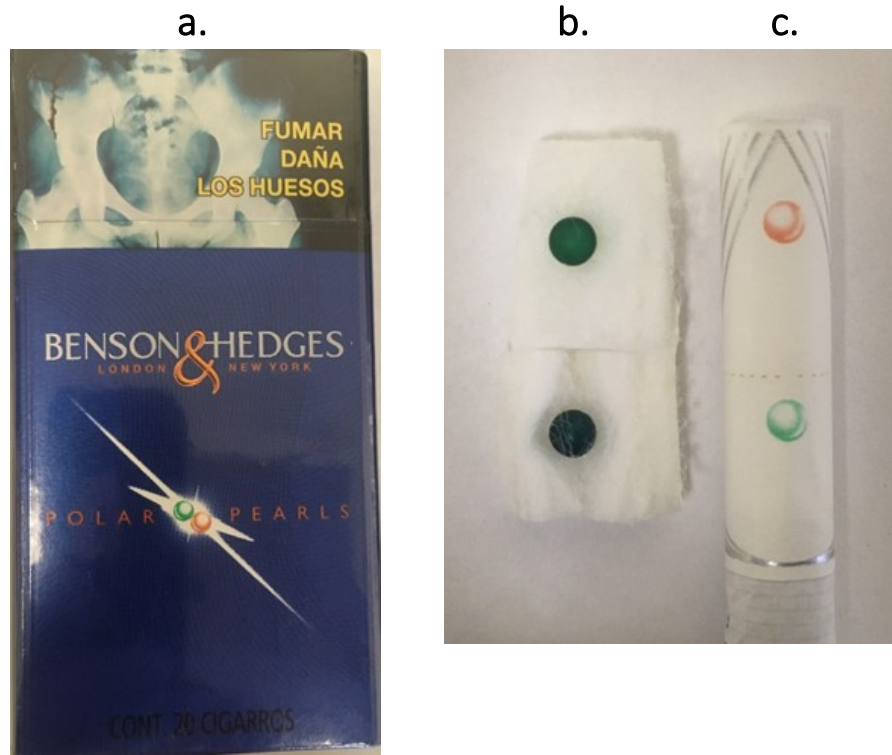

- a. Photo of pack (front);
- b. Opened filter showing two crushable flavor capsules (uncrushed);
- b. Filter end of cigarette.

Photos Copyright Portland State University, 2020.



## Figure S7.b. Pack #7. Benson & Hedges "Polar Pearls" (M+2)

TOFCs = total other flavour compounds; TFFCs = total fruit flavour compounds;  
TNMNFCCs = total non-menthol non-fruit flavour compounds.

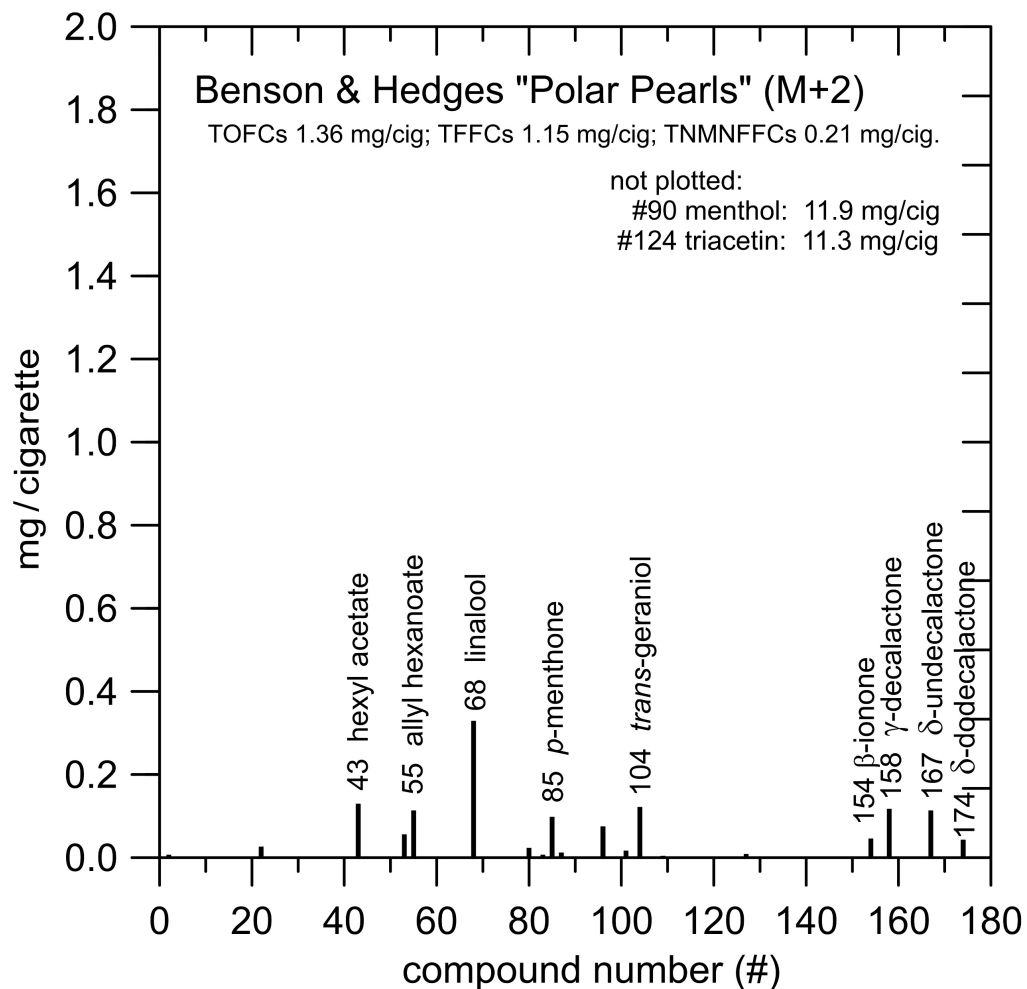

## Figure S8.a. Pack #8. Marlboro “Amber” (M+2) (Mexico)

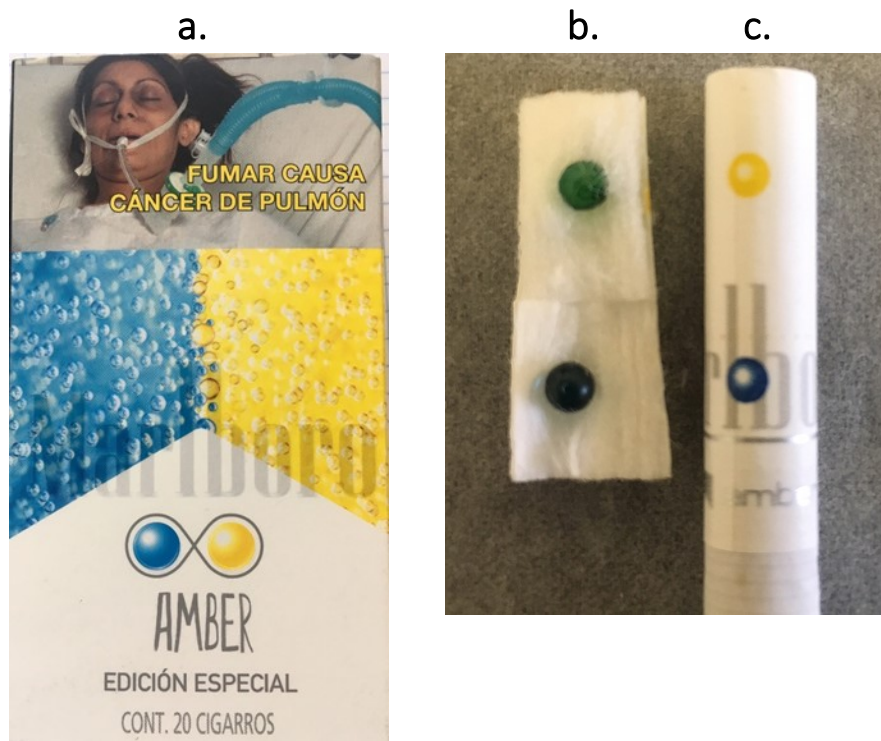

- a. Photo of pack (front);
- b. Opened filter showing two crushable flavor capsules (uncrushed);
- b. Filter end of cigarette.

Photos Copyright Portland State University, 2020.

## Figure S8.b. Pack #8. Marlboro "Amber" (M+2)

TOFCs = total other flavour compounds; TFFCs = total fruit flavour compounds;  
TNMNFCCs = total non-menthol non-fruit flavour compounds.

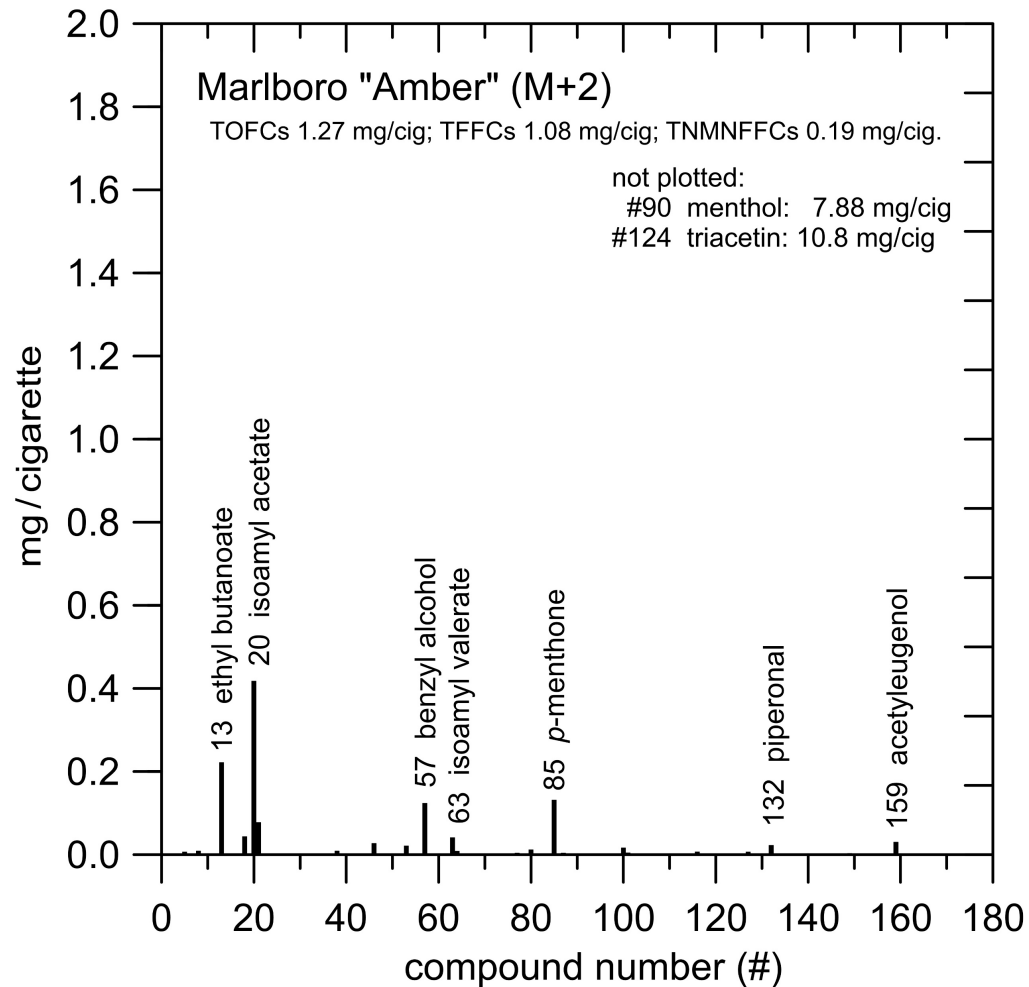

## Figure S9.a. Pack #9. Marlboro “Double Fusion Amber” (M+2) (Mexico)

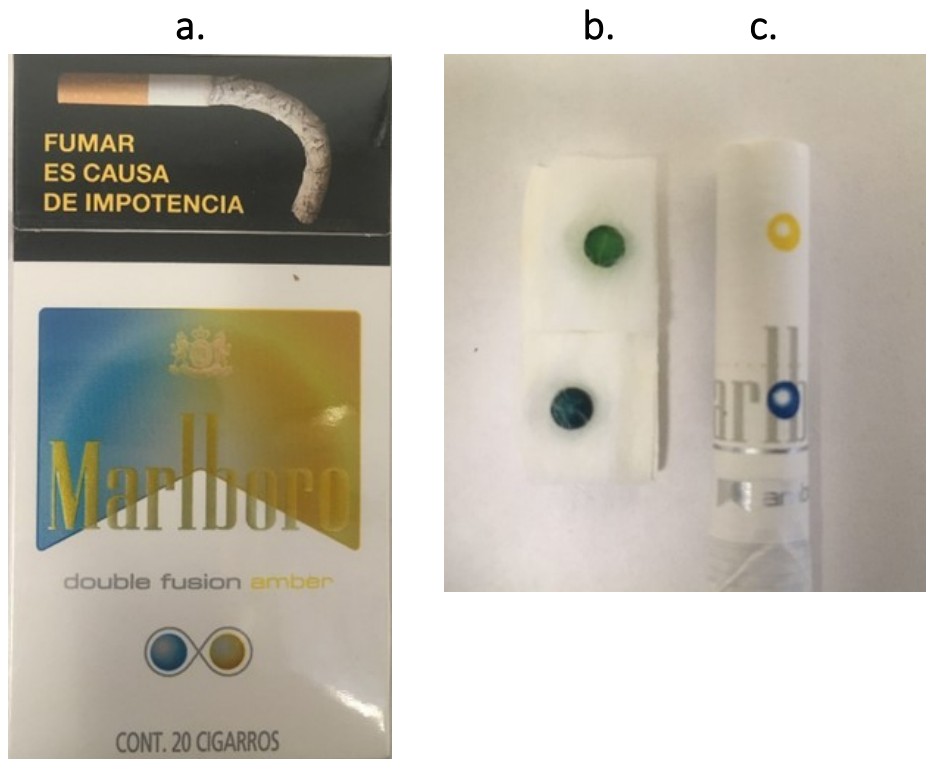

- a. Photo of pack (front);
- b. Opened filter showing two crushable flavor capsules (uncrushed);
- b. Filter end of cigarette.

Photos Copyright Portland State University, 2020.

## Figure S9.b. Pack #9. Marlboro "Double Fusion Amber" (M+2)

TOFCs = total other flavour compounds; TFFCs = total fruit flavour compounds;  
TNMNFCCs = total non-menthol non-fruit flavour compounds.

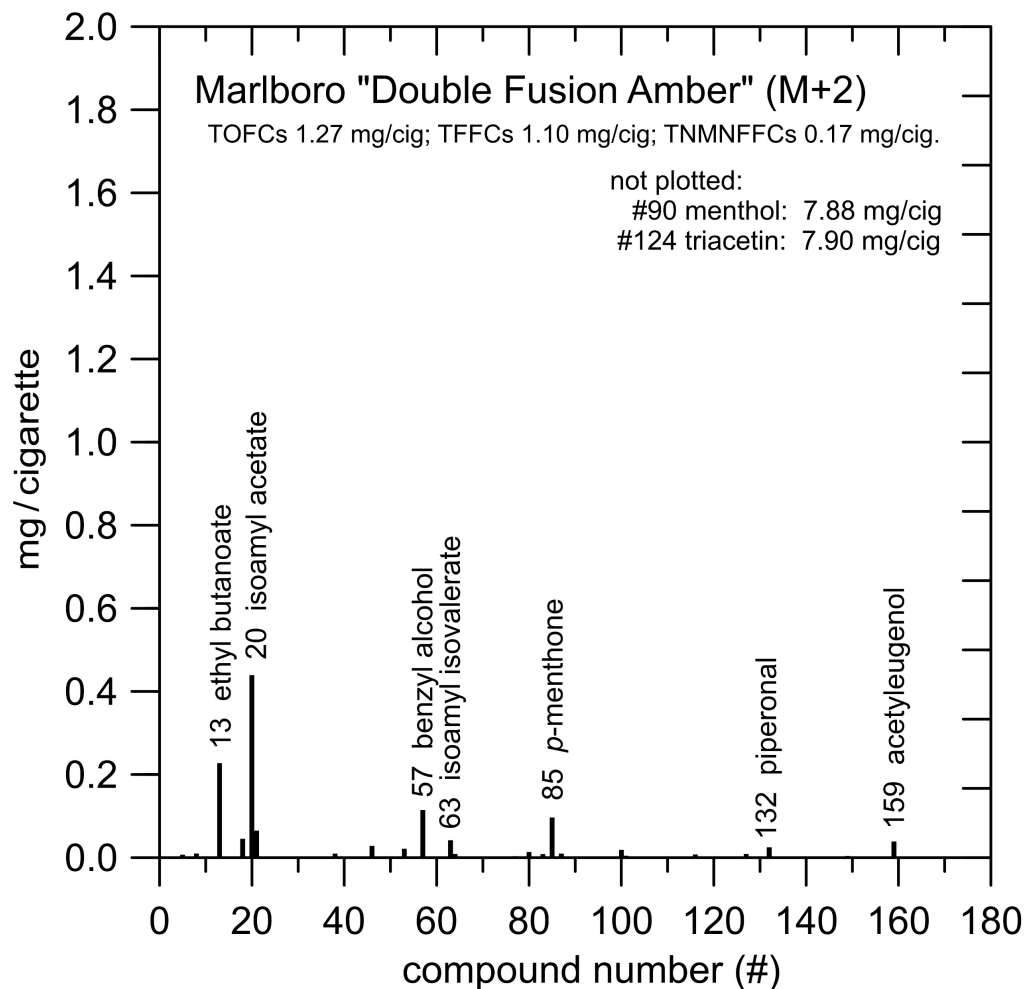

Figure S10.a. Pack #10. Pall Mall/XL “Mystery” (M+2)  
(Mexico)

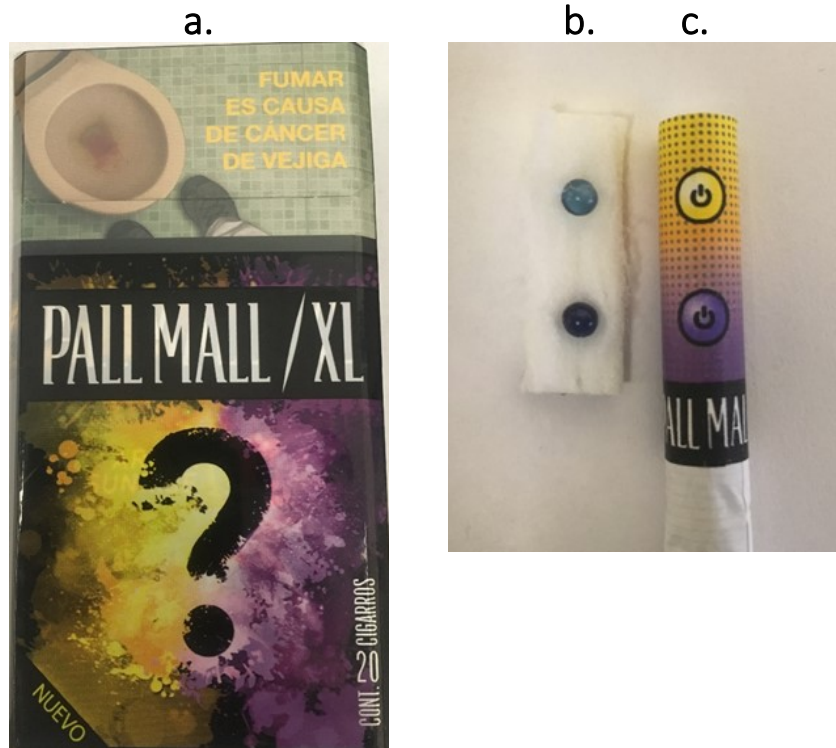

- a. Photo of pack (front);
- b. Opened filter showing two crushable flavor capsules (uncrushed);
- b. Filter end of cigarette.

Photos Copyright Portland State University, 2020.

## Figure S10.b. Pack #10. Pall Mall/XL "Mystery" (M+2)

TOFCs = total other flavour compounds; TFFCs = total fruit flavour compounds;  
TNMNFCCs = total non-menthol non-fruit flavour compounds.

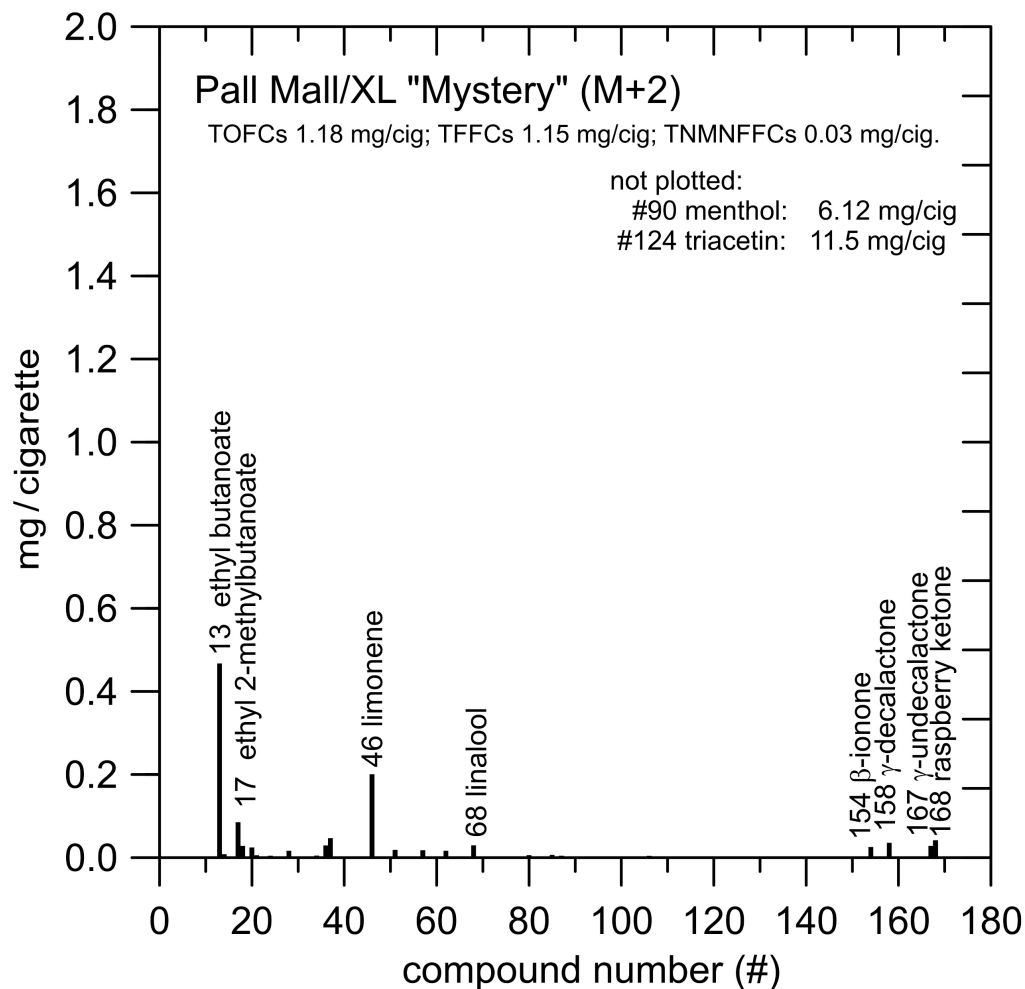

## Figure S11.a. Pack #11. Marlboro “Capsula Fresca” (M+1) (Mexico)

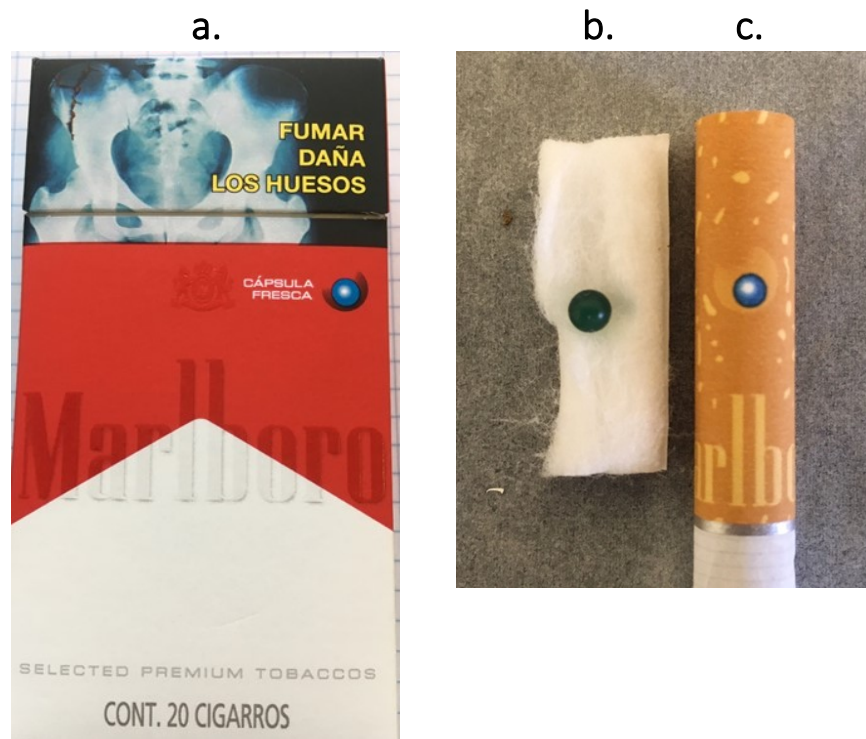

- a. Photo of pack (front);
- b. Opened filter showing one crushable flavor capsule (uncrushed);
- b. Filter end of cigarette.

Photos Copyright Portland State University, 2020.



## Figure S11.b. Pack #11. Marlboro "Capsula Fresca" (M+1)

TOFCs = total other flavour compounds; TFFCs = total fruit flavour compounds;  
TNMNFFCs = total non-menthol non-fruit flavour compounds.

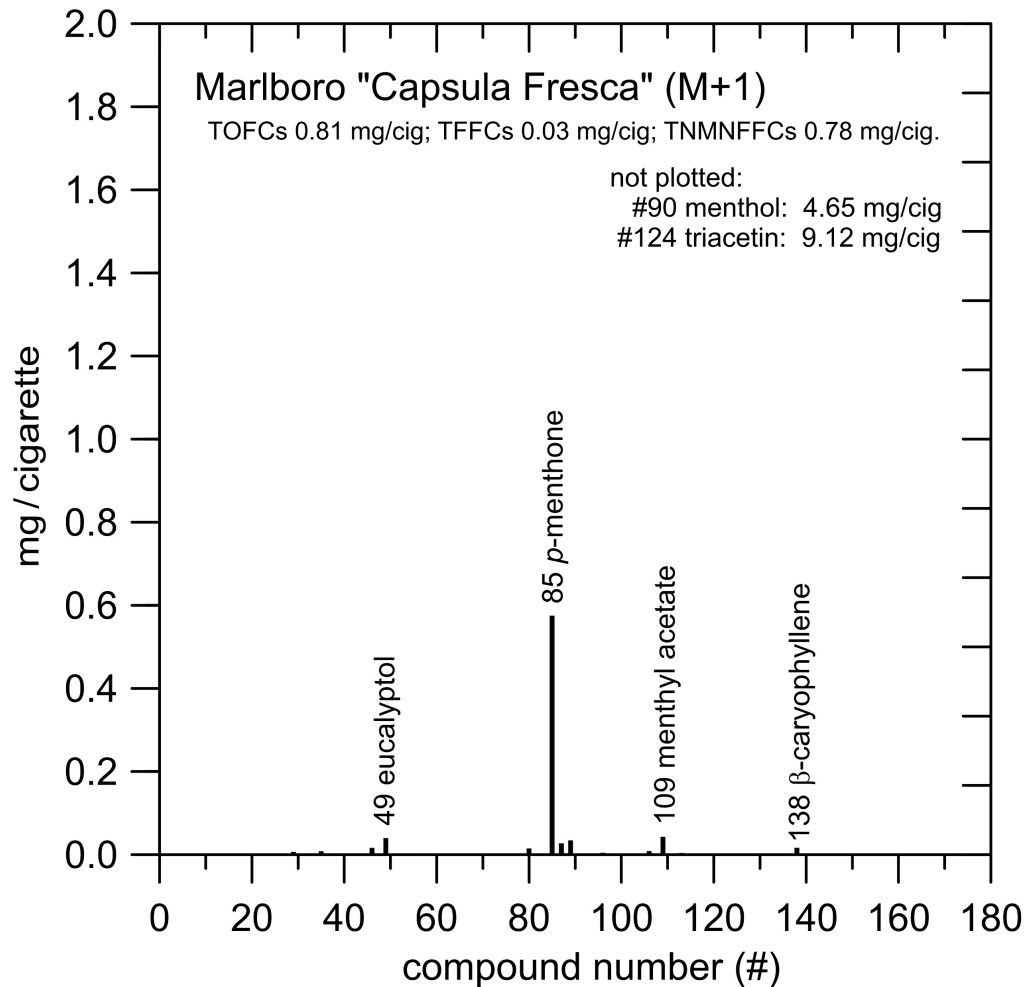

## Figure S12.a. Pack #12. Lucky Strike “Convertibles” purple (M+1) (Mexico)

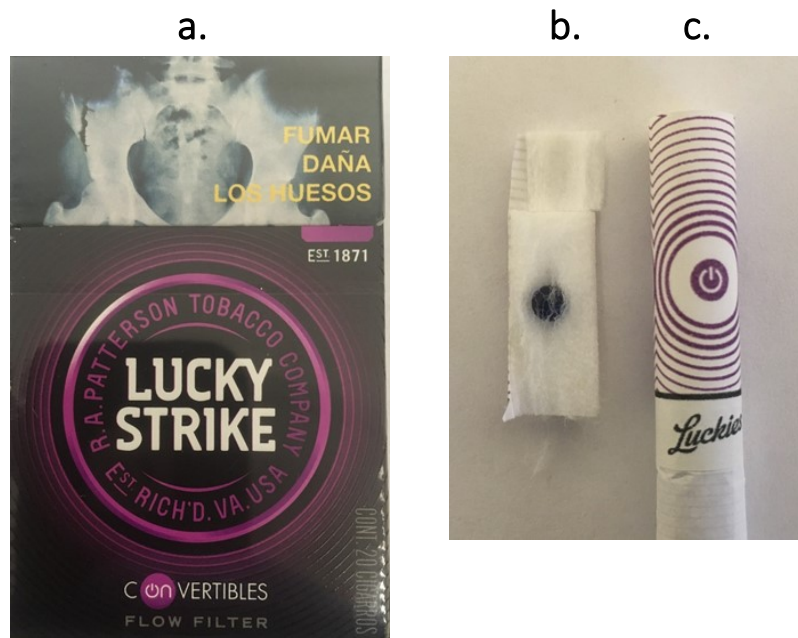

- a. Photo of pack (front);
- b. Opened filter showing one crushable flavor capsule (uncrushed);
- b. Filter end of cigarette.

Photos Copyright Portland State University, 2020.

## Figure S12.b. Pack #12. Lucky Strike "Convertibles" purple (M+1)

TOFCs = total other flavour compounds; TFFCs = total fruit flavour compounds;  
TNMNFFCs = total non-menthol non-fruit flavour compounds.

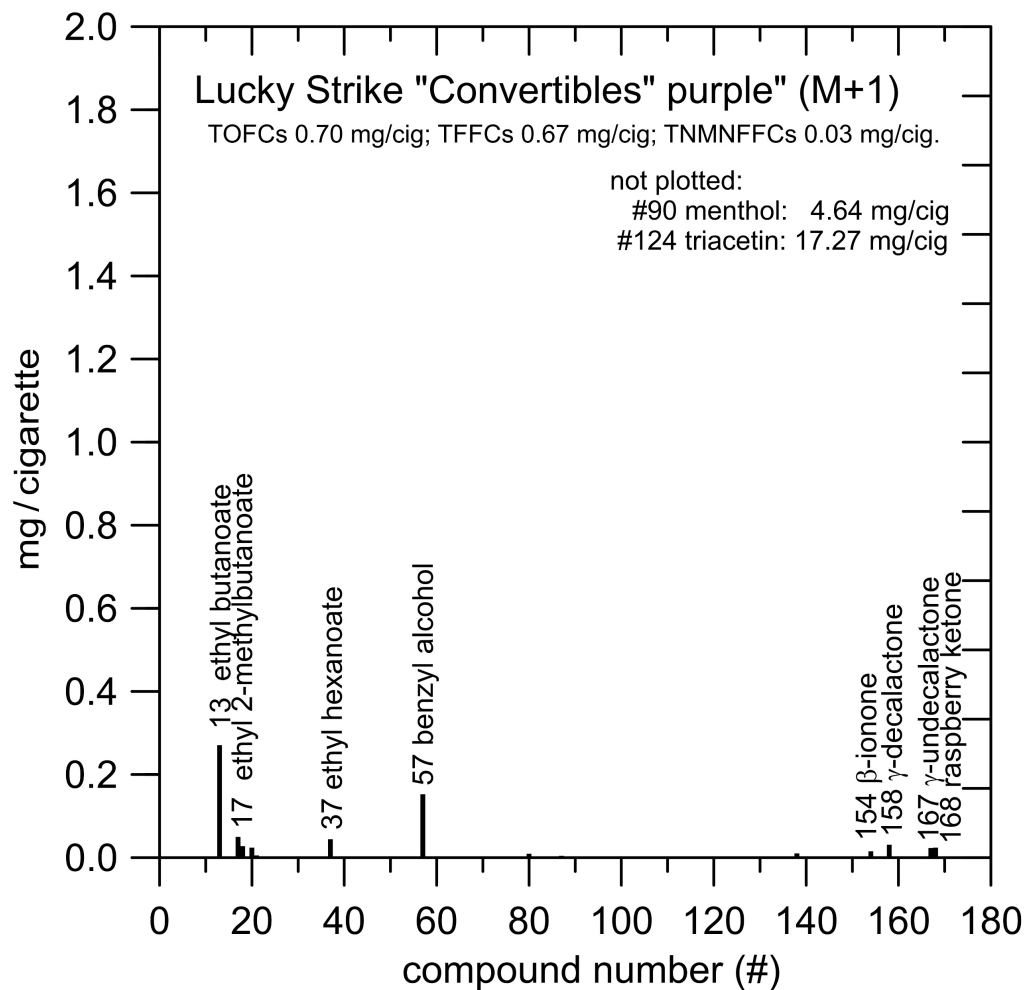

## Figure S13.a. Pack #13. Pall Mall/XL “Tokyo Midnight” (M+1) (Mexico)

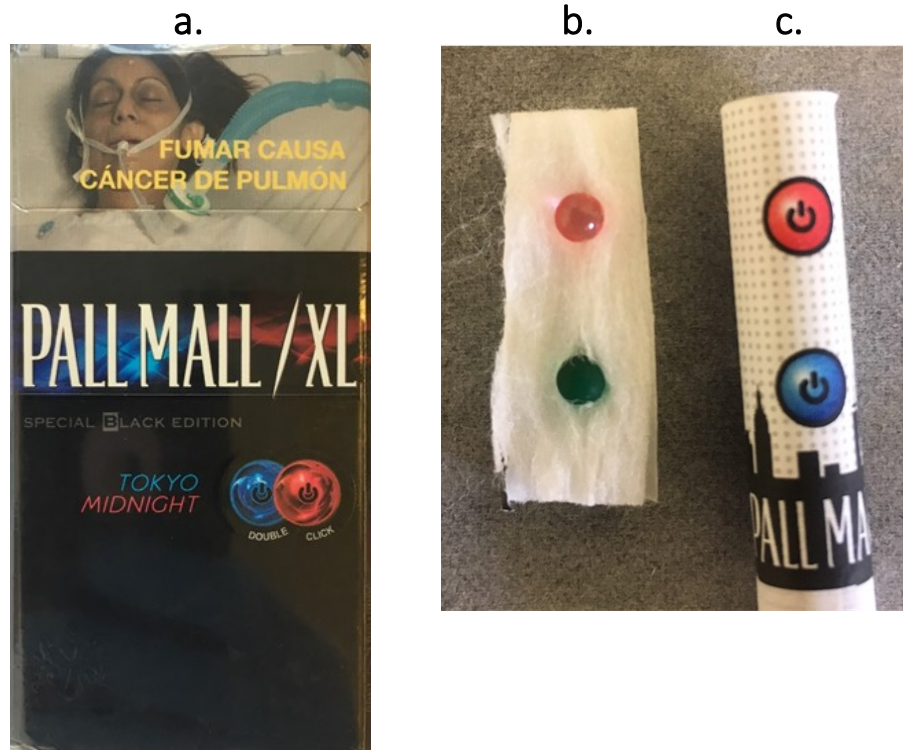

- a. Photo of pack (front);
- b. Opened filter showing two crushable flavor capsules (uncrushed);
- b. Filter end of cigarette.

Photos Copyright Portland State University, 2020.

## Figure S13.b. Pack #13. Pall Mall/XL "Tokyo Midnight" (M+1)

TOFCs = total other flavour compounds; TFFCs = total fruit flavour compounds;  
TNMNFCCs = total non-menthol non-fruit flavour compounds.

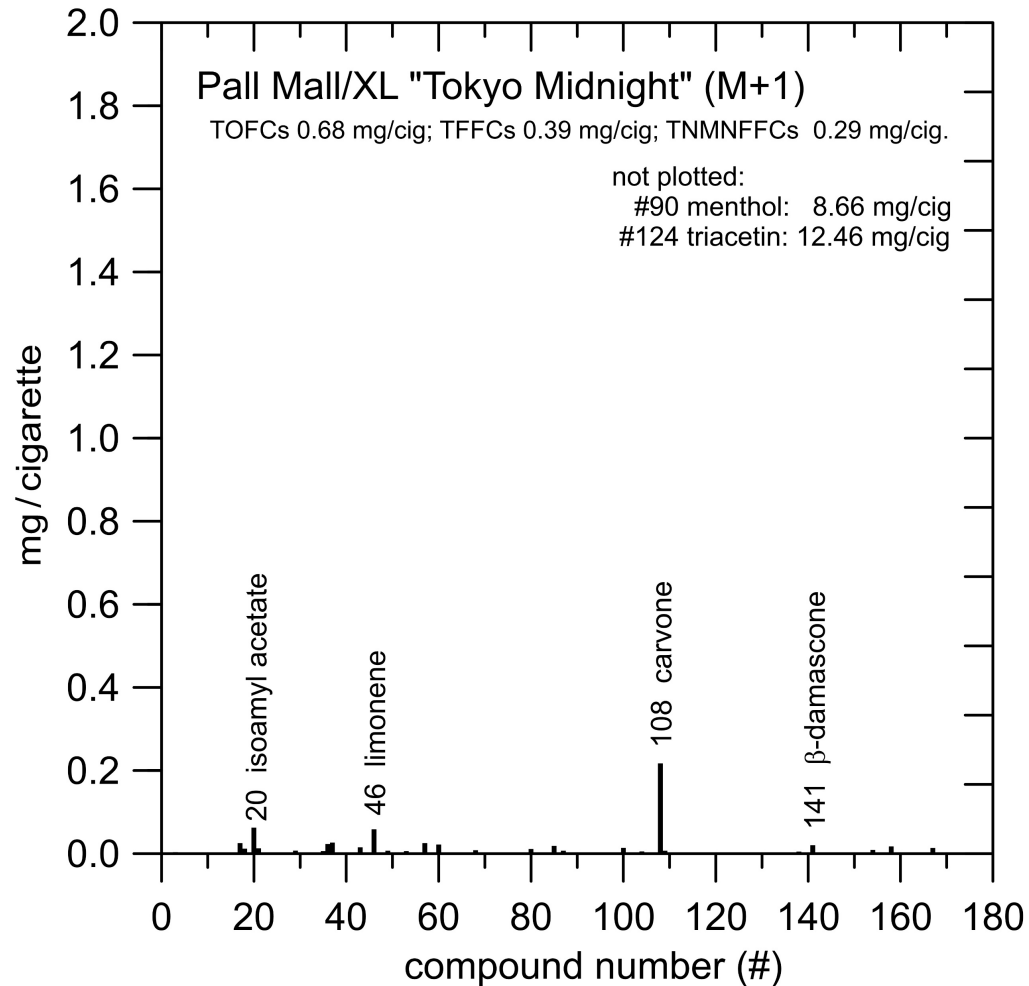

## Figure S14.a. Pack #14. Marlboro “Ruby Fusion Blast” (M+1) (Mexico)

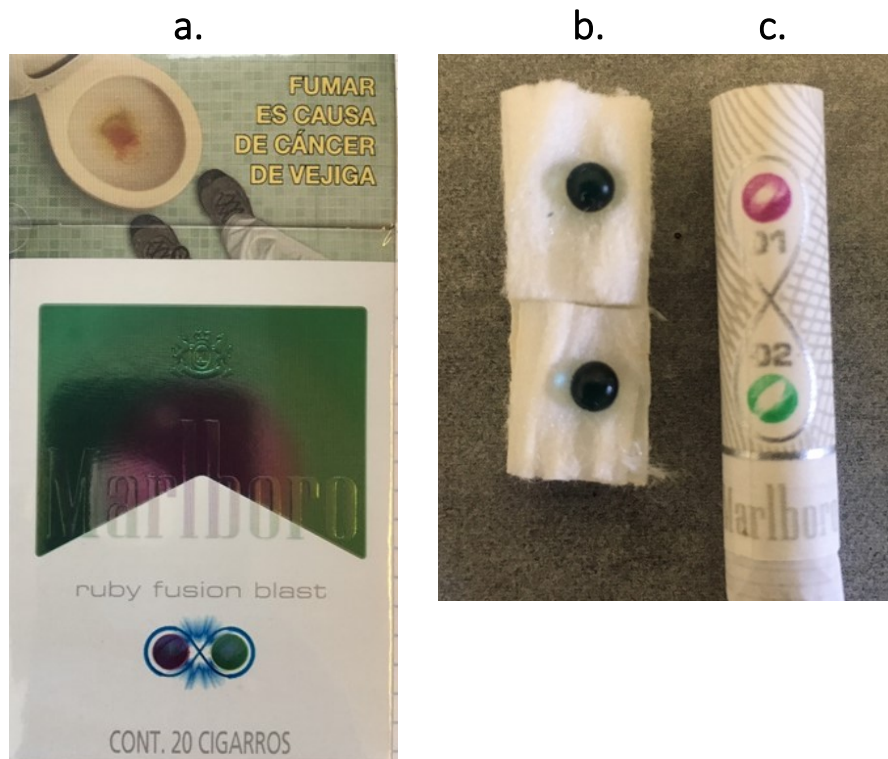

- a. Photo of pack (front);
- b. Opened filter showing two crushable flavor capsules (uncrushed);
- b. Filter end of cigarette.

Photos Copyright Portland State University, 2020.

## Figure S14.b. Pack #14. Marlboro "Ruby Fusion Blast" (M+1)

TOFCs = total other flavour compounds; TFFCs = total fruit flavour compounds;  
TNMNFCCs = total non-menthol non-fruit flavour compounds.

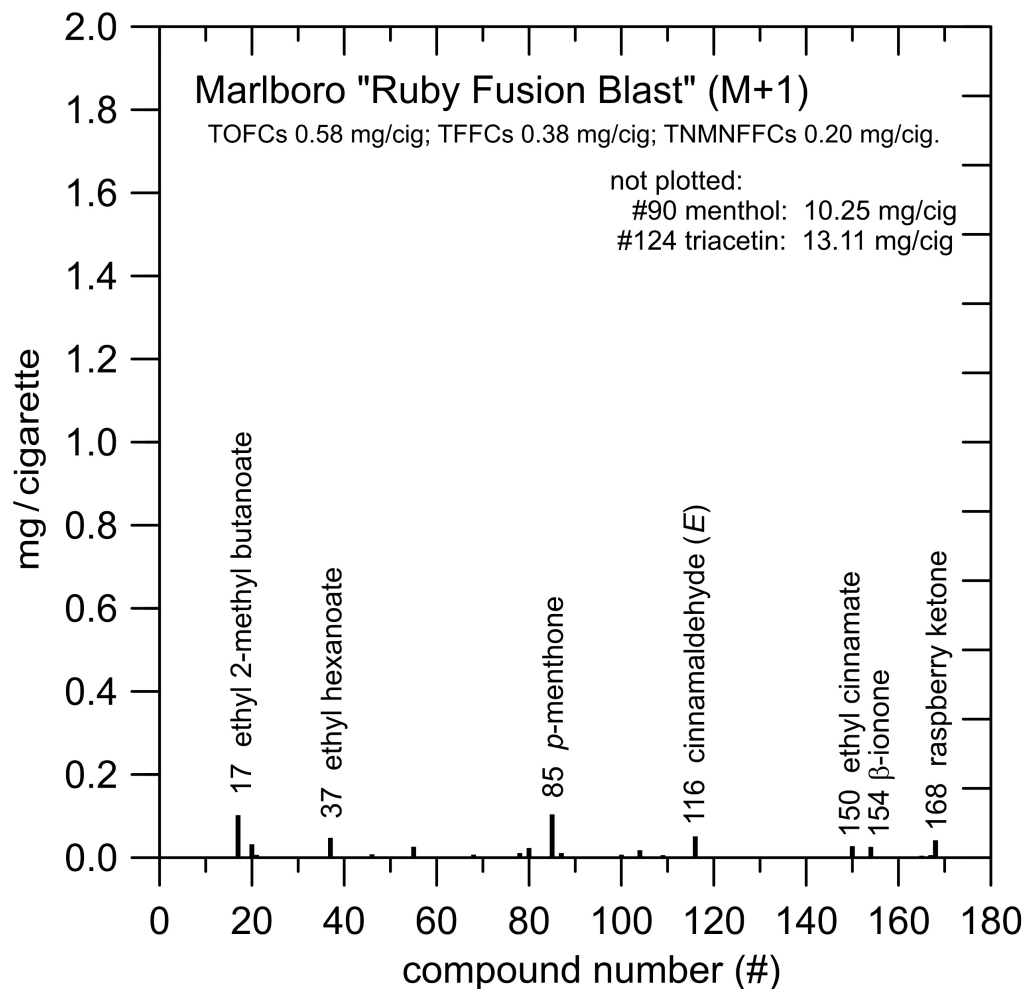

Figure S15.a. Pack #15. Pall Mall/XL “Black Edition Maui Crepuscule” (M+1) (Mexico)

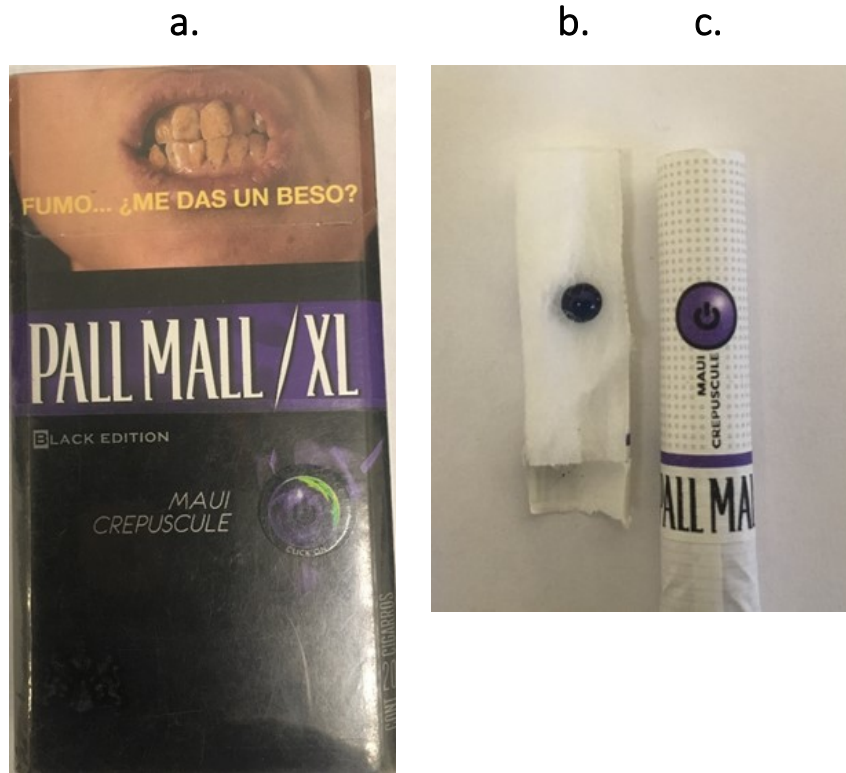

- a. Photo of pack (front);
- b. Opened filter showing one crushable flavor capsule (uncrushed);
- b. Filter end of cigarette.

Photos Copyright Portland State University, 2020.



## Figure S15.b. Pack #15. Pall Mall/XL "Black Edition Maui Crepuscule" (M+1)

TOFCs = total other flavour compounds; TFFCs = total fruit flavour compounds;  
TNMNFCCs = total non-menthol non-fruit flavour compounds.

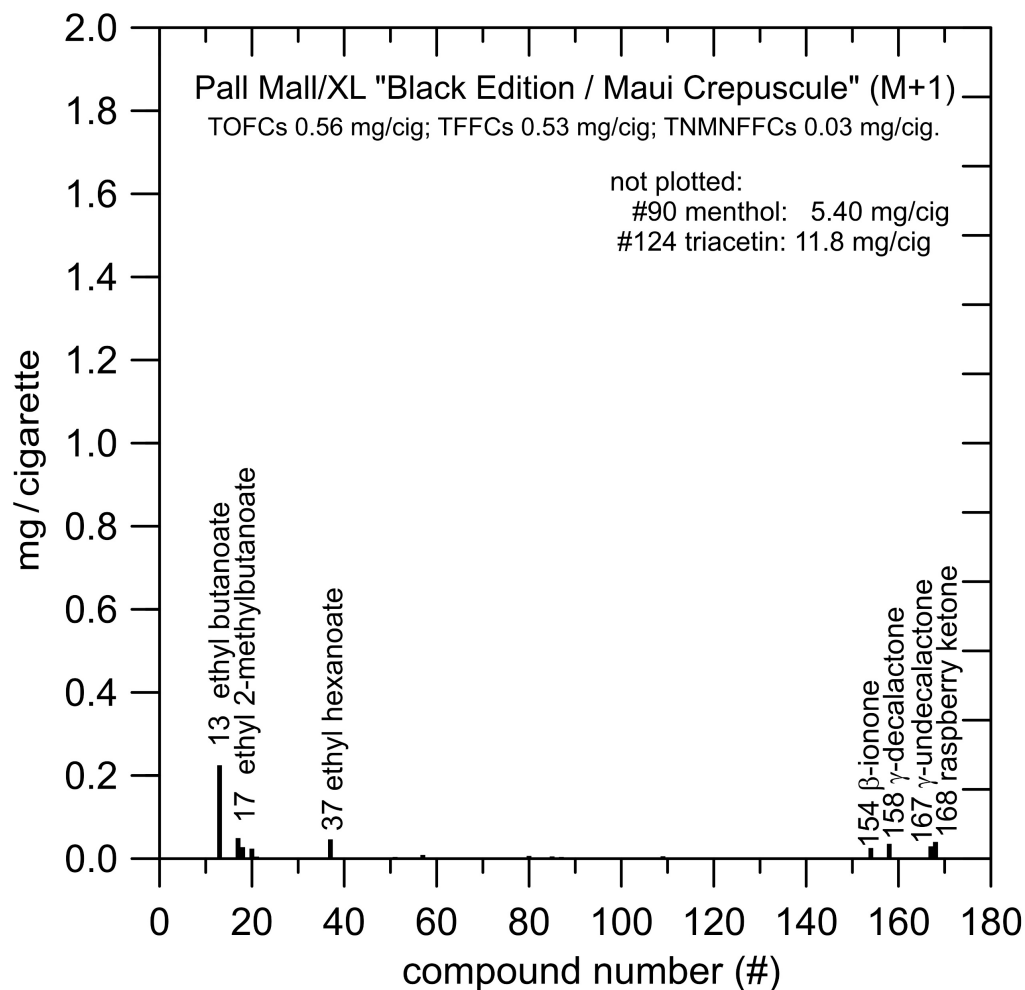

## Figure S16.a. Pack #16. Marlboro “Double Fusion Ruby” (M+1) (Mexico)

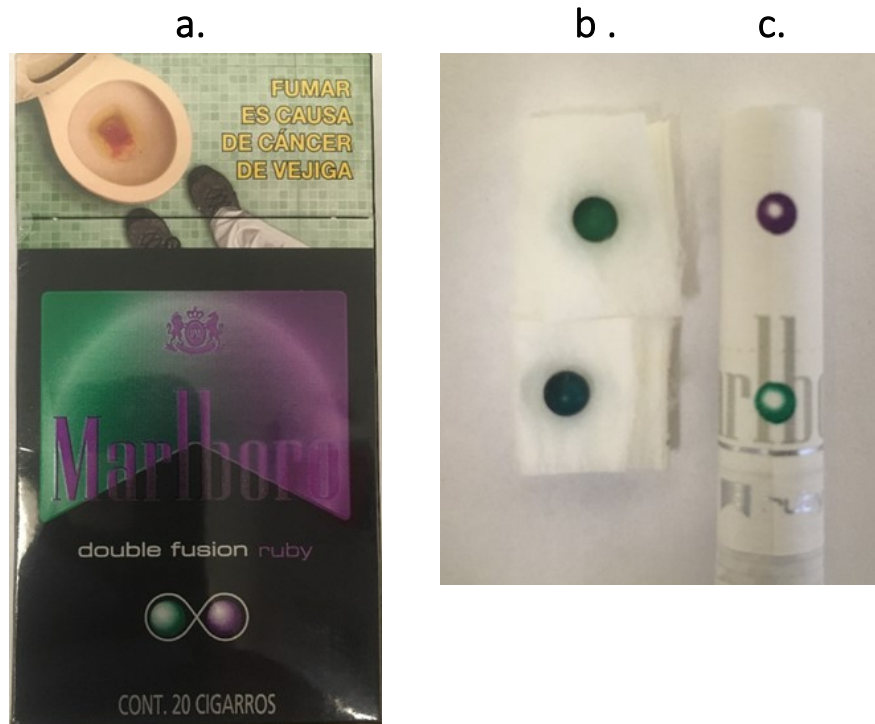

- a. Photo of pack (front);
- b. Opened filter showing two crushable flavor capsules (uncrushed);
- b. Filter end of cigarette.

Photos Copyright Portland State University, 2020.

## Figure S16.b. Pack #16. Marlboro "Double Fusion Ruby" (M+1)

TOFCs = total other flavour compounds; TFFCs = total fruit flavour compounds;  
TNMNFFCs = total non-menthol non-fruit flavour compounds.

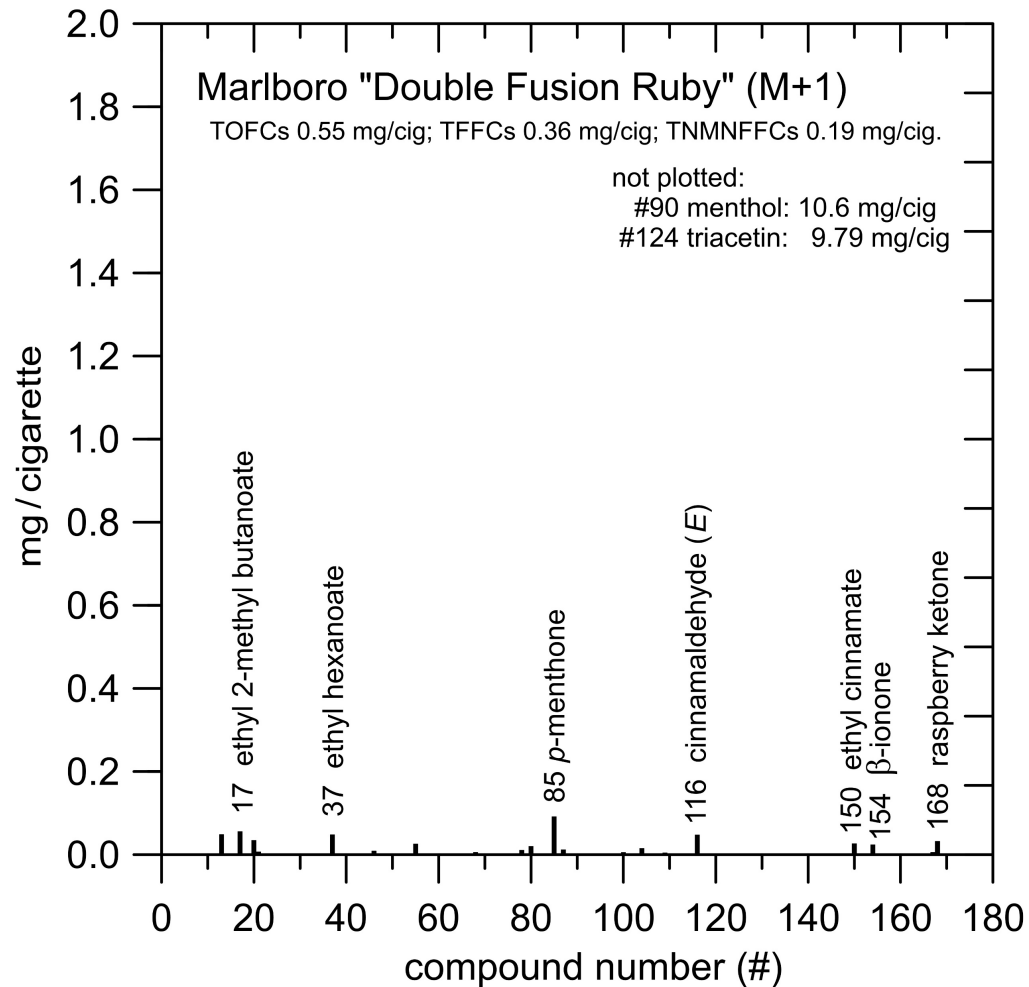

## Figure S17.a. Pack #17. Chesterfield “Caps Purple” (M+1) (Mexico)

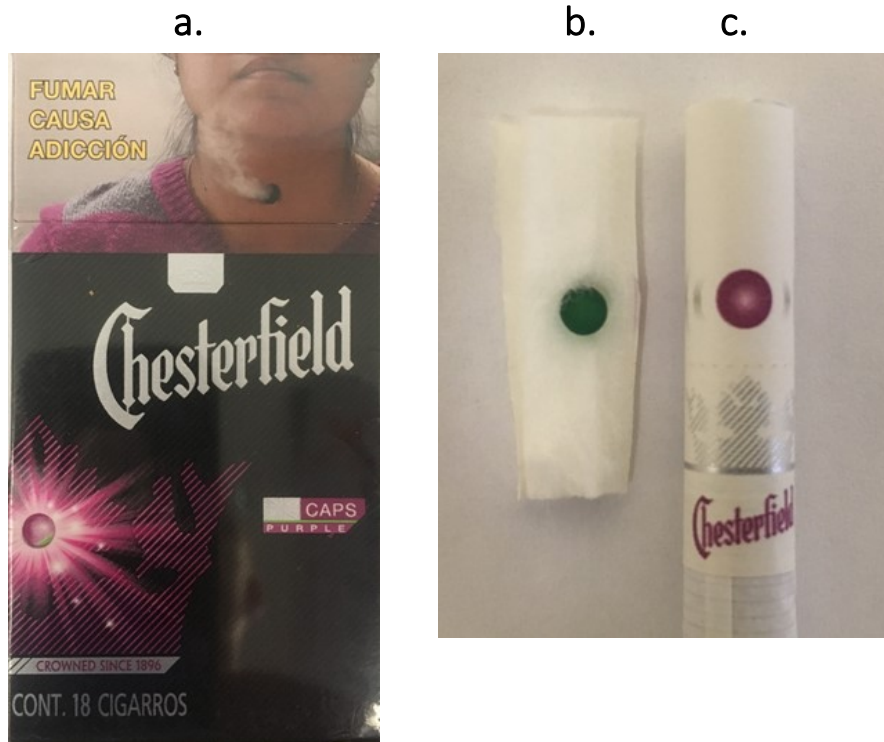

- a. Photo of pack (front);
- b. Opened filter showing one crushable flavor capsule (uncrushed);
- b. Filter end of cigarette.

Photos Copyright Portland State University, 2020.

## Figure S17.b. Pack #17. Chesterfield "Caps Purple" (M+1)

TOFCs = total other flavour compounds; TFFCs = total fruit flavour compounds;  
TNMNFCCs = total non-menthol non-fruit flavour compounds.

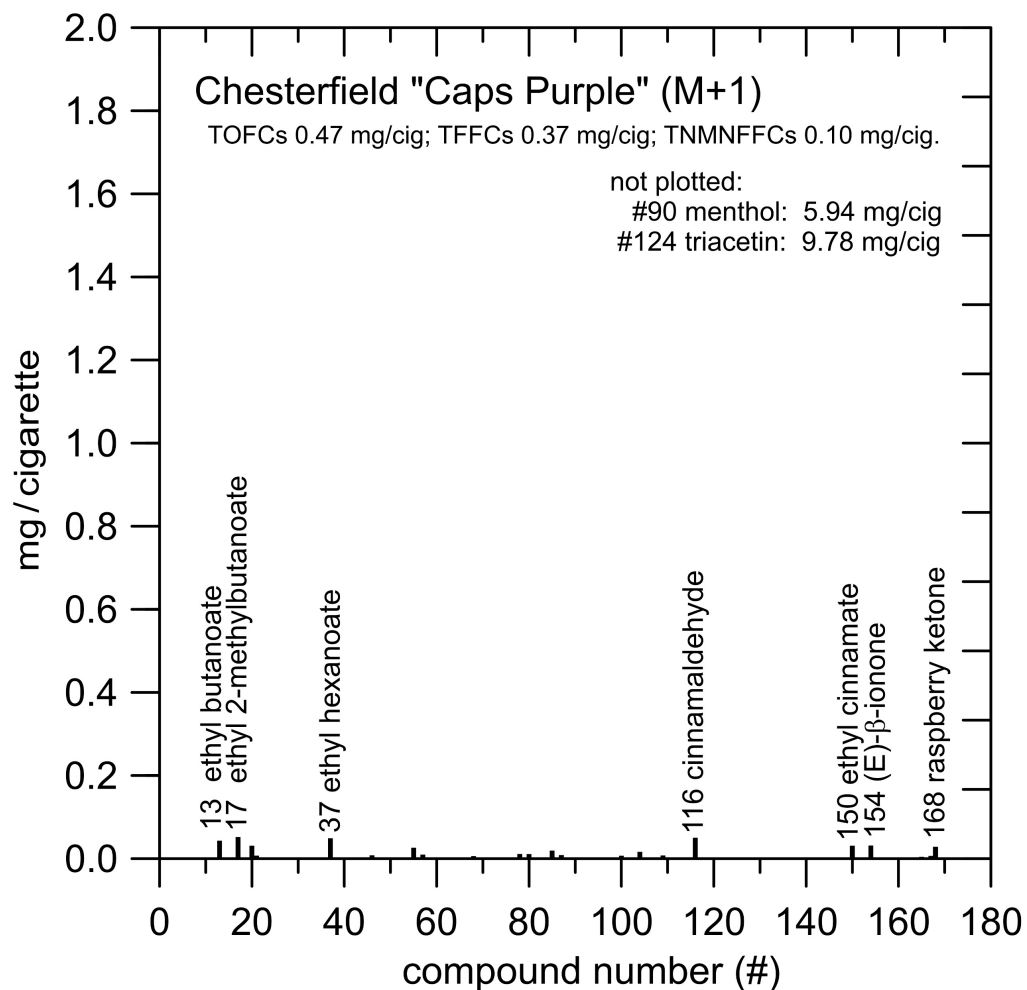

## Figure S18.a. Pack #18. Benson & Hedges “Crystal Violet” (M+1) (Mexico)

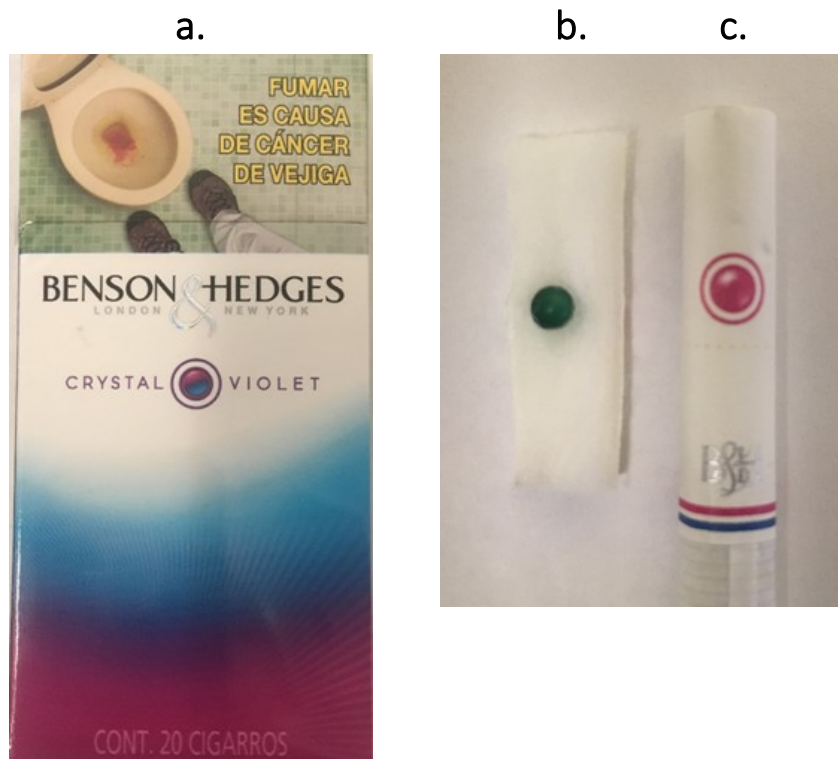

- a. Photo of pack (front);
- b. Opened filter showing one crushable flavor capsule (uncrushed);
- b. Filter end of cigarette.

Photos Copyright Portland State University, 2020.

## Figure S18.b. Pack #18. Benson & Hedges "Crystal Violet" (M+1)

TOFCs = total other flavour compounds; TFFCs = total fruit flavour compounds;  
TNMNFCCs = total non-menthol non-fruit flavour compounds.

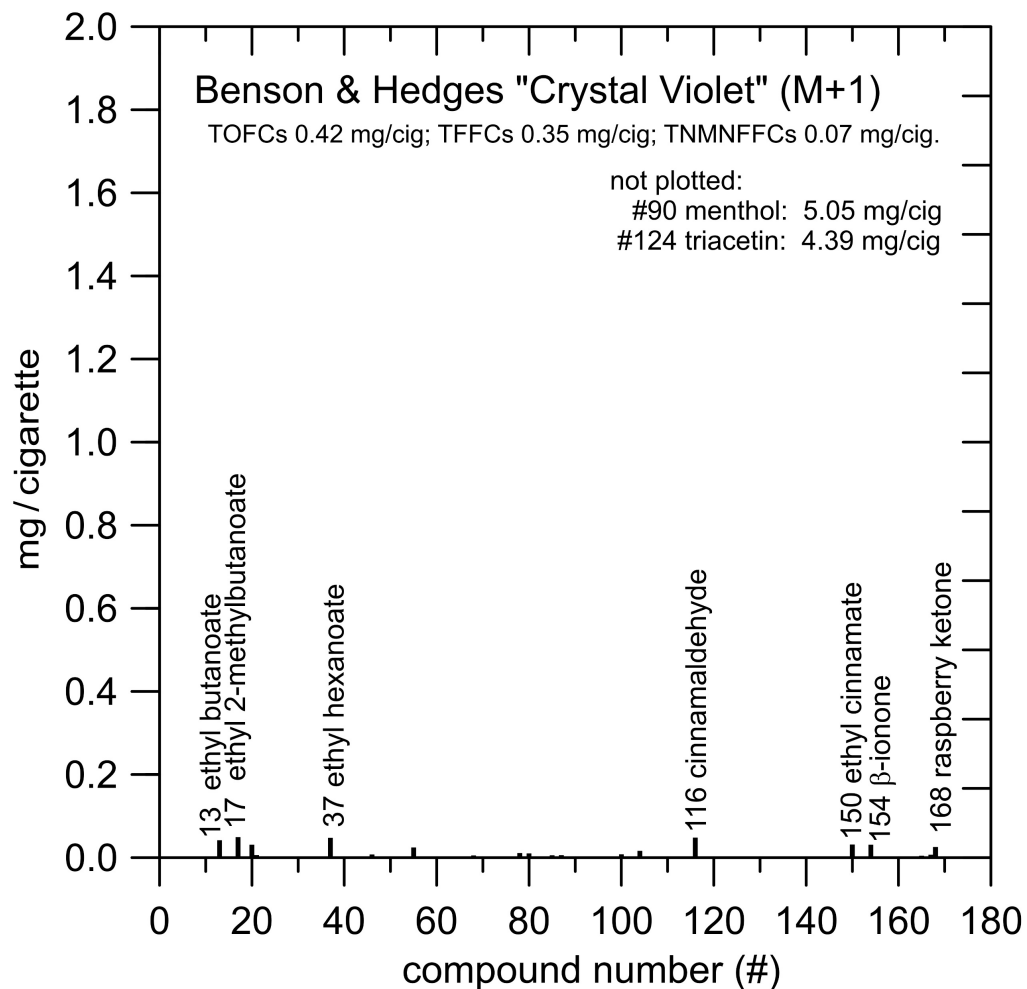

Figure S19.a. Pack #19. Pall Mall/XL “Black Edition Ibiza Sunset” (M+1) (Mexico)

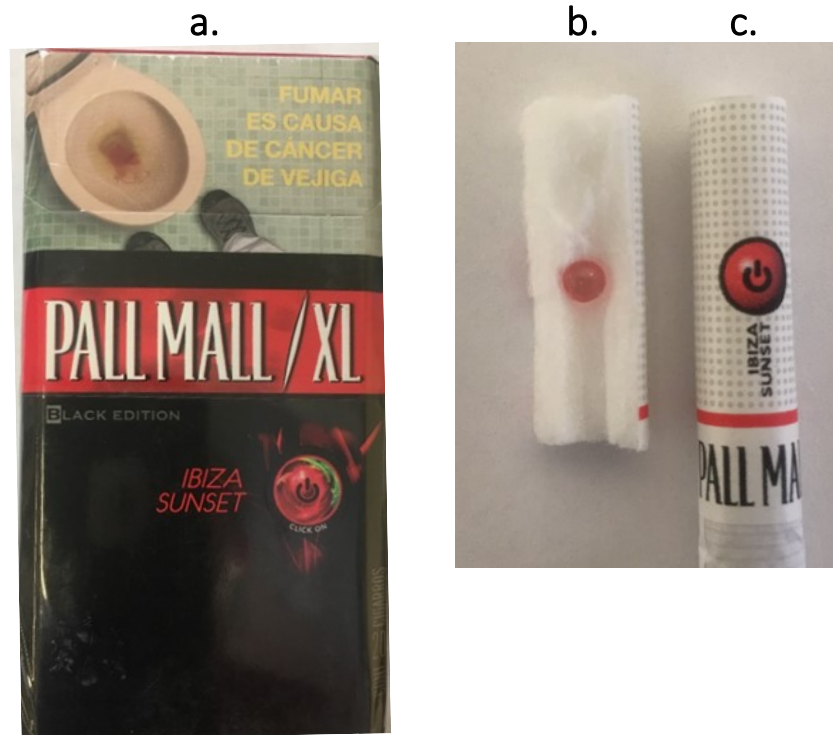

- a. Photo of pack (front);
- b. Opened filter showing one crushable flavor capsule (uncrushed);
- b. Filter end of cigarette.

Photos Copyright Portland State University, 2020.



## Figure S19.b. Pack #19. Pall Mall/XL "Black Edition Ibiza Sunset" (M+1)

TOFCs = total other flavour compounds; TFFCs = total fruit flavour compounds;  
TNMNFCCs = total non-menthol non-fruit flavour compounds.

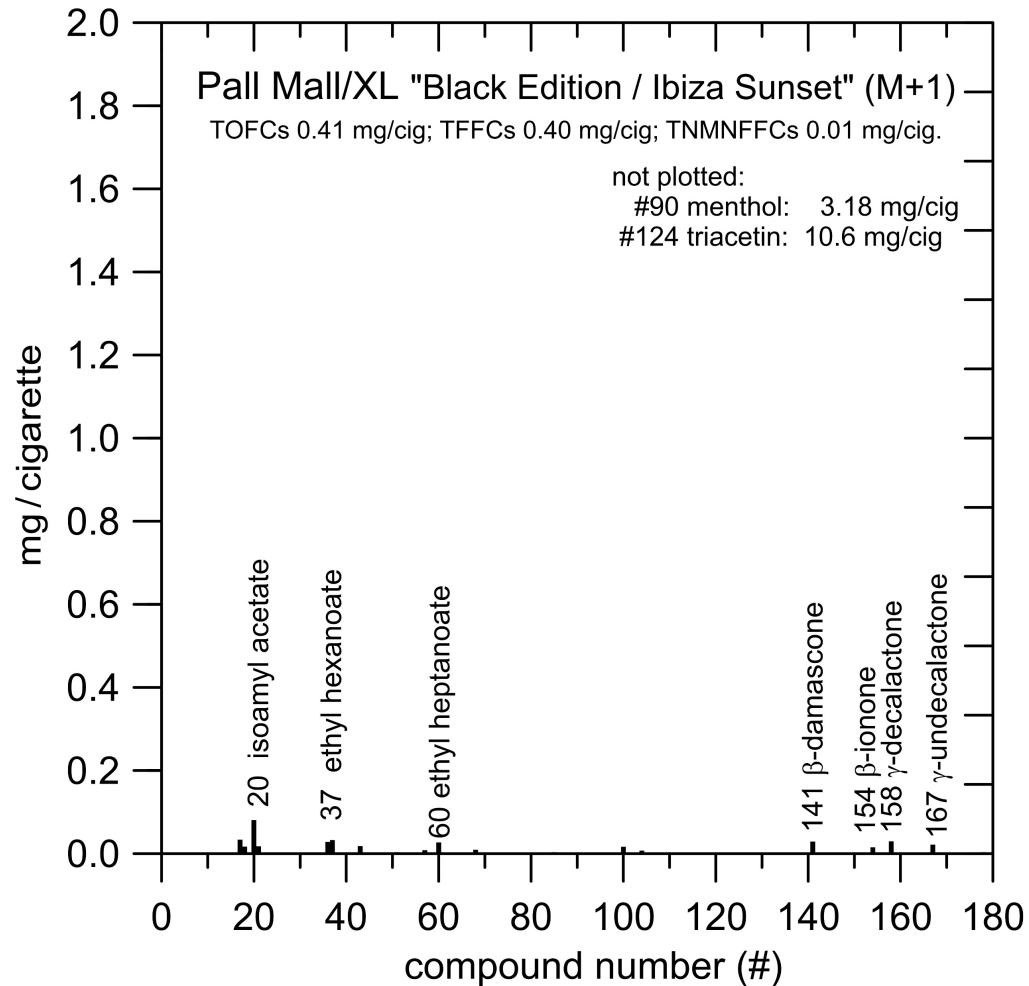

Figure S20.a. Pack #20. Pall Mall “Wave” (M+1)  
(Mexico)

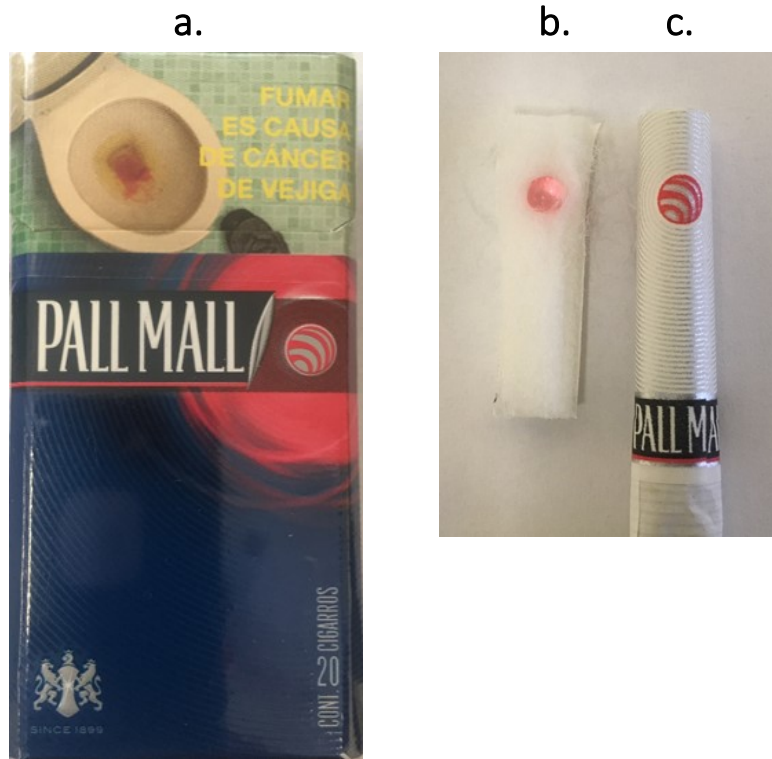

- a. Photo of pack (front);
- b. Opened filter showing one crushable flavor capsule (uncrushed);
- b. Filter end of cigarette.

Photos Copyright Portland State University, 2020.

## Figure S20.b. Pack #20. Pall Mall "Wave" (M+1)

TOFCs = total other flavour compounds; TFFCs = total fruit flavour compounds;  
TNMNFCCs = total non-menthol non-fruit flavour compounds.

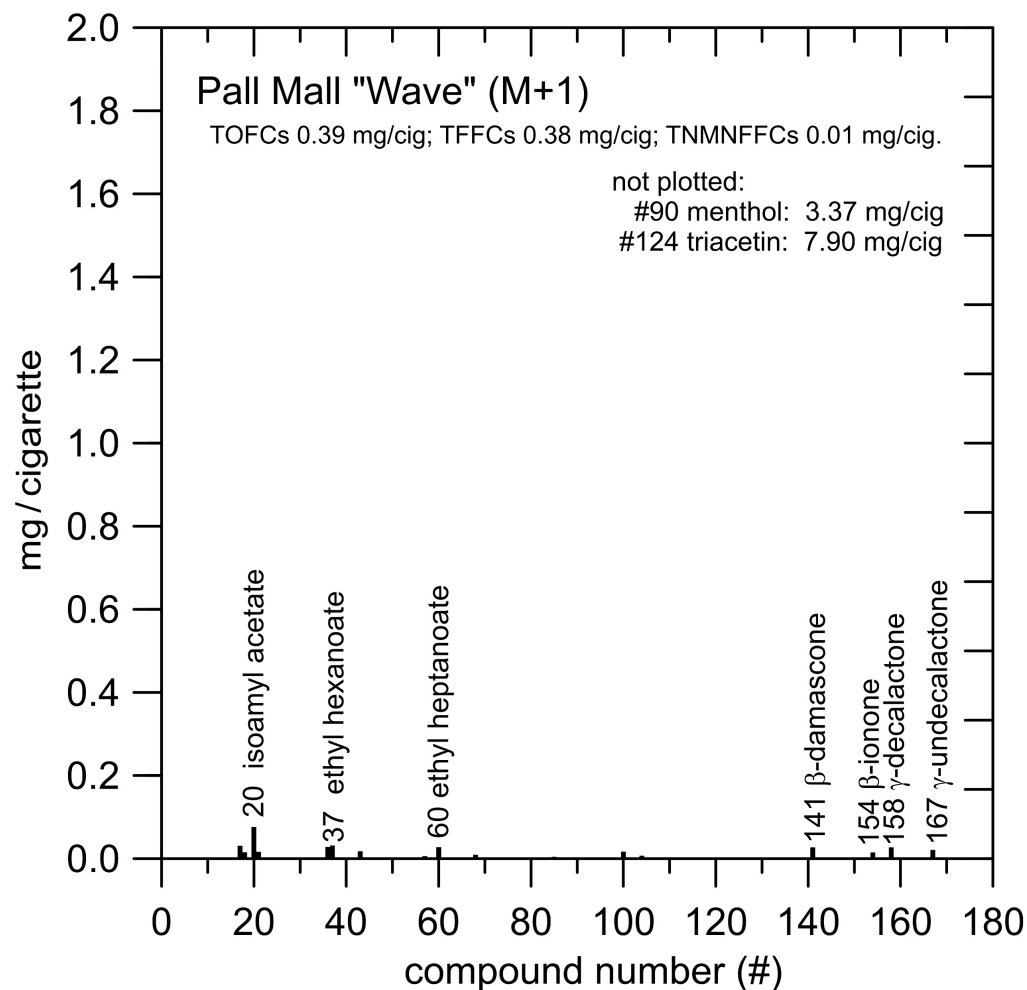

Figure S21.a. Pack #21. Pall Mall/XL “Mykonos Nightfall” (M+1)  
(Mexico)

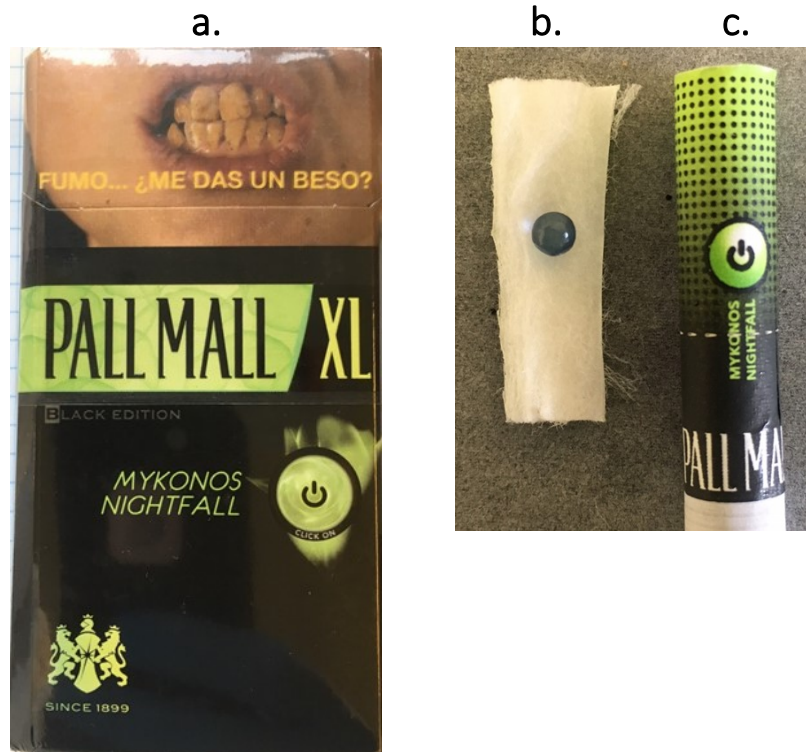

- a. Photo of pack (front);
- b. Opened filter showing one crushable flavor capsule (uncrushed);
- b. Filter end of cigarette.

Photos Copyright Portland State University, 2020.

## Figure S21.b. Pack #21. Pall Mall/XL "Mykonos Nightfall" (M+1)

TOFCs = total other flavour compounds; TFFCs = total fruit flavour compounds;  
TNMNFFCs = total non-menthol non-fruit flavour compounds.

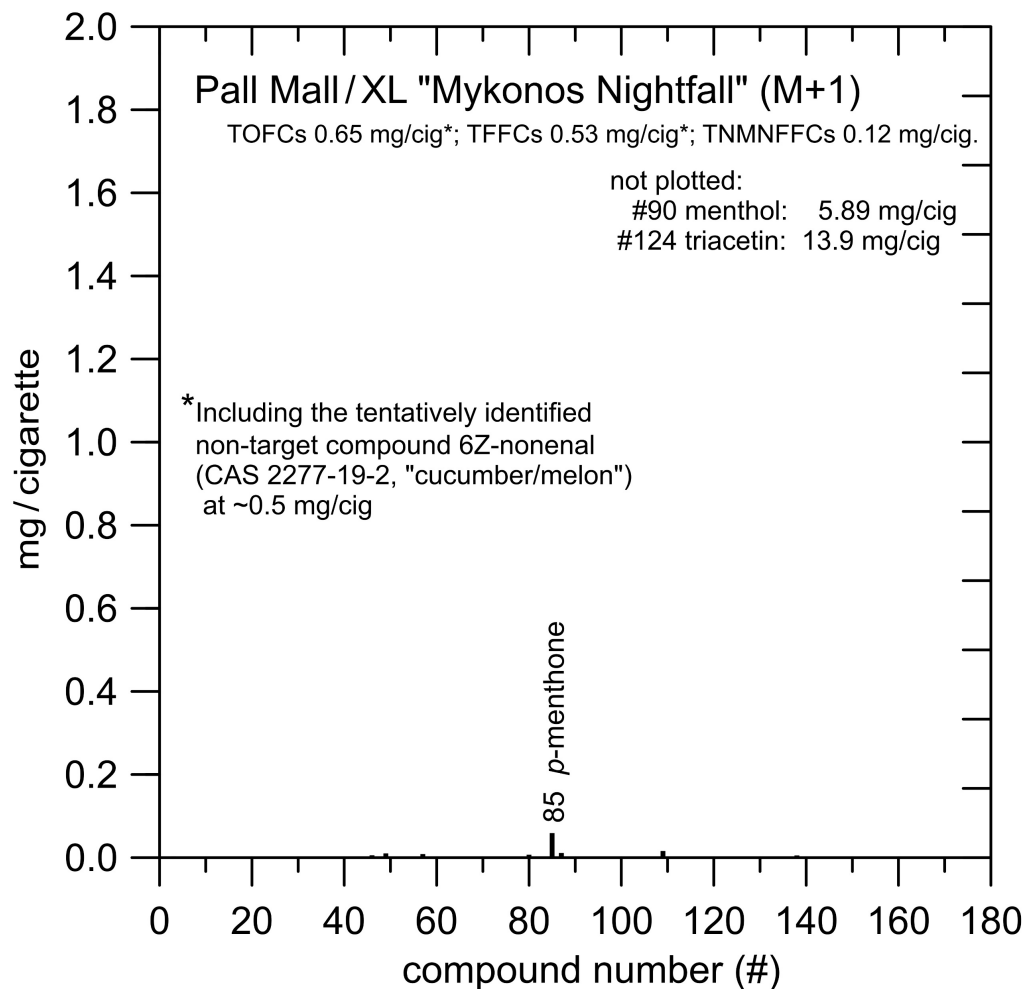

## Figure S22.a. Pack #22. Benson & Hedges “Crystal Blue” (M) (Mexico)

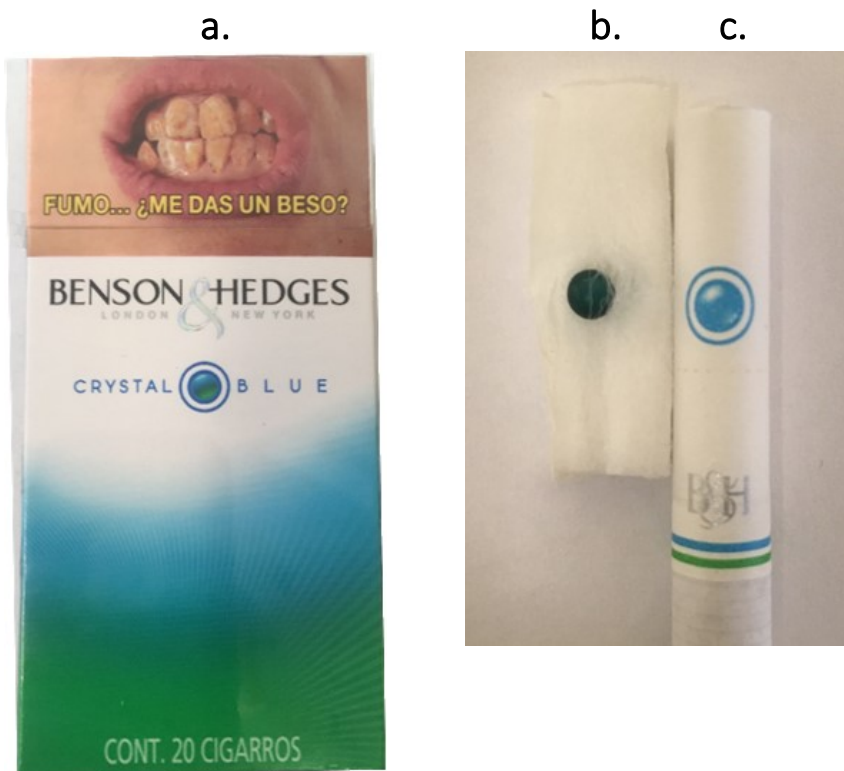

- a. Photo of pack (front);
- b. Opened filter showing one crushable flavor capsule (uncrushed);
- b. Filter end of cigarette.

Photos Copyright Portland State University, 2020.

## Figure S22.b. Pack #22. Benson & Hedges "Crystal Blue" (M)

TOFCs = total other flavour compounds; TFFCs = total fruit flavour compounds;  
TNMNFCCs = total non-menthol non-fruit flavour compounds.

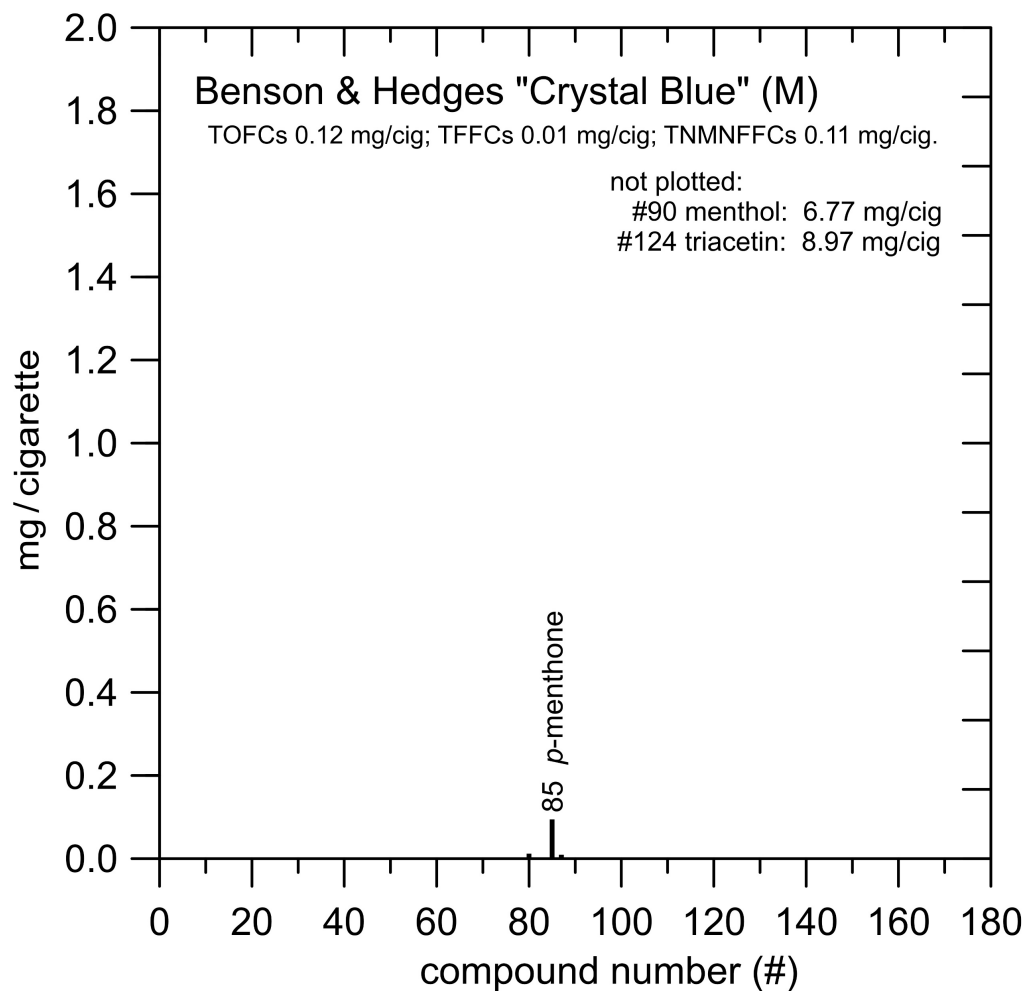

## Figure S23.a. Pack #23. Next “Green” (NF) (Canada)

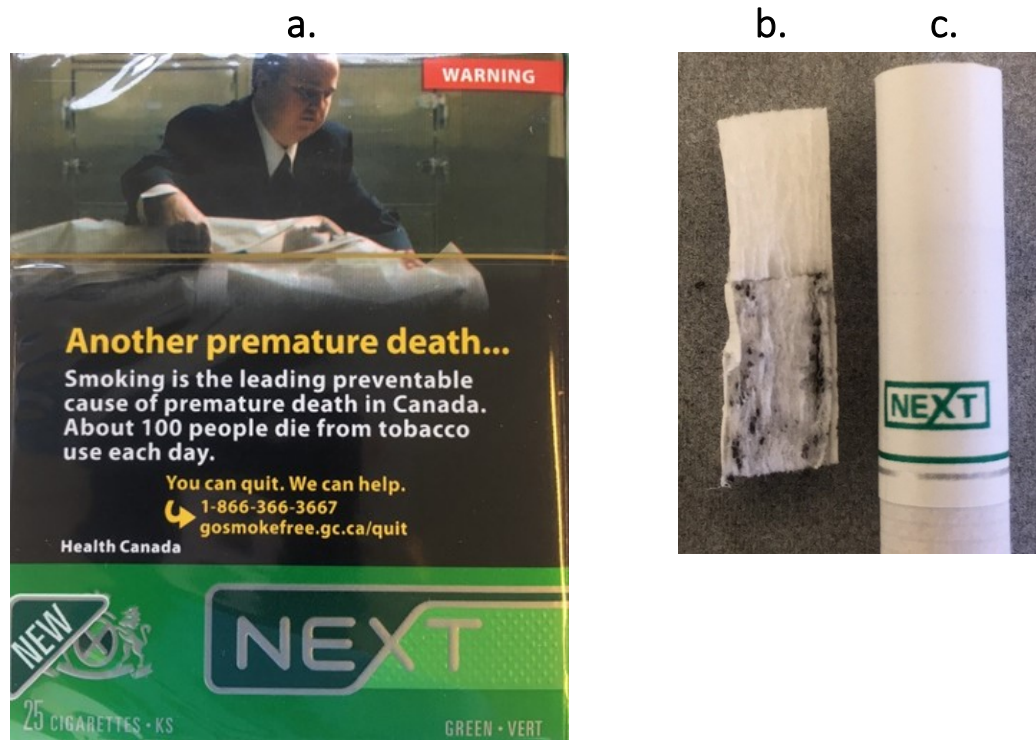

- a. Photo of pack (front);
- b. Opened filter showing a black powder (likely activated charcoal);
- b. Filter end of cigarette.

Photos Copyright Portland State University, 2020.



## Figure S23.b. Pack #23. Next "Green" (NF)

TOFCs = total other flavour compounds; TFFCs = total fruit flavour compounds;  
TNMNFFCs = total non-menthol non-fruit flavour compounds.

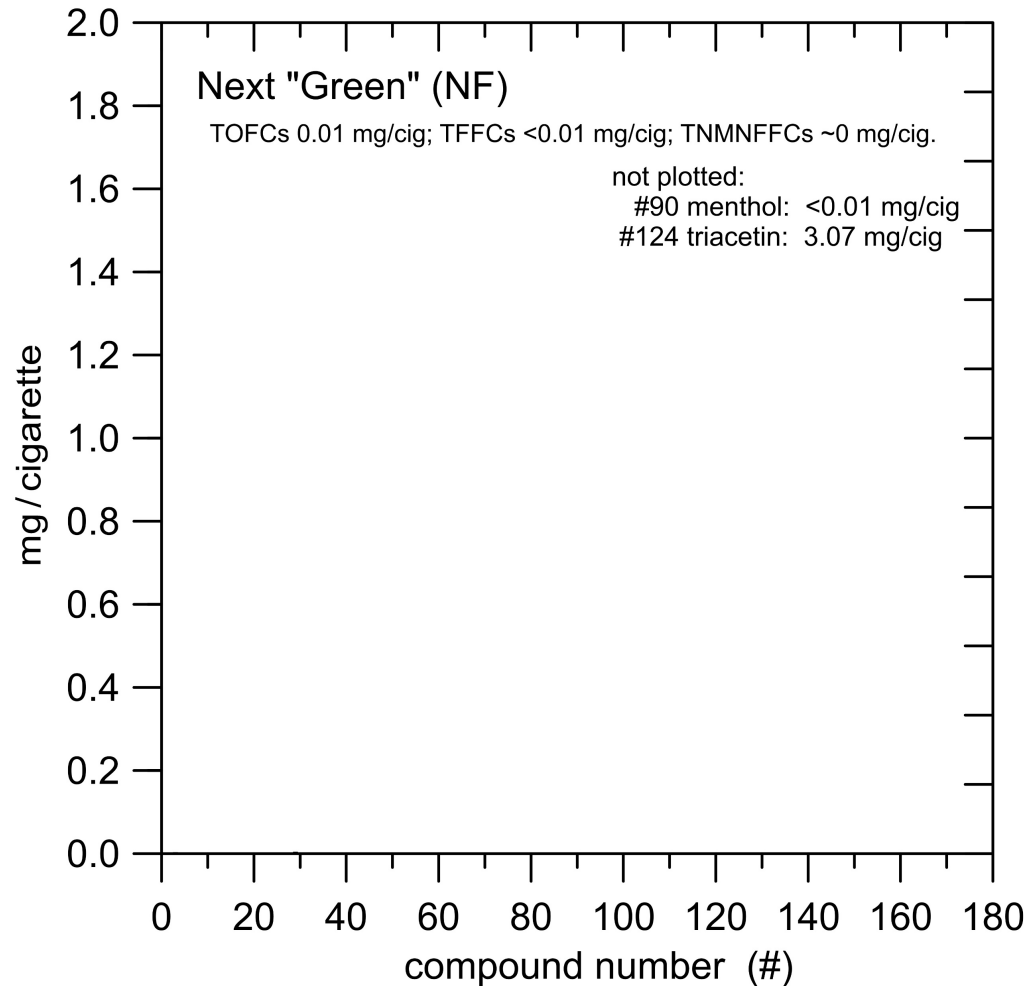

## Figure S24.a. Pack #24. John Player “Choice” (NF) (Canada)

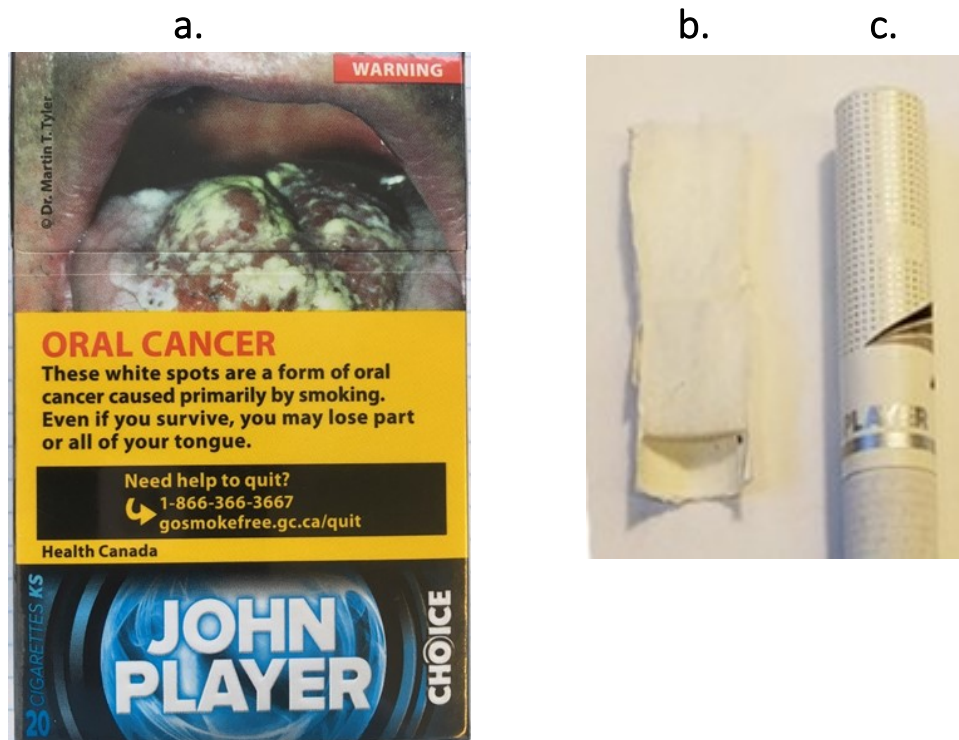

- a. Photo of pack (front);
- b. Opened filter;
- b. Filter end of cigarette.

Photos Copyright Portland State University, 2020.

## Figure S24.b. Pack #24. John Player "Choice" (NF)

TOFCs = total other flavour compounds; TFFCs = total fruit flavour compounds;  
TNMNFCCs = total non-menthol non-fruit flavour compounds.

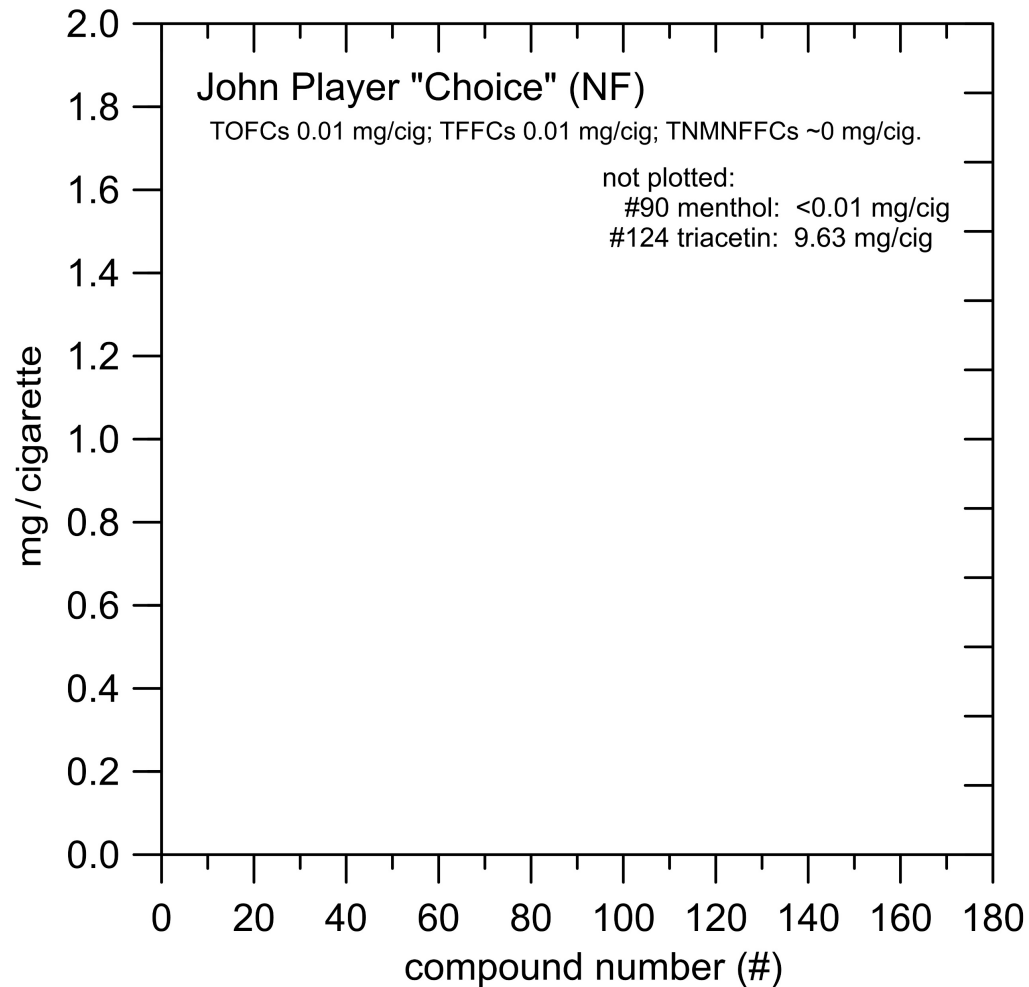

## Figure S25.a. Pack #25. Benson & Hedges “Unison” (NF) (Canada)

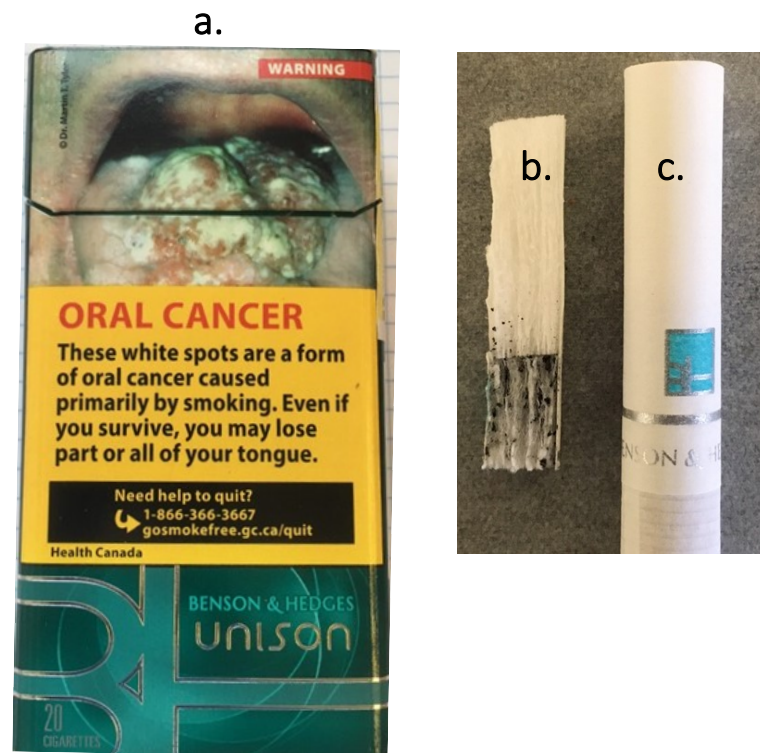

- a. Photo of pack (front);
- b. Opened filter showing a black powder (likely activated charcoal);
- b. Filter end of cigarette.

Photos Copyright Portland State University, 2020.

## Figure S25.b. Pack #25. Benson & Hedges "Unison" (NF)

TOFCs = total other flavour compounds; TFFCs = total fruit flavour compounds;  
TNMNFCCs = total non-menthol non-fruit flavour compounds.

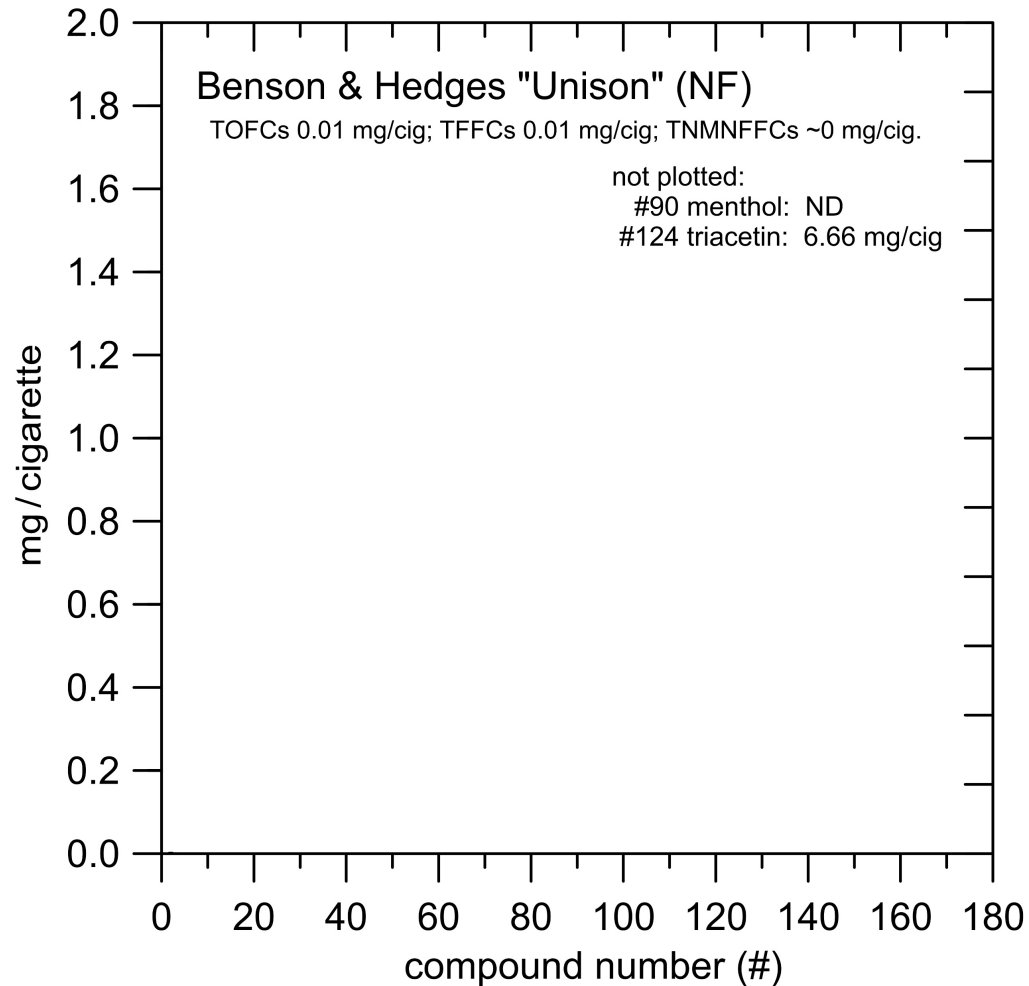

## Figure S26.a. Pack #26. Camel “North, Aqua Filter” (NF) (Canada)

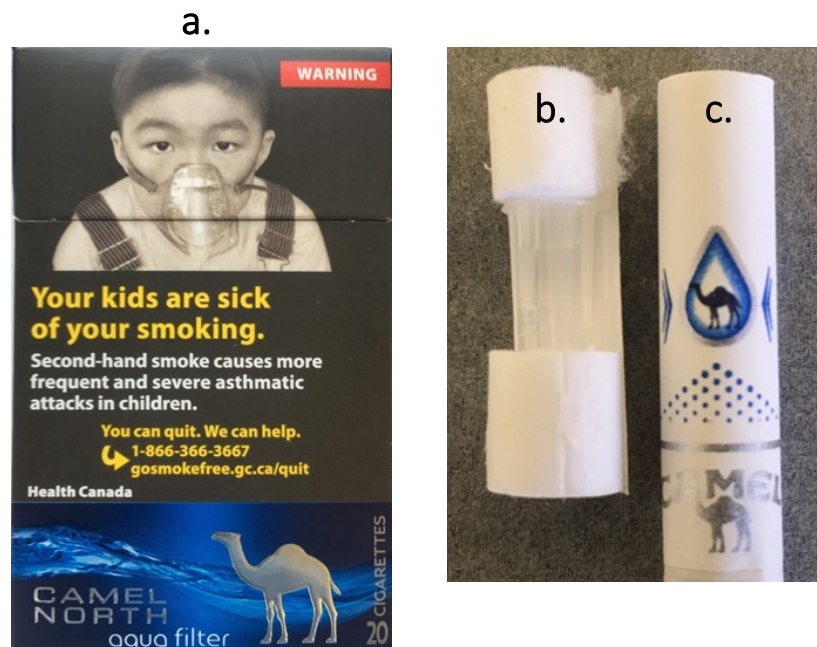

- a. Photo of pack (front);
- b. Opened filter showing cavity;
- b. Filter end of cigarette.

Photos Copyright Portland State University, 2020.

## Figure S26.b. Pack #26. Camel "North, Aqua Filter" (NF)

TOFCs = total other flavour compounds; TFFCs = total fruit flavour compounds;  
TNMNFFCs = total non-menthol non-fruit flavour compounds.

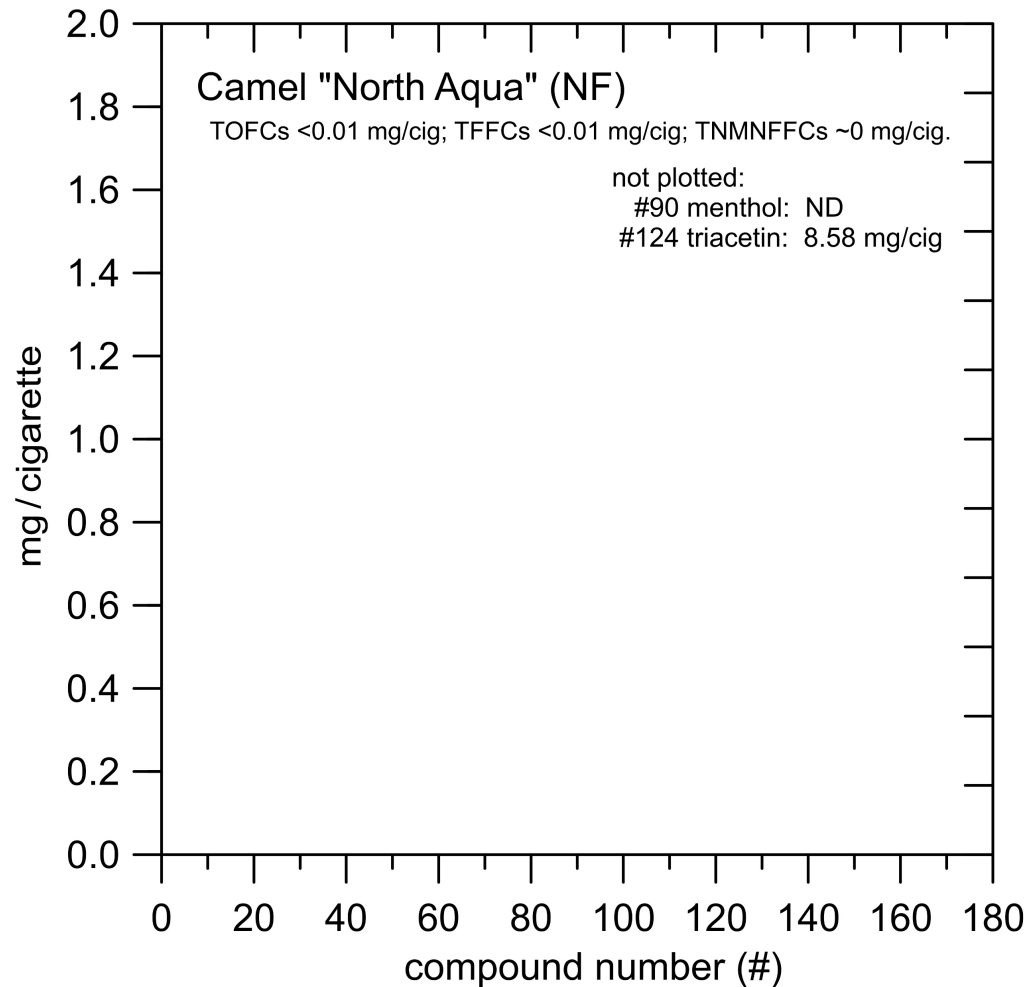

## Figure S27.a. Pack #27. du Maurier “Nano Blue” (NF) (Canada)

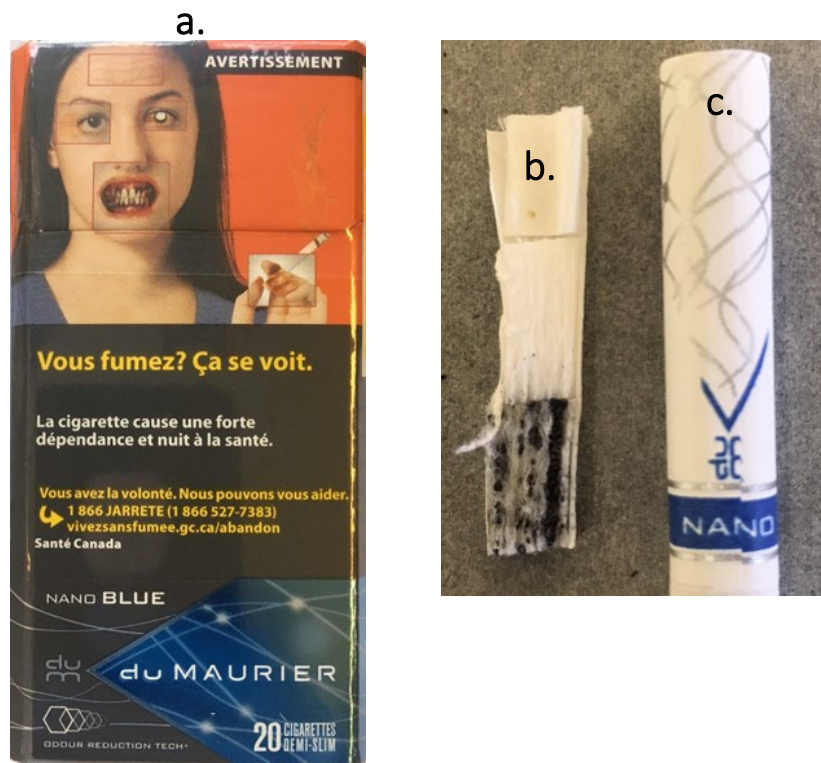

- a. Photo of pack (front);
- b. Opened filter showing a black powder (likely activated charcoal);
- b. Filter end of cigarette.

Photos Copyright Portland State University, 2020.



## Figure S27.b. Pack #27. du Maurier "Nano Blue" (NF)

TOFCs = total other flavour compounds; TFFCs = total fruit flavour compounds;  
TNMNFFCs = total non-menthol non-fruit flavour compounds.

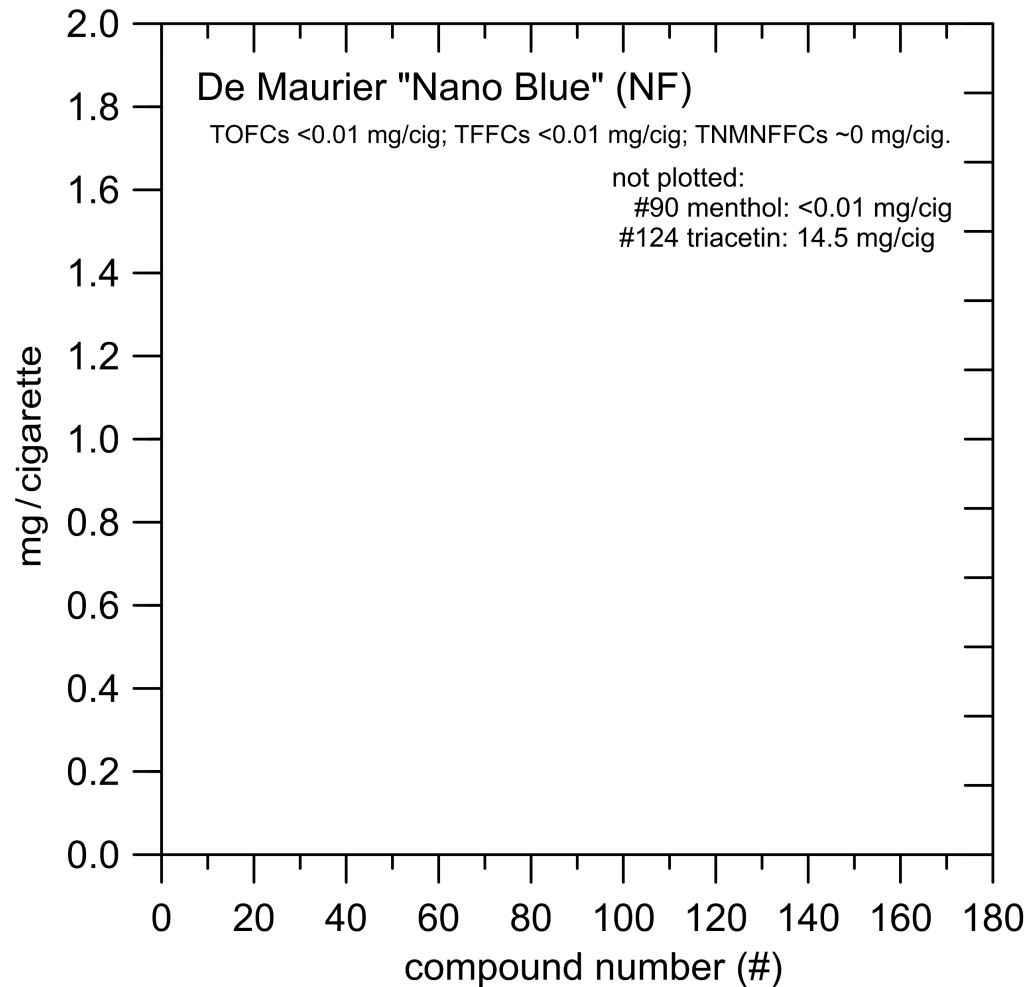

Figure S28. Triacetin (mg/cigarette) vs. menthol (mg/cigarette).

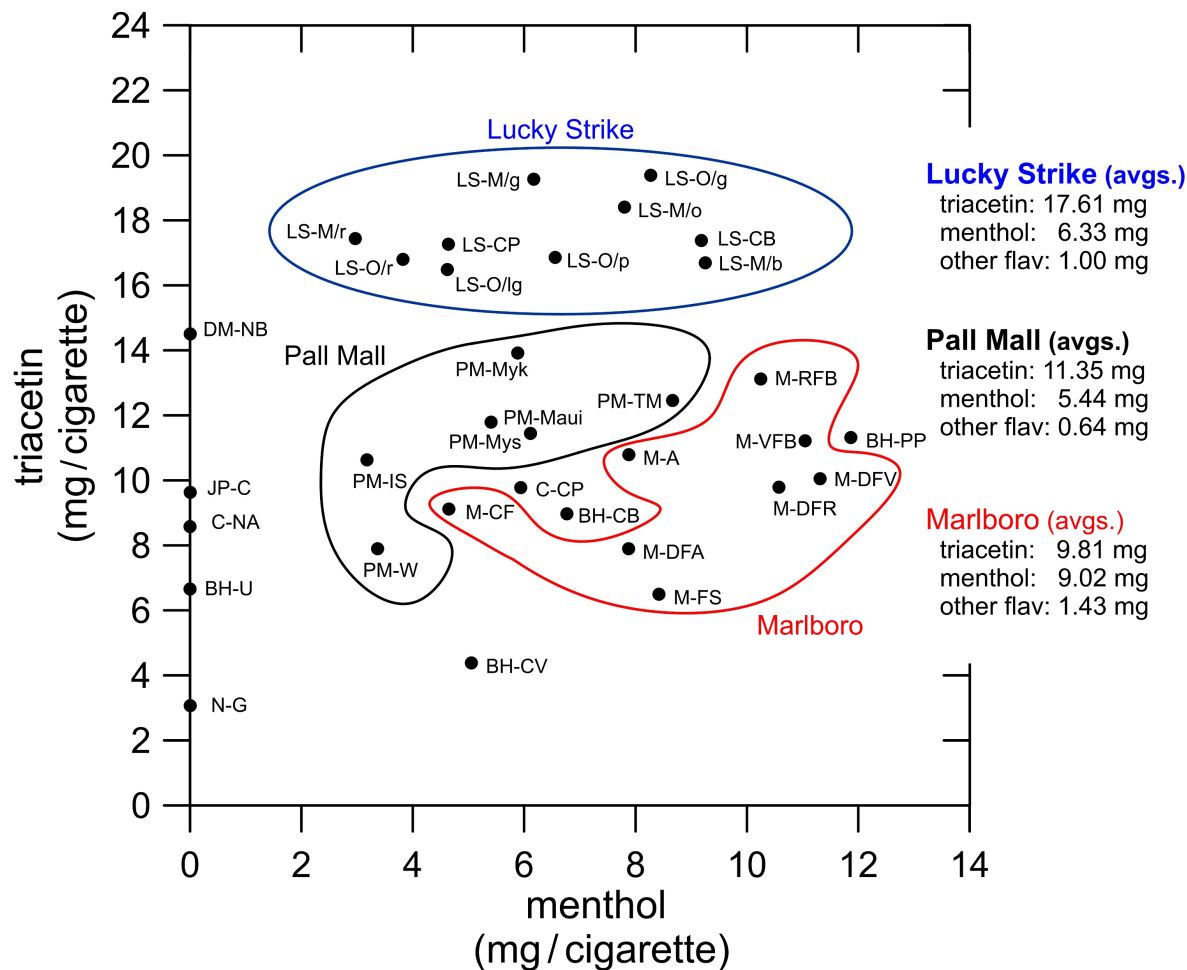

Figure S29. TOFCs (mg/cigarette) vs. menthol (mg/cigarette).

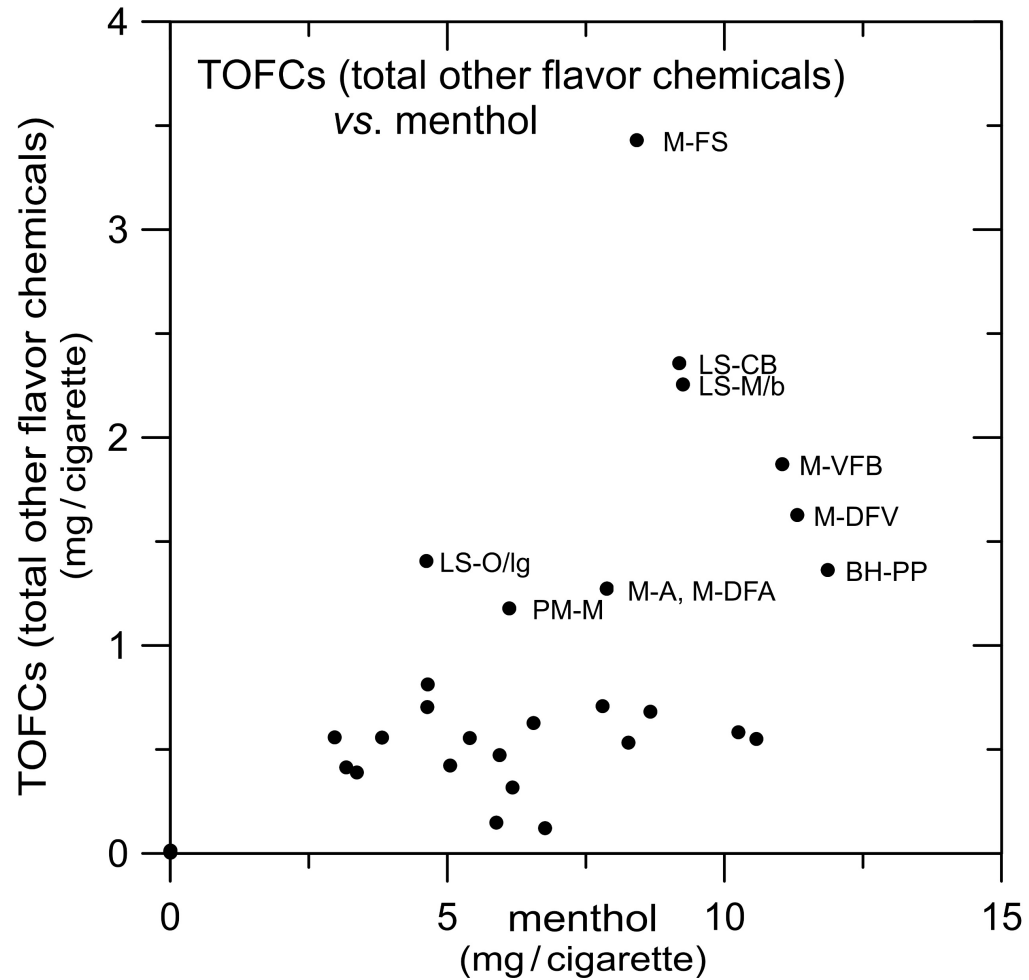

Supplement: tobaccocontrol-2020-056173supp001.pdf [file tobaccocontrol-2020-056173supp001.pdf]
