# Supplementary material for: 'Menthol-Plus’: a major category of cigarette found among ‘concept’ descriptor cigarettes from Mexico
Source: HighWire-hosted journal article supplement (doi:10.1136/tobaccocontrol-2020-056173), 2021-03-09
Supplement: tobaccocontrol-2020-056173supp002_data_supplement.xlsx [file tobaccocontrol-2020-056173supp002_data_supplement.xlsx]

## Sheet: INDEX
	Country of Origin:	Canada
		Mexico
		U.S.
Cigarette Variant	Worksheet Name
Marlboro "Velvet Fusion Blast" (Mexico)	MVFB
John Player "Choice" (Canada)	JPC
Camel "North, Aqua Filter" (Canada)	CNA
Marlboro "Amber" (Mexico)	MA
Marlboro "Capsula Fresca" (Mexico)	MCF
Du Maurier "Nano Blue" (Canada)	DMNB
Lucky Strike "Flow Filter" October pack/green (Mexico)	LSFF_OPG
Next "Green" (Canada)	NG
Benson & Hedges "Unison" (Canada)	BHU
Pall Mall XL "Tokyo Midnight" (Mexico)	PMXL_TM
Marlboro "Ruby Fusion Blast" (Mexico)	MRFB
Pall Mall XL "Mykonos Nightfall" (Mexico)	PMXL_MN
Lucky Strike "Flow Filter" March pack/blue (Mexico)	LSFF_MPB
Lucky Strike "Flow Filter" March pack/orange (Mexico)	LSFF_MPO
Lucky Strike "Flow Filter" March pack/green (Mexico)	LSFF_MPG
Lucky Strike "Flow Filter" March pack/red (Mexico)	LSFF_MPR
Marlboro "Double Fusion Velvet" (Mexico)	MDFV
Pall Mall XL "Black Edition/Ibiza Sunset" (Mexico)	PMXL_BEIS
Benson & Hedges "Crystal Blue" (Canada)	BHCB
Pall Mall "Wave" (Mexico)	PMW
Benson & Hedges "Crystal Violet" (Canada)	BHCV
Benson & Hedges "Polar Pearls" (Canada)	BHPP
Chesterfield "Caps Purple" (Mexico)	CFCP
Marlboro "Double Fusion Ruby" (Mexico)	MDFR
Marlboro "Fusion Shine" (Mexico)	MFS
Marlboro "Double Fusion Amber" (Mexico)	MDFA
Pall Mall XL "Mystery" (Mexico)	PMXL_M
Pall Mall XL "Black Edition/Maui Crepuscule" (Mexico)	PMXL_BEMC
Lucky Strike "Convertibles" purple Mexico)	LSCP
Lucky Strike "Convertibles" blue (Mexico)	LSCB
Lucky Strike "Flow Filter" October pack/purple (Mexico)	LSFF_OPP
Lucky Strike "Flow Filter" October pack/light green (Mexico)	LSFF_OPLG
Lucky Strike "Flow Filter" October pack/red (Mexico)	LSFF_OPR
Camel "Crush" Menthol (U.S.)	CCM
Nat Sherman "Nat's" Menthol (U.S.)	NSNM
Natural American Spirit Menthol (U.S.)	NAPM
Malboro Menthol (U.S.)	MM
Newport (Menthol) (U.S.)	NM

## Sheet: MVFB
Sample data summary				ND	not detected
concentrations are in ug/cig material				NA	not available
Fruit
Mint related				Cigarette	Marlboro Velvet Fusion Blast Tobacco		Marlboro Velvet Fusion Blast Filter
				Replicate #	2		2
					Average	stdev	Average	stdev
				Sample (g/cig)	0.7723	0.0387495	0.257525	0.00420729
#	Flavor List #	Compound Name	CAS Number	Formula
1	2	Ethyl Acetate	141-78-6	C4H8O2	ND	NA	2.94554	0.334232
2	3	Hydroxyacetone	116-09-6	C3H6O2	1.27841	0.227766	1.31338	0.0214572
3	5	Ethyl Propanoate	105-37-3	C5H10O2	ND	NA	ND	NA
4	8	Isopentyl Alcohol	123-51-3	C5H12O	2.0025	0.117691	8.63892	0.0136861
5	11	1-Pentanol	71-41-0	C5H12O	1.97073	0.153421	4.557	0.0712092
6	13	Ethyl butanoate	105-54-4	C6H12O2	1.34741	0.096018	9.09771	0.561453
7	14	Hexanal	66-25-1	C6H12O	ND	NA	ND	NA
8	15	Butyl Acetate	123-86-4	C6H12O2	ND	NA	ND	NA
9	17	Ethyl 2-methylbutanoate	7452-79-1	C7H14O2	ND	NA	ND	NA
10	18	Ethyl Isovalerate	108-64-5	C7H14O2	0.268935	0.0410475	1.44065	0.158537
11	19	Furfural	98-01-1	C5H4O2	0.346165	0.0371726	0.322055	0.0234689
12	20	Isoamyl Acetate	123-92-2	C7H14O2	4.11674	0.393399	25.4452	0.949842
13	21	2-Methylbutyl Acetate	624-41-9	C7H14O2	3.00375	0.176536	18.0708	0.615137
14	22	(3Z)-3-Hexen-1-ol	928-96-1	C6H12O	ND	NA	26.4585	0.159152
15	23	2-Hexen-1-ol, (E)-	928-95-0	C6H12O	ND	NA	ND	NA
15	24	1-Hexanol	111-27-3	C6H14O	ND	NA	1.09344	0.109587
16	25	Furfuryl alcohol	98-00-0	C5H6O2	0.54335	0.136344	0.65654	0.00748119
17	26	Amyl Acetate	628-63-7	C7H14O2	5.30969	0.497167	30.0751	0.017957
18	27	2,5-dimethylpyrazine	123-32-0	C6H8N2	ND	NA	ND	NA
19	28	(3Z)-3-Hexenyl Formate	33467-73-1	C7H12O2	ND	NA	ND	NA
20	29	α-Pinene	80-56-8	C10H16	ND	NA	ND	NA
21	34	β-Myrcene	123-35-3	C10H16	ND	NA	0.360833	0.0423097
22	35	β-Pinene	127-91-3	C10H16	ND	NA	ND	NA
23	36	Butyl butyrate	109-21-7	C8H16O2	ND	NA	0.681995	0.04348
24	37	Ethyl hexanoate	123-66-0	C8H16O2	ND	NA	ND	NA
25	38	Benzaldehyde	100-52-7	C7H6O	0.92402	0.0627204	5.7801	0.0694344
26	42	2,3,5-Trimethylpyrazine	14667-55-1	C7H10N2	ND	NA	0.489297	0.00799384
27	43	Hexyl acetate	142-92-7	C8H16O2	0.657825	0.0875469	131.545	0.783559
28	45	1,4-Cineol	470-67-7	C10H18O	ND	NA	ND	NA
29	46	Limonene	138-86-3	C10H16	1.92527	0.121566	3.47599	0.0160407
30	47	p-Cymene	99-87-6	C10H14	ND	NA	ND	NA
31	49	Eucalyptol	470-82-6	C10H18O	ND	NA	ND	NA
32	50	γ-Terpinene	99-85-4	C10H16	ND	NA	ND	NA
33	51	Dimethyl butanedioate	106-65-0	C6H10O4	0.92402	0.0627204	7.2305	0.610166
34	53	Isoamyl Butyrate	106-27-4	C9H18O2	ND	NA	55.5582	0.561736
35	55	Ally hexanoate	123-68-2	C9H16O2	ND	NA	112.365	1.08925
36	57	Benzyl Alcohol	100-51-6	C7H8O	43.4241	1.46973	111.063	2.41531
37	60	Ethyl Heptanoate	106-30-9	C9H18O2	ND	NA	ND	NA
38	61	cis-Linalool oxide	5989-33-3	C10H18O2	ND	NA	ND	NA
39	62	Furaneol	3658-77-3	C6H8O3	ND	NA	ND	NA
40	63	Isoamyl Isovalerate	659-70-1	C10H20O2	6.67081	0.0470862	13.1749	0.524769
41	64	Amyl Isovalerate	25415-62-7	C10H20O2	ND	NA	ND	NA
42	67	Acetophenone	98-86-2	C8H8O	ND	NA	ND	NA
43	68	Linalool	78-70-6	C10H18O	1.48381	0.728942	319.521	3.29016
44	69	2-Acetylpyrrole	1072-83-9	C6H7NO	0.54061	0.0271246	0.759848	0.0306213
45	74	cis-Limonene oxide	13837-75-7	C10H16O	ND	NA	ND	NA
46	75	Fenchol	1632-73-1	C10H18O	ND	NA	ND	NA
47	76	trans-Limonene oxide	6909-30-4	C10H16O	ND	NA	ND	NA
48	77	Maltol	118-71-8	C6H6O3	ND	NA	ND	NA
49	78	Phenethyl alcohol	60-12-8	C8H10O	0.655085	0.0216728	0.862858	0.0323042
50	79	β-Citronellal	106-23-0	C10H18O	ND	NA	ND	NA
51	80	Isopulegol	89-79-2	C10H18O	2.07973	0.113816	19.4369	0.44716
52	82	Benzyl acetate	140-11-4	C9H10O2	0.46064	0.08597	2.62646	0.00649478
53	83	Ethyl octanoate	106-32-1	C10H20O2	ND	NA	6.81198	0.165912
54	85	p-Menthone	10458-14-7	C10H18O	0.7723	0.0387495	96.6323	2.67116
55	87	Neomenthol	2216-52-6	C10H20O	1.15845	0.0581242	9.73534	0.268294
56	89	4-Terpineol	20126-76-5	C10H18O	ND	NA	ND	NA
57	90	Menthol	15356-70-4	C10H20O	1339.89	32.9214	9705.24	82.2695
58	95	3'-Methylacetophenone	585-74-0	C9H10O	ND	NA	ND	NA
59	96	α-Terpineol	10482-56-1	C10H18O	ND	NA	75.3808	0.0480479
60	98	Methyl salicylate	119-36-8	C8H8O3	ND	NA	0.747715	0.12146
61	99	γ-Heptalactone	105-21-5	C7H12O2	ND	NA	ND	NA
62	100	Linaly acetate	115-95-7	C12H20O2	4.59656	0.285169	6.86051	0.197442
63	101	Ethyl Maltol	4940-11-8	C7H8O3	ND	NA	23.1226	3.14528
64	103	Benzeneacetic acid, ethyl ester	101-97-3	C10H12O2	0.46338	0.0232497	1.78965	0.0110309
65	104	trans-Geraniol	106-24-1	C10H18O	ND	NA	121.972	1.4647
66	106	Pulegone	89-82-7	C10H16O	ND	NA	0.848642	0.131794
67	107	Ethyl nonanoate	123-29-5	C11H22O2	ND	NA	ND	NA
68	108	Carvone	99-49-0	C10H14O	ND	NA	ND	NA
69	109	Menthyl Acetate	16409-45-3	C12H22O2	0.652345	0.130893	2.57346	0.176444
70	110	Benzaldehyde PG acetal	2568-25-4	C10H12O2	2.3514	0.0456437	9.55626	0.411027
71	111	Citral	5392-40-5	C10H16O	ND	NA	ND	NA
72	113	Piperitone	89-81-6	C10H16O	ND	NA	ND	NA
73	114	p-Anisaldehyde	123-11-5	C8H8O2	ND	NA	ND	NA
74	116	Cinnamaldehyde, (E)-	14371-10-9	C9H8O	ND	NA	0.412338	0.0431512
75	117	Thymol	89-83-8	C10H14O	ND	NA	ND	NA
76	120	Nerol acetate	141-12-8	C12H20O2	ND	NA	ND	NA
77	122	Benzyl Butyrate	103-37-7	C11H14O2	ND	NA	0.269955	0.0502117
78	124	Triacetin	102-76-1	C9H14O6	253.305	170.603	10964.7	318.511
79	125	Geraniol Acetate	105-87-3	C12H20O2	ND	NA	ND	NA
80	127	Ethyl decanoate	110-38-3	C12H24O2	0.7723	0.0387495	9.01308	0.110835
81	129	Eugenol	97-53-0	C10H12O2	103.527	3.66723	61.377	5.22684
82	132	Piperonal	120-57-0	C8H6O3	9.37111	0.0206829	8.0117	0.458622
83	134	Methyl cinnamate	103-26-4	C10H10O2	ND	NA	ND	NA
84	138	β-Caryophyllene	87-44-5	C15H24	1.66182	0.137921	1.66089	0.00892722
85	139	γ-Nonalactone	104-61-0	C9H16O2	ND	NA	ND	NA
86	141	β-Damascone	23726-91-2	C13H20O	ND	NA	ND	NA
87	143	α-Ionone	127-41-3	C13H20O	ND	NA	ND	NA
88	144	Ethyl anthranilate	87-25-2	C9H11NO2	1.19295	0.103768	ND	NA
89	148	α-Caryophyllene (α-Humulene)	6753-98-6	C15H24	ND	NA	ND	NA
90	149	Vanillin	121-33-5	C8H8O3	ND	NA	ND	NA
91	150	Ethyl Cinnamate	103-36-6	C11H12O2	ND	NA	ND	NA
92	154	(E)-β-Ionone	79-77-6	C13H20O	ND	NA	34.0069	0.646621
93	155	Ethyl Vanillin	121-32-4	C9H10O3	ND	NA	ND	NA
94	158	γ-Decalactone	706-14-9	C10H18O2	0.586075	0.302111	109.175	0.182766
95	159	Acetyleugenol	93-28-7	C12H14O3	7.32863	0.0404607	3.06633	0.268584
96	160	Raspberry Ketone methyl ether	104-20-1	C11H14O2	ND	NA	ND	NA
97	164	Ethyl Laurate	106-33-2	C14H28O2	ND	NA	2.08655	0.106918
98	165	δ-Decalactone	705-86-2	C10H18O2	0.726835	0.236237	0.642622	0.13516
99	167	δ-Undecalactone	104-67-6	C11H20O2	0.70603	0.471753	111.092	1.26873
100	168	Raspberry ketone	5471-51-2	C10H12O2	ND	NA	ND	NA
101	172	Benzophenone	119-61-9	C13H10O	ND	NA	ND	NA
102	174	δ-Dodecalactone	713-95-1	C12H22O2	ND	NA	44.4272	0.348409
103	178	Caffeine	58-08-2	C8H10N4O2	ND	NA	ND	NA

## Sheet: JPC
Sample data summary				ND	not detected
concentrations are in ug/cig material				NA	not available
Fruit
Mint related				Cigarette	John Player Choice Tobacco		John Player Choice Filter
				Replicate #	2		2
					Average	stdev	Average	stdev
				Sample (g/cig)	0.718925	0.00463155	0.244825	0.00144957
#	Flavor List #	Compound Name	CAS Number	Formula
1	2	Ethyl Acetate	141-78-6	C4H8O2	ND	NA	ND	NA
2	3	Hydroxyacetone	116-09-6	C3H6O2	1.36563	0.0928714	0.954817	0.00565332
3	5	Ethyl Propanoate	105-37-3	C5H10O2	ND	NA	ND	NA
4	8	Isopentyl Alcohol	123-51-3	C5H12O	ND	NA	ND	NA
5	11	1-Pentanol	71-41-0	C5H12O	ND	NA	ND	NA
6	13	Ethyl butanoate	105-54-4	C6H12O2	ND	NA	ND	NA
7	14	Hexanal	66-25-1	C6H12O	ND	NA	ND	NA
8	15	Butyl Acetate	123-86-4	C6H12O2	ND	NA	ND	NA
9	17	Ethyl 2-methylbutanoate	7452-79-1	C7H14O2	ND	NA	ND	NA
10	18	Ethyl Isovalerate	108-64-5	C7H14O2	ND	NA	ND	NA
11	19	Furfural	98-01-1	C5H4O2	ND	NA	0.489445	0.0663478
12	20	Isoamyl Acetate	123-92-2	C7H14O2	ND	NA	ND	NA
13	21	2-Methylbutyl Acetate	624-41-9	C7H14O2	ND	NA	ND	NA
14	22	(3Z)-3-Hexen-1-ol	928-96-1	C6H12O	ND	NA	ND	NA
15	23	2-Hexen-1-ol, (E)-	928-95-0	C6H12O	ND	NA	ND	NA
15	24	1-Hexanol	111-27-3	C6H14O	ND	NA	ND	NA
16	25	Furfuryl alcohol	98-00-0	C5H6O2	0.431355	0.00277893	1.38372	0.163996
17	26	Amyl Acetate	628-63-7	C7H14O2	ND	NA	ND	NA
18	27	2,5-dimethylpyrazine	123-32-0	C6H8N2	ND	NA	0.416305	0.0370878
19	28	(3Z)-3-Hexenyl Formate	33467-73-1	C7H12O2	ND	NA	ND	NA
20	29	α-Pinene	80-56-8	C10H16	ND	NA	ND	NA
21	34	β-Myrcene	123-35-3	C10H16	ND	NA	ND	NA
22	35	β-Pinene	127-91-3	C10H16	ND	NA	ND	NA
23	36	Butyl butyrate	109-21-7	C8H16O2	ND	NA	ND	NA
24	37	Ethyl hexanoate	123-66-0	C8H16O2	ND	NA	ND	NA
25	38	Benzaldehyde	100-52-7	C7H6O	ND	NA	0.354945	0.0152099
26	42	2,3,5-Trimethylpyrazine	14667-55-1	C7H10N2	ND	NA	ND	NA
27	43	Hexyl acetate	142-92-7	C8H16O2	ND	NA	ND	NA
28	45	1,4-Cineol	470-67-7	C10H18O	ND	NA	ND	NA
29	46	Limonene	138-86-3	C10H16	ND	NA	ND	NA
30	47	p-Cymene	99-87-6	C10H14	ND	NA	ND	NA
31	49	Eucalyptol	470-82-6	C10H18O	ND	NA	ND	NA
32	50	γ-Terpinene	99-85-4	C10H16	ND	NA	ND	NA
33	51	Dimethyl butanedioate	106-65-0	C6H10O4	ND	NA	ND	NA
34	53	Isoamyl Butyrate	106-27-4	C9H18O2	ND	NA	ND	NA
35	55	Ally hexanoate	123-68-2	C9H16O2	ND	NA	ND	NA
36	57	Benzyl Alcohol	100-51-6	C7H8O	0.323352	0.0487515	1.89755	0.0631694
37	60	Ethyl Heptanoate	106-30-9	C9H18O2	ND	NA	ND	NA
38	61	cis-Linalool oxide	5989-33-3	C10H18O2	ND	NA	ND	NA
39	62	Furaneol	3658-77-3	C6H8O3	ND	NA	ND	NA
40	63	Isoamyl Isovalerate	659-70-1	C10H20O2	ND	NA	ND	NA
41	64	Amyl Isovalerate	25415-62-7	C10H20O2	ND	NA	ND	NA
42	67	Acetophenone	98-86-2	C8H8O	0.25146	0.0492146	0.367237	0.00217435
43	68	Linalool	78-70-6	C10H18O	ND	NA	ND	NA
44	69	2-Acetylpyrrole	1072-83-9	C6H7NO	0.251787	0.0524567	1.2485	0.0272307
45	74	cis-Limonene oxide	13837-75-7	C10H16O	ND	NA	ND	NA
46	75	Fenchol	1632-73-1	C10H18O	ND	NA	ND	NA
47	76	trans-Limonene oxide	6909-30-4	C10H16O	ND	NA	ND	NA
48	77	Maltol	118-71-8	C6H6O3	ND	NA	ND	NA
49	78	Phenethyl alcohol	60-12-8	C8H10O	ND	NA	0.930335	0.00550836
50	79	β-Citronellal	106-23-0	C10H18O	ND	NA	ND	NA
51	80	Isopulegol	89-79-2	C10H18O	ND	NA	ND	NA
52	82	Benzyl acetate	140-11-4	C9H10O2	ND	NA	ND	NA
53	83	Ethyl octanoate	106-32-1	C10H20O2	ND	NA	ND	NA
54	85	p-Menthone	10458-14-7	C10H18O	ND	NA	ND	NA
55	87	Neomenthol	2216-52-6	C10H20O	ND	NA	ND	NA
56	89	4-Terpineol	20126-76-5	C10H18O	ND	NA	ND	NA
57	90	Menthol	15356-70-4	C10H20O	0.862055	0.197785	0.514132	0.00304409
58	95	3'-Methylacetophenone	585-74-0	C9H10O	ND	NA	ND	NA
59	96	α-Terpineol	10482-56-1	C10H18O	ND	NA	ND	NA
60	98	Methyl salicylate	119-36-8	C8H8O3	ND	NA	ND	NA
61	99	γ-Heptalactone	105-21-5	C7H12O2	ND	NA	ND	NA
62	100	Linaly acetate	115-95-7	C12H20O2	ND	NA	ND	NA
63	101	Ethyl Maltol	4940-11-8	C7H8O3	ND	NA	ND	NA
64	103	Benzeneacetic acid, ethyl ester	101-97-3	C10H12O2	ND	NA	ND	NA
65	104	trans-Geraniol	106-24-1	C10H18O	ND	NA	ND	NA
66	106	Pulegone	89-82-7	C10H16O	ND	NA	ND	NA
67	107	Ethyl nonanoate	123-29-5	C11H22O2	ND	NA	ND	NA
68	108	Carvone	99-49-0	C10H14O	ND	NA	ND	NA
69	109	Menthyl Acetate	16409-45-3	C12H22O2	ND	NA	ND	NA
70	110	Benzaldehyde PG acetal	2568-25-4	C10H12O2	ND	NA	ND	NA
71	111	Citral	5392-40-5	C10H16O	ND	NA	ND	NA
72	113	Piperitone	89-81-6	C10H16O	ND	NA	ND	NA
73	114	p-Anisaldehyde	123-11-5	C8H8O2	ND	NA	ND	NA
74	116	Cinnamaldehyde, (E)-	14371-10-9	C9H8O	ND	NA	ND	NA
75	117	Thymol	89-83-8	C10H14O	ND	NA	ND	NA
76	120	Nerol acetate	141-12-8	C12H20O2	ND	NA	ND	NA
77	122	Benzyl Butyrate	103-37-7	C11H14O2	ND	NA	ND	NA
78	124	Triacetin	102-76-1	C9H14O6	43.7979	5.06061	9584.65	242.068
79	125	Geraniol Acetate	105-87-3	C12H20O2	ND	NA	ND	NA
80	127	Ethyl decanoate	110-38-3	C12H24O2	ND	NA	ND	NA
81	129	Eugenol	97-53-0	C10H12O2	ND	NA	ND	NA
82	132	Piperonal	120-57-0	C8H6O3	ND	NA	ND	NA
83	134	Methyl cinnamate	103-26-4	C10H10O2	ND	NA	ND	NA
84	138	β-Caryophyllene	87-44-5	C15H24	ND	NA	ND	NA
85	139	γ-Nonalactone	104-61-0	C9H16O2	ND	NA	ND	NA
86	141	β-Damascone	23726-91-2	C13H20O	ND	NA	ND	NA
87	143	α-Ionone	127-41-3	C13H20O	ND	NA	ND	NA
88	144	Ethyl anthranilate	87-25-2	C9H11NO2	ND	NA	ND	NA
89	148	α-Caryophyllene (α-Humulene)	6753-98-6	C15H24	ND	NA	ND	NA
90	149	Vanillin	121-33-5	C8H8O3	ND	NA	ND	NA
91	150	Ethyl Cinnamate	103-36-6	C11H12O2	ND	NA	ND	NA
92	154	(E)-β-Ionone	79-77-6	C13H20O	ND	NA	ND	NA
93	155	Ethyl Vanillin	121-32-4	C9H10O3	ND	NA	ND	NA
94	158	γ-Decalactone	706-14-9	C10H18O2	0.28757	0.00185262	0.244825	0.00144957
95	159	Acetyleugenol	93-28-7	C12H14O3	ND	NA	ND	NA
96	160	Raspberry Ketone methyl ether	104-20-1	C11H14O2	ND	NA	ND	NA
97	164	Ethyl Laurate	106-33-2	C14H28O2	ND	NA	ND	NA
98	165	δ-Decalactone	705-86-2	C10H18O2	ND	NA	ND	NA
99	167	δ-Undecalactone	104-67-6	C11H20O2	ND	NA	ND	NA
100	168	Raspberry ketone	5471-51-2	C10H12O2	ND	NA	ND	NA
101	172	Benzophenone	119-61-9	C13H10O	ND	NA	ND	NA
102	174	δ-Dodecalactone	713-95-1	C12H22O2	ND	NA	ND	NA
103	178	Caffeine	58-08-2	C8H10N4O2	ND	NA	ND	NA

## Sheet: CNA
Sample data summary				ND	not detected
concentrations are in ug/cig material				NA	not available
Fruit
Mint related				Cigarette	Camel North Aqua Tobacco		Camel North Aqua Filter
				Replicate #	2		2
					Average	stdev	Average	stdev
				Sample (g/cig)	0.6448	0.017607	0.3965	0.00905097
#	Flavor List #	Compound Name	CAS Number	Formula
1	2	Ethyl Acetate	141-78-6	C4H8O2	ND	NA	ND	NA
2	3	Hydroxyacetone	116-09-6	C3H6O2	ND	NA	ND	NA
3	5	Ethyl Propanoate	105-37-3	C5H10O2	ND	NA	ND	NA
4	8	Isopentyl Alcohol	123-51-3	C5H12O	ND	NA	ND	NA
5	11	1-Pentanol	71-41-0	C5H12O	ND	NA	ND	NA
6	13	Ethyl butanoate	105-54-4	C6H12O2	ND	NA	ND	NA
7	14	Hexanal	66-25-1	C6H12O	ND	NA	ND	NA
8	15	Butyl Acetate	123-86-4	C6H12O2	ND	NA	ND	NA
9	17	Ethyl 2-methylbutanoate	7452-79-1	C7H14O2	ND	NA	ND	NA
10	18	Ethyl Isovalerate	108-64-5	C7H14O2	ND	NA	ND	NA
11	19	Furfural	98-01-1	C5H4O2	ND	NA	ND	NA
12	20	Isoamyl Acetate	123-92-2	C7H14O2	ND	NA	ND	NA
13	21	2-Methylbutyl Acetate	624-41-9	C7H14O2	ND	NA	ND	NA
14	22	(3Z)-3-Hexen-1-ol	928-96-1	C6H12O	ND	NA	ND	NA
15	23	2-Hexen-1-ol, (E)-	928-95-0	C6H12O	ND	NA	ND	NA
15	24	1-Hexanol	111-27-3	C6H14O	ND	NA	ND	NA
16	25	Furfuryl alcohol	98-00-0	C5H6O2	0.3224	0.00880348	0.35685	0.00814587
17	26	Amyl Acetate	628-63-7	C7H14O2	ND	NA	ND	NA
18	27	2,5-dimethylpyrazine	123-32-0	C6H8N2	ND	NA	ND	NA
19	28	(3Z)-3-Hexenyl Formate	33467-73-1	C7H12O2	ND	NA	ND	NA
20	29	α-Pinene	80-56-8	C10H16	ND	NA	ND	NA
21	34	β-Myrcene	123-35-3	C10H16	ND	NA	ND	NA
22	35	β-Pinene	127-91-3	C10H16	ND	NA	ND	NA
23	36	Butyl butyrate	109-21-7	C8H16O2	ND	NA	ND	NA
24	37	Ethyl hexanoate	123-66-0	C8H16O2	ND	NA	ND	NA
25	38	Benzaldehyde	100-52-7	C7H6O	ND	NA	0.27755	0.00633568
26	42	2,3,5-Trimethylpyrazine	14667-55-1	C7H10N2	ND	NA	ND	NA
27	43	Hexyl acetate	142-92-7	C8H16O2	ND	NA	ND	NA
28	45	1,4-Cineol	470-67-7	C10H18O	ND	NA	ND	NA
29	46	Limonene	138-86-3	C10H16	ND	NA	ND	NA
30	47	p-Cymene	99-87-6	C10H14	ND	NA	ND	NA
31	49	Eucalyptol	470-82-6	C10H18O	ND	NA	ND	NA
32	50	γ-Terpinene	99-85-4	C10H16	ND	NA	ND	NA
33	51	Dimethyl butanedioate	106-65-0	C6H10O4	ND	NA	ND	NA
34	53	Isoamyl Butyrate	106-27-4	C9H18O2	ND	NA	ND	NA
35	55	Ally hexanoate	123-68-2	C9H16O2	ND	NA	ND	NA
36	57	Benzyl Alcohol	100-51-6	C7H8O	0.418497	0.0341497	1.62693	0.149256
37	60	Ethyl Heptanoate	106-30-9	C9H18O2	ND	NA	ND	NA
38	61	cis-Linalool oxide	5989-33-3	C10H18O2	ND	NA	ND	NA
39	62	Furaneol	3658-77-3	C6H8O3	ND	NA	ND	NA
40	63	Isoamyl Isovalerate	659-70-1	C10H20O2	ND	NA	ND	NA
41	64	Amyl Isovalerate	25415-62-7	C10H20O2	ND	NA	ND	NA
42	67	Acetophenone	98-86-2	C8H8O	0.225058	0.0394318	0.31592	0.104906
43	68	Linalool	78-70-6	C10H18O	ND	NA	ND	NA
44	69	2-Acetylpyrrole	1072-83-9	C6H7NO	0.225058	0.0394318	0.51673	0.123913
45	74	cis-Limonene oxide	13837-75-7	C10H16O	ND	NA	ND	NA
46	75	Fenchol	1632-73-1	C10H18O	ND	NA	ND	NA
47	76	trans-Limonene oxide	6909-30-4	C10H16O	ND	NA	ND	NA
48	77	Maltol	118-71-8	C6H6O3	ND	NA	ND	NA
49	78	Phenethyl alcohol	60-12-8	C8H10O	0.160578	0.0411925	0.614895	0.0420658
50	79	β-Citronellal	106-23-0	C10H18O	ND	NA	ND	NA
51	80	Isopulegol	89-79-2	C10H18O	ND	NA	ND	NA
52	82	Benzyl acetate	140-11-4	C9H10O2	ND	NA	ND	NA
53	83	Ethyl octanoate	106-32-1	C10H20O2	ND	NA	ND	NA
54	85	p-Menthone	10458-14-7	C10H18O	ND	NA	ND	NA
55	87	Neomenthol	2216-52-6	C10H20O	ND	NA	ND	NA
56	89	4-Terpineol	20126-76-5	C10H18O	ND	NA	ND	NA
57	90	Menthol	15356-70-4	C10H20O	ND	NA	ND	NA
58	95	3'-Methylacetophenone	585-74-0	C9H10O	ND	NA	ND	NA
59	96	α-Terpineol	10482-56-1	C10H18O	ND	NA	ND	NA
60	98	Methyl salicylate	119-36-8	C8H8O3	ND	NA	ND	NA
61	99	γ-Heptalactone	105-21-5	C7H12O2	ND	NA	ND	NA
62	100	Linaly acetate	115-95-7	C12H20O2	ND	NA	ND	NA
63	101	Ethyl Maltol	4940-11-8	C7H8O3	ND	NA	ND	NA
64	103	Benzeneacetic acid, ethyl ester	101-97-3	C10H12O2	ND	NA	ND	NA
65	104	trans-Geraniol	106-24-1	C10H18O	ND	NA	ND	NA
66	106	Pulegone	89-82-7	C10H16O	ND	NA	ND	NA
67	107	Ethyl nonanoate	123-29-5	C11H22O2	ND	NA	ND	NA
68	108	Carvone	99-49-0	C10H14O	ND	NA	ND	NA
69	109	Menthyl Acetate	16409-45-3	C12H22O2	ND	NA	ND	NA
70	110	Benzaldehyde PG acetal	2568-25-4	C10H12O2	ND	NA	ND	NA
71	111	Citral	5392-40-5	C10H16O	ND	NA	ND	NA
72	113	Piperitone	89-81-6	C10H16O	ND	NA	ND	NA
73	114	p-Anisaldehyde	123-11-5	C8H8O2	ND	NA	ND	NA
74	116	Cinnamaldehyde, (E)-	14371-10-9	C9H8O	ND	NA	ND	NA
75	117	Thymol	89-83-8	C10H14O	ND	NA	ND	NA
76	120	Nerol acetate	141-12-8	C12H20O2	ND	NA	ND	NA
77	122	Benzyl Butyrate	103-37-7	C11H14O2	ND	NA	ND	NA
78	124	Triacetin	102-76-1	C9H14O6	46.918	4.28925	8532.59	455.869
79	125	Geraniol Acetate	105-87-3	C12H20O2	ND	NA	ND	NA
80	127	Ethyl decanoate	110-38-3	C12H24O2	ND	NA	ND	NA
81	129	Eugenol	97-53-0	C10H12O2	ND	NA	ND	NA
82	132	Piperonal	120-57-0	C8H6O3	ND	NA	ND	NA
83	134	Methyl cinnamate	103-26-4	C10H10O2	ND	NA	ND	NA
84	138	β-Caryophyllene	87-44-5	C15H24	ND	NA	ND	NA
85	139	γ-Nonalactone	104-61-0	C9H16O2	ND	NA	ND	NA
86	141	β-Damascone	23726-91-2	C13H20O	ND	NA	ND	NA
87	143	α-Ionone	127-41-3	C13H20O	ND	NA	ND	NA
88	144	Ethyl anthranilate	87-25-2	C9H11NO2	ND	NA	ND	NA
89	148	α-Caryophyllene (α-Humulene)	6753-98-6	C15H24	ND	NA	ND	NA
90	149	Vanillin	121-33-5	C8H8O3	ND	NA	ND	NA
91	150	Ethyl Cinnamate	103-36-6	C11H12O2	ND	NA	ND	NA
92	154	(E)-β-Ionone	79-77-6	C13H20O	ND	NA	ND	NA
93	155	Ethyl Vanillin	121-32-4	C9H10O3	ND	NA	ND	NA
94	158	γ-Decalactone	706-14-9	C10H18O2	ND	NA	ND	NA
95	159	Acetyleugenol	93-28-7	C12H14O3	ND	NA	ND	NA
96	160	Raspberry Ketone methyl ether	104-20-1	C11H14O2	ND	NA	ND	NA
97	164	Ethyl Laurate	106-33-2	C14H28O2	ND	NA	ND	NA
98	165	δ-Decalactone	705-86-2	C10H18O2	ND	NA	ND	NA
99	167	δ-Undecalactone	104-67-6	C11H20O2	ND	NA	ND	NA
100	168	Raspberry ketone	5471-51-2	C10H12O2	ND	NA	ND	NA
101	172	Benzophenone	119-61-9	C13H10O	ND	NA	ND	NA
102	174	δ-Dodecalactone	713-95-1	C12H22O2	ND	NA	ND	NA
103	178	Caffeine	58-08-2	C8H10N4O2	ND	NA	ND	NA

## Sheet: MA
Sample data summary				ND	not detected
concentrations are in ug/cig material				NA	not available
Fruit
Mint related				Cigarette	Marlboro Amber Tobacco		Marlboro Amber Filter
				Replicate #	2		2
					Average	stdev	Average	stdev
				Sample (g/cig)	0.745425	0.0225921	0.254875	0.00116673
#	Flavor List #	Compound Name	CAS Number	Formula
1	2	Ethyl Acetate	141-78-6	C4H8O2	ND	NA	ND	NA
2	3	Hydroxyacetone	116-09-6	C3H6O2	0.59634	0.0180736	1.5295	0.115135
3	5	Ethyl Propanoate	105-37-3	C5H10O2	ND	NA	6.51127	0.312615
4	8	Isopentyl Alcohol	123-51-3	C5H12O	ND	NA	9.11067	0.444894
5	11	1-Pentanol	71-41-0	C5H12O	ND	NA	ND	NA
6	13	Ethyl butanoate	105-54-4	C6H12O2	0.2601	0.0448023	221.66	12.3578
7	14	Hexanal	66-25-1	C6H12O	ND	NA	ND	NA
8	15	Butyl Acetate	123-86-4	C6H12O2	ND	NA	ND	NA
9	17	Ethyl 2-methylbutanoate	7452-79-1	C7H14O2	ND	NA	ND	NA
10	18	Ethyl Isovalerate	108-64-5	C7H14O2	ND	NA	43.5052	0.665914
11	19	Furfural	98-01-1	C5H4O2	ND	NA	0.344205	0.0556422
12	20	Isoamyl Acetate	123-92-2	C7H14O2	0.447255	0.0135552	417.457	5.02758
13	21	2-Methylbutyl Acetate	624-41-9	C7H14O2	0.149085	0.00451841	77.5613	3.95226
14	22	(3Z)-3-Hexen-1-ol	928-96-1	C6H12O	ND	NA	ND	NA
15	23	2-Hexen-1-ol, (E)-	928-95-0	C6H12O	ND	NA	ND	NA
15	24	1-Hexanol	111-27-3	C6H14O	ND	NA	ND	NA
16	25	Furfuryl alcohol	98-00-0	C5H6O2	0.372713	0.011296	0.853955	0.0579757
17	26	Amyl Acetate	628-63-7	C7H14O2	ND	NA	0.560972	0.110701
18	27	2,5-dimethylpyrazine	123-32-0	C6H8N2	ND	NA	0.318635	0.0194808
19	28	(3Z)-3-Hexenyl Formate	33467-73-1	C7H12O2	ND	NA	ND	NA
20	29	α-Pinene	80-56-8	C10H16	ND	NA	ND	NA
21	34	β-Myrcene	123-35-3	C10H16	ND	NA	0.58613	0.0333613
22	35	β-Pinene	127-91-3	C10H16	ND	NA	ND	NA
23	36	Butyl butyrate	109-21-7	C8H16O2	ND	NA	2.638	0.030098
24	37	Ethyl hexanoate	123-66-0	C8H16O2	ND	NA	ND	NA
25	38	Benzaldehyde	100-52-7	C7H6O	ND	NA	9.12271	0.751216
26	42	2,3,5-Trimethylpyrazine	14667-55-1	C7H10N2	ND	NA	0.34404	0.0164473
27	43	Hexyl acetate	142-92-7	C8H16O2	ND	NA	ND	NA
28	45	1,4-Cineol	470-67-7	C10H18O	ND	NA	ND	NA
29	46	Limonene	138-86-3	C10H16	0.448852	0.118974	26.7481	0.328112
30	47	p-Cymene	99-87-6	C10H14	ND	NA	0.395097	0.0198308
31	49	Eucalyptol	470-82-6	C10H18O	ND	NA	ND	NA
32	50	γ-Terpinene	99-85-4	C10H16	ND	NA	ND	NA
33	51	Dimethyl butanedioate	106-65-0	C6H10O4	ND	NA	1.31265	0.024031
34	53	Isoamyl Butyrate	106-27-4	C9H18O2	ND	NA	21.4733	0.152364
35	55	Ally hexanoate	123-68-2	C9H16O2	ND	NA	ND	NA
36	57	Benzyl Alcohol	100-51-6	C7H8O	0.708953	0.074172	123.372	5.16631
37	60	Ethyl Heptanoate	106-30-9	C9H18O2	ND	NA	ND	NA
38	61	cis-Linalool oxide	5989-33-3	C10H18O2	ND	NA	ND	NA
39	62	Furaneol	3658-77-3	C6H8O3	ND	NA	ND	NA
40	63	Isoamyl Isovalerate	659-70-1	C10H20O2	ND	NA	41.4412	0.459096
41	64	Amyl Isovalerate	25415-62-7	C10H20O2	ND	NA	8.58937	0.0753634
42	67	Acetophenone	98-86-2	C8H8O	0.261698	0.0606167	0.22947	0.0370948
43	68	Linalool	78-70-6	C10H18O	ND	NA	1.47786	0.173457
44	69	2-Acetylpyrrole	1072-83-9	C6H7NO	0.372713	0.011296	1.07056	0.040945
45	74	cis-Limonene oxide	13837-75-7	C10H16O	ND	NA	ND	NA
46	75	Fenchol	1632-73-1	C10H18O	ND	NA	ND	NA
47	76	trans-Limonene oxide	6909-30-4	C10H16O	ND	NA	ND	NA
48	77	Maltol	118-71-8	C6H6O3	ND	NA	3.89885	0.306552
49	78	Phenethyl alcohol	60-12-8	C8H10O	0.33624	0.0628759	1.21078	0.0596091
50	79	β-Citronellal	106-23-0	C10H18O	ND	NA	ND	NA
51	80	Isopulegol	89-79-2	C10H18O	ND	NA	12.0396	1.36864
52	82	Benzyl acetate	140-11-4	C9H10O2	ND	NA	1.07048	0.00490025
53	83	Ethyl octanoate	106-32-1	C10H20O2	ND	NA	ND	NA
54	85	p-Menthone	10458-14-7	C10H18O	0.447255	0.0135552	131.056	27.3525
55	87	Neomenthol	2216-52-6	C10H20O	ND	NA	3.93827	0.216272
56	89	4-Terpineol	20126-76-5	C10H18O	ND	NA	ND	NA
57	90	Menthol	15356-70-4	C10H20O	12.3344	0.21577	7866.6	97.2637
58	95	3'-Methylacetophenone	585-74-0	C9H10O	ND	NA	ND	NA
59	96	α-Terpineol	10482-56-1	C10H18O	ND	NA	ND	NA
60	98	Methyl salicylate	119-36-8	C8H8O3	ND	NA	0.815517	0.0323112
61	99	γ-Heptalactone	105-21-5	C7H12O2	ND	NA	ND	NA
62	100	Linaly acetate	115-95-7	C12H20O2	ND	NA	16.6428	0.140081
63	101	Ethyl Maltol	4940-11-8	C7H8O3	ND	NA	4.76591	0.0863165
64	103	Benzeneacetic acid, ethyl ester	101-97-3	C10H12O2	ND	NA	ND	NA
65	104	trans-Geraniol	106-24-1	C10H18O	ND	NA	ND	NA
66	106	Pulegone	89-82-7	C10H16O	ND	NA	ND	NA
67	107	Ethyl nonanoate	123-29-5	C11H22O2	ND	NA	ND	NA
68	108	Carvone	99-49-0	C10H14O	ND	NA	ND	NA
69	109	Menthyl Acetate	16409-45-3	C12H22O2	ND	NA	2.0517	0.00863024
70	110	Benzaldehyde PG acetal	2568-25-4	C10H12O2	ND	NA	ND	NA
71	111	Citral	5392-40-5	C10H16O	ND	NA	ND	NA
72	113	Piperitone	89-81-6	C10H16O	ND	NA	ND	NA
73	114	p-Anisaldehyde	123-11-5	C8H8O2	ND	NA	ND	NA
74	116	Cinnamaldehyde, (E)-	14371-10-9	C9H8O	ND	NA	6.88171	0.0675464
75	117	Thymol	89-83-8	C10H14O	ND	NA	ND	NA
76	120	Nerol acetate	141-12-8	C12H20O2	ND	NA	ND	NA
77	122	Benzyl Butyrate	103-37-7	C11H14O2	ND	NA	ND	NA
78	124	Triacetin	102-76-1	C9H14O6	46.2209	0.759252	10740.2	648.294
79	125	Geraniol Acetate	105-87-3	C12H20O2	ND	NA	ND	NA
80	127	Ethyl decanoate	110-38-3	C12H24O2	ND	NA	6.57379	0.834973
81	129	Eugenol	97-53-0	C10H12O2	ND	NA	ND	NA
82	132	Piperonal	120-57-0	C8H6O3	ND	NA	22.8089	0.940876
83	134	Methyl cinnamate	103-26-4	C10H10O2	ND	NA	ND	NA
84	138	β-Caryophyllene	87-44-5	C15H24	ND	NA	2.24298	0.046312
85	139	γ-Nonalactone	104-61-0	C9H16O2	ND	NA	ND	NA
86	141	β-Damascone	23726-91-2	C13H20O	ND	NA	ND	NA
87	143	α-Ionone	127-41-3	C13H20O	ND	NA	ND	NA
88	144	Ethyl anthranilate	87-25-2	C9H11NO2	ND	NA	ND	NA
89	148	α-Caryophyllene (α-Humulene)	6753-98-6	C15H24	ND	NA	ND	NA
90	149	Vanillin	121-33-5	C8H8O3	ND	NA	3.46622	0.0201773
91	150	Ethyl Cinnamate	103-36-6	C11H12O2	ND	NA	ND	NA
92	154	(E)-β-Ionone	79-77-6	C13H20O	ND	NA	ND	NA
93	155	Ethyl Vanillin	121-32-4	C9H10O3	ND	NA	ND	NA
94	158	γ-Decalactone	706-14-9	C10H18O2	ND	NA	ND	NA
95	159	Acetyleugenol	93-28-7	C12H14O3	ND	NA	30.3055	0.499171
96	160	Raspberry Ketone methyl ether	104-20-1	C11H14O2	ND	NA	ND	NA
97	164	Ethyl Laurate	106-33-2	C14H28O2	ND	NA	1.5926	0.154909
98	165	δ-Decalactone	705-86-2	C10H18O2	ND	NA	ND	NA
99	167	δ-Undecalactone	104-67-6	C11H20O2	ND	NA	ND	NA
100	168	Raspberry ketone	5471-51-2	C10H12O2	ND	NA	ND	NA
101	172	Benzophenone	119-61-9	C13H10O	ND	NA	ND	NA
102	174	δ-Dodecalactone	713-95-1	C12H22O2	ND	NA	ND	NA
103	178	Caffeine	58-08-2	C8H10N4O2	ND	NA	ND	NA

## Sheet: MCF
Sample data summary				ND	not detected
concentrations are in ug/cig material				NA	not available
Fruit
Mint related				Cigarette	Marlboro Capsula Fresca Tobacco		Marlboro Capsula Fresca Filter
				Replicate #	2		2
					Average	stdev	Average	stdev
				Sample (g/cig)	0.7372	0.0136472	0.2042	0.000848528
#	Flavor List #	Compound Name	CAS Number	Formula
1	2	Ethyl Acetate	141-78-6	C4H8O2	ND	NA	ND	NA
2	3	Hydroxyacetone	116-09-6	C3H6O2	1.51174	0.0801046	1.17412	0.00956008
3	5	Ethyl Propanoate	105-37-3	C5H10O2	ND	NA	ND	NA
4	8	Isopentyl Alcohol	123-51-3	C5H12O	ND	NA	ND	NA
5	11	1-Pentanol	71-41-0	C5H12O	ND	NA	ND	NA
6	13	Ethyl butanoate	105-54-4	C6H12O2	ND	NA	ND	NA
7	14	Hexanal	66-25-1	C6H12O	ND	NA	ND	NA
8	15	Butyl Acetate	123-86-4	C6H12O2	ND	NA	ND	NA
9	17	Ethyl 2-methylbutanoate	7452-79-1	C7H14O2	ND	NA	ND	NA
10	18	Ethyl Isovalerate	108-64-5	C7H14O2	ND	NA	ND	NA
11	19	Furfural	98-01-1	C5H4O2	0.257537	0.0473514	0.26552	0.0299813
12	20	Isoamyl Acetate	123-92-2	C7H14O2	ND	NA	ND	NA
13	21	2-Methylbutyl Acetate	624-41-9	C7H14O2	ND	NA	ND	NA
14	22	(3Z)-3-Hexen-1-ol	928-96-1	C6H12O	ND	NA	ND	NA
15	23	2-Hexen-1-ol, (E)-	928-95-0	C6H12O	ND	NA	ND	NA
15	24	1-Hexanol	111-27-3	C6H14O	ND	NA	ND	NA
16	25	Furfuryl alcohol	98-00-0	C5H6O2	0.553382	0.0623633	0.61266	0.0314238
17	26	Amyl Acetate	628-63-7	C7H14O2	ND	NA	ND	NA
18	27	2,5-dimethylpyrazine	123-32-0	C6H8N2	ND	NA	0.36768	0.0592838
19	28	(3Z)-3-Hexenyl Formate	33467-73-1	C7H12O2	ND	NA	ND	NA
20	29	α-Pinene	80-56-8	C10H16	ND	NA	6.299	0.248166
21	34	β-Myrcene	123-35-3	C10H16	ND	NA	ND	NA
22	35	β-Pinene	127-91-3	C10H16	ND	NA	8.06518	0.313022
23	36	Butyl butyrate	109-21-7	C8H16O2	ND	NA	ND	NA
24	37	Ethyl hexanoate	123-66-0	C8H16O2	ND	NA	ND	NA
25	38	Benzaldehyde	100-52-7	C7H6O	ND	NA	0.28588	0.00118794
26	42	2,3,5-Trimethylpyrazine	14667-55-1	C7H10N2	ND	NA	ND	NA
27	43	Hexyl acetate	142-92-7	C8H16O2	ND	NA	ND	NA
28	45	1,4-Cineol	470-67-7	C10H18O	ND	NA	ND	NA
29	46	Limonene	138-86-3	C10H16	ND	NA	16.1509	0.568203
30	47	p-Cymene	99-87-6	C10H14	ND	NA	1.67432	0.0507986
31	49	Eucalyptol	470-82-6	C10H18O	ND	NA	39.6738	0.932504
32	50	γ-Terpinene	99-85-4	C10H16	ND	NA	1.74594	0.021694
33	51	Dimethyl butanedioate	106-65-0	C6H10O4	ND	NA	0.2451	0.0298965
34	53	Isoamyl Butyrate	106-27-4	C9H18O2	ND	NA	ND	NA
35	55	Ally hexanoate	123-68-2	C9H16O2	ND	NA	ND	NA
36	57	Benzyl Alcohol	100-51-6	C7H8O	0.811885	0.119268	2.16476	0.124507
37	60	Ethyl Heptanoate	106-30-9	C9H18O2	ND	NA	ND	NA
38	61	cis-Linalool oxide	5989-33-3	C10H18O2	ND	NA	ND	NA
39	62	Furaneol	3658-77-3	C6H8O3	ND	NA	ND	NA
40	63	Isoamyl Isovalerate	659-70-1	C10H20O2	ND	NA	0.29606	0.0132088
41	64	Amyl Isovalerate	25415-62-7	C10H20O2	ND	NA	0.21444	0.0153301
42	67	Acetophenone	98-86-2	C8H8O	ND	NA	ND	NA
43	68	Linalool	78-70-6	C10H18O	ND	NA	1.08214	0.0532593
44	69	2-Acetylpyrrole	1072-83-9	C6H7NO	0.3686	0.00682358	0.44942	0.0885015
45	74	cis-Limonene oxide	13837-75-7	C10H16O	ND	NA	ND	NA
46	75	Fenchol	1632-73-1	C10H18O	ND	NA	ND	NA
47	76	trans-Limonene oxide	6909-30-4	C10H16O	ND	NA	ND	NA
48	77	Maltol	118-71-8	C6H6O3	ND	NA	ND	NA
49	78	Phenethyl alcohol	60-12-8	C8H10O	0.553382	0.0623633	0.93968	0.177173
50	79	β-Citronellal	106-23-0	C10H18O	ND	NA	ND	NA
51	80	Isopulegol	89-79-2	C10H18O	ND	NA	14.5201	0.753408
52	82	Benzyl acetate	140-11-4	C9H10O2	ND	NA	ND	NA
53	83	Ethyl octanoate	106-32-1	C10H20O2	ND	NA	ND	NA
54	85	p-Menthone	10458-14-7	C10H18O	ND	NA	574.883	7.89171
55	87	Neomenthol	2216-52-6	C10H20O	ND	NA	26.994	0.465389
56	89	4-Terpineol	20126-76-5	C10H18O	ND	NA	34.0701	0.161645
57	90	Menthol	15356-70-4	C10H20O	1.58546	0.0814693	4643.49	40.482
58	95	3'-Methylacetophenone	585-74-0	C9H10O	ND	NA	ND	NA
59	96	α-Terpineol	10482-56-1	C10H18O	ND	NA	4.0943	0.0603304
60	98	Methyl salicylate	119-36-8	C8H8O3	ND	NA	ND	NA
61	99	γ-Heptalactone	105-21-5	C7H12O2	ND	NA	ND	NA
62	100	Linaly acetate	115-95-7	C12H20O2	ND	NA	ND	NA
63	101	Ethyl Maltol	4940-11-8	C7H8O3	ND	NA	ND	NA
64	103	Benzeneacetic acid, ethyl ester	101-97-3	C10H12O2	ND	NA	ND	NA
65	104	trans-Geraniol	106-24-1	C10H18O	ND	NA	ND	NA
66	106	Pulegone	89-82-7	C10H16O	ND	NA	8.26998	0.0233911
67	107	Ethyl nonanoate	123-29-5	C11H22O2	ND	NA	ND	NA
68	108	Carvone	99-49-0	C10H14O	ND	NA	ND	NA
69	109	Menthyl Acetate	16409-45-3	C12H22O2	ND	NA	42.5852	0.184017
70	110	Benzaldehyde PG acetal	2568-25-4	C10H12O2	ND	NA	ND	NA
71	111	Citral	5392-40-5	C10H16O	ND	NA	ND	NA
72	113	Piperitone	89-81-6	C10H16O	ND	NA	3.82854	0.0851639
73	114	p-Anisaldehyde	123-11-5	C8H8O2	ND	NA	ND	NA
74	116	Cinnamaldehyde, (E)-	14371-10-9	C9H8O	ND	NA	ND	NA
75	117	Thymol	89-83-8	C10H14O	ND	NA	0.23486	0.0154149
76	120	Nerol acetate	141-12-8	C12H20O2	ND	NA	ND	NA
77	122	Benzyl Butyrate	103-37-7	C11H14O2	ND	NA	ND	NA
78	124	Triacetin	102-76-1	C9H14O6	81.3033	15.4857	9039.83	502.455
79	125	Geraniol Acetate	105-87-3	C12H20O2	ND	NA	ND	NA
80	127	Ethyl decanoate	110-38-3	C12H24O2	ND	NA	ND	NA
81	129	Eugenol	97-53-0	C10H12O2	ND	NA	ND	NA
82	132	Piperonal	120-57-0	C8H6O3	ND	NA	ND	NA
83	134	Methyl cinnamate	103-26-4	C10H10O2	ND	NA	ND	NA
84	138	β-Caryophyllene	87-44-5	C15H24	ND	NA	16.4988	0.220221
85	139	γ-Nonalactone	104-61-0	C9H16O2	ND	NA	ND	NA
86	141	β-Damascone	23726-91-2	C13H20O	ND	NA	ND	NA
87	143	α-Ionone	127-41-3	C13H20O	ND	NA	ND	NA
88	144	Ethyl anthranilate	87-25-2	C9H11NO2	ND	NA	ND	NA
89	148	α-Caryophyllene (α-Humulene)	6753-98-6	C15H24	ND	NA	0.89836	0.054023
90	149	Vanillin	121-33-5	C8H8O3	ND	NA	ND	NA
91	150	Ethyl Cinnamate	103-36-6	C11H12O2	ND	NA	ND	NA
92	154	(E)-β-Ionone	79-77-6	C13H20O	ND	NA	ND	NA
93	155	Ethyl Vanillin	121-32-4	C9H10O3	ND	NA	ND	NA
94	158	γ-Decalactone	706-14-9	C10H18O2	ND	NA	ND	NA
95	159	Acetyleugenol	93-28-7	C12H14O3	ND	NA	ND	NA
96	160	Raspberry Ketone methyl ether	104-20-1	C11H14O2	ND	NA	ND	NA
97	164	Ethyl Laurate	106-33-2	C14H28O2	ND	NA	ND	NA
98	165	δ-Decalactone	705-86-2	C10H18O2	ND	NA	ND	NA
99	167	δ-Undecalactone	104-67-6	C11H20O2	ND	NA	ND	NA
100	168	Raspberry ketone	5471-51-2	C10H12O2	ND	NA	ND	NA
101	172	Benzophenone	119-61-9	C13H10O	ND	NA	ND	NA
102	174	δ-Dodecalactone	713-95-1	C12H22O2	ND	NA	ND	NA
103	178	Caffeine	58-08-2	C8H10N4O2	ND	NA	ND	NA

## Sheet: DMNB
Sample data summary				ND	not detected
concentrations are in ug/cig material				NA	not available
Fruit
Mint related				Cigarette	Du Maurier Nano Blue Tobacco		Du Maurier Nano Blue Filter
				Replicate #	2		2
					Average	stdev	Average	stdev
				Sample (g/cig)	0.5288	0.0201525	0.234025	0.00335876
#	Flavor List #	Compound Name	CAS Number	Formula
1	2	Ethyl Acetate	141-78-6	C4H8O2	ND	NA	1.29872	0.00209304
2	3	Hydroxyacetone	116-09-6	C3H6O2	0.74032	0.0282136	ND	NA
3	5	Ethyl Propanoate	105-37-3	C5H10O2	ND	NA	ND	NA
4	8	Isopentyl Alcohol	123-51-3	C5H12O	ND	NA	ND	NA
5	11	1-Pentanol	71-41-0	C5H12O	ND	NA	ND	NA
6	13	Ethyl butanoate	105-54-4	C6H12O2	ND	NA	ND	NA
7	14	Hexanal	66-25-1	C6H12O	ND	NA	ND	NA
8	15	Butyl Acetate	123-86-4	C6H12O2	ND	NA	ND	NA
9	17	Ethyl 2-methylbutanoate	7452-79-1	C7H14O2	ND	NA	ND	NA
10	18	Ethyl Isovalerate	108-64-5	C7H14O2	ND	NA	ND	NA
11	19	Furfural	98-01-1	C5H4O2	ND	NA	ND	NA
12	20	Isoamyl Acetate	123-92-2	C7H14O2	ND	NA	ND	NA
13	21	2-Methylbutyl Acetate	624-41-9	C7H14O2	ND	NA	ND	NA
14	22	(3Z)-3-Hexen-1-ol	928-96-1	C6H12O	ND	NA	ND	NA
15	23	2-Hexen-1-ol, (E)-	928-95-0	C6H12O	ND	NA	ND	NA
15	24	1-Hexanol	111-27-3	C6H14O	ND	NA	ND	NA
16	25	Furfuryl alcohol	98-00-0	C5H6O2	ND	NA	ND	NA
17	26	Amyl Acetate	628-63-7	C7H14O2	ND	NA	ND	NA
18	27	2,5-dimethylpyrazine	123-32-0	C6H8N2	ND	NA	ND	NA
19	28	(3Z)-3-Hexenyl Formate	33467-73-1	C7H12O2	ND	NA	ND	NA
20	29	α-Pinene	80-56-8	C10H16	ND	NA	ND	NA
21	34	β-Myrcene	123-35-3	C10H16	ND	NA	ND	NA
22	35	β-Pinene	127-91-3	C10H16	ND	NA	ND	NA
23	36	Butyl butyrate	109-21-7	C8H16O2	ND	NA	ND	NA
24	37	Ethyl hexanoate	123-66-0	C8H16O2	ND	NA	ND	NA
25	38	Benzaldehyde	100-52-7	C7H6O	ND	NA	0.175638	0.0190671
26	42	2,3,5-Trimethylpyrazine	14667-55-1	C7H10N2	ND	NA	ND	NA
27	43	Hexyl acetate	142-92-7	C8H16O2	ND	NA	ND	NA
28	45	1,4-Cineol	470-67-7	C10H18O	ND	NA	ND	NA
29	46	Limonene	138-86-3	C10H16	ND	NA	ND	NA
30	47	p-Cymene	99-87-6	C10H14	ND	NA	ND	NA
31	49	Eucalyptol	470-82-6	C10H18O	ND	NA	ND	NA
32	50	γ-Terpinene	99-85-4	C10H16	ND	NA	ND	NA
33	51	Dimethyl butanedioate	106-65-0	C6H10O4	ND	NA	ND	NA
34	53	Isoamyl Butyrate	106-27-4	C9H18O2	ND	NA	ND	NA
35	55	Ally hexanoate	123-68-2	C9H16O2	ND	NA	ND	NA
36	57	Benzyl Alcohol	100-51-6	C7H8O	0.291552	0.0484757	0.468287	0.0398136
37	60	Ethyl Heptanoate	106-30-9	C9H18O2	ND	NA	ND	NA
38	61	cis-Linalool oxide	5989-33-3	C10H18O2	ND	NA	ND	NA
39	62	Furaneol	3658-77-3	C6H8O3	ND	NA	ND	NA
40	63	Isoamyl Isovalerate	659-70-1	C10H20O2	ND	NA	ND	NA
41	64	Amyl Isovalerate	25415-62-7	C10H20O2	ND	NA	ND	NA
42	67	Acetophenone	98-86-2	C8H8O	ND	NA	0.1754	0.014029
43	68	Linalool	78-70-6	C10H18O	ND	NA	ND	NA
44	69	2-Acetylpyrrole	1072-83-9	C6H7NO	0.2644	0.0100763	0.234262	0.0364549
45	74	cis-Limonene oxide	13837-75-7	C10H16O	ND	NA	ND	NA
46	75	Fenchol	1632-73-1	C10H18O	ND	NA	ND	NA
47	76	trans-Limonene oxide	6909-30-4	C10H16O	ND	NA	ND	NA
48	77	Maltol	118-71-8	C6H6O3	ND	NA	ND	NA
49	78	Phenethyl alcohol	60-12-8	C8H10O	0.184368	0.0303384	0.31629	0.0541785
50	79	β-Citronellal	106-23-0	C10H18O	ND	NA	ND	NA
51	80	Isopulegol	89-79-2	C10H18O	ND	NA	ND	NA
52	82	Benzyl acetate	140-11-4	C9H10O2	ND	NA	ND	NA
53	83	Ethyl octanoate	106-32-1	C10H20O2	ND	NA	ND	NA
54	85	p-Menthone	10458-14-7	C10H18O	ND	NA	ND	NA
55	87	Neomenthol	2216-52-6	C10H20O	ND	NA	ND	NA
56	89	4-Terpineol	20126-76-5	C10H18O	ND	NA	ND	NA
57	90	Menthol	15356-70-4	C10H20O	0.824627	0.292979	0.690255	0.00663973
58	95	3'-Methylacetophenone	585-74-0	C9H10O	ND	NA	ND	NA
59	96	α-Terpineol	10482-56-1	C10H18O	ND	NA	ND	NA
60	98	Methyl salicylate	119-36-8	C8H8O3	ND	NA	ND	NA
61	99	γ-Heptalactone	105-21-5	C7H12O2	ND	NA	ND	NA
62	100	Linaly acetate	115-95-7	C12H20O2	ND	NA	ND	NA
63	101	Ethyl Maltol	4940-11-8	C7H8O3	ND	NA	ND	NA
64	103	Benzeneacetic acid, ethyl ester	101-97-3	C10H12O2	ND	NA	ND	NA
65	104	trans-Geraniol	106-24-1	C10H18O	ND	NA	ND	NA
66	106	Pulegone	89-82-7	C10H16O	ND	NA	ND	NA
67	107	Ethyl nonanoate	123-29-5	C11H22O2	ND	NA	ND	NA
68	108	Carvone	99-49-0	C10H14O	ND	NA	ND	NA
69	109	Menthyl Acetate	16409-45-3	C12H22O2	ND	NA	ND	NA
70	110	Benzaldehyde PG acetal	2568-25-4	C10H12O2	ND	NA	ND	NA
71	111	Citral	5392-40-5	C10H16O	ND	NA	ND	NA
72	113	Piperitone	89-81-6	C10H16O	ND	NA	ND	NA
73	114	p-Anisaldehyde	123-11-5	C8H8O2	ND	NA	ND	NA
74	116	Cinnamaldehyde, (E)-	14371-10-9	C9H8O	ND	NA	ND	NA
75	117	Thymol	89-83-8	C10H14O	ND	NA	ND	NA
76	120	Nerol acetate	141-12-8	C12H20O2	ND	NA	ND	NA
77	122	Benzyl Butyrate	103-37-7	C11H14O2	ND	NA	ND	NA
78	124	Triacetin	102-76-1	C9H14O6	12.6155	0.714892	14497.4	868.185
79	125	Geraniol Acetate	105-87-3	C12H20O2	ND	NA	ND	NA
80	127	Ethyl decanoate	110-38-3	C12H24O2	ND	NA	ND	NA
81	129	Eugenol	97-53-0	C10H12O2	ND	NA	ND	NA
82	132	Piperonal	120-57-0	C8H6O3	ND	NA	ND	NA
83	134	Methyl cinnamate	103-26-4	C10H10O2	ND	NA	ND	NA
84	138	β-Caryophyllene	87-44-5	C15H24	ND	NA	ND	NA
85	139	γ-Nonalactone	104-61-0	C9H16O2	ND	NA	ND	NA
86	141	β-Damascone	23726-91-2	C13H20O	ND	NA	ND	NA
87	143	α-Ionone	127-41-3	C13H20O	ND	NA	ND	NA
88	144	Ethyl anthranilate	87-25-2	C9H11NO2	ND	NA	ND	NA
89	148	α-Caryophyllene (α-Humulene)	6753-98-6	C15H24	ND	NA	ND	NA
90	149	Vanillin	121-33-5	C8H8O3	ND	NA	ND	NA
91	150	Ethyl Cinnamate	103-36-6	C11H12O2	ND	NA	ND	NA
92	154	(E)-β-Ionone	79-77-6	C13H20O	ND	NA	ND	NA
93	155	Ethyl Vanillin	121-32-4	C9H10O3	ND	NA	ND	NA
94	158	γ-Decalactone	706-14-9	C10H18O2	ND	NA	ND	NA
95	159	Acetyleugenol	93-28-7	C12H14O3	ND	NA	ND	NA
96	160	Raspberry Ketone methyl ether	104-20-1	C11H14O2	ND	NA	ND	NA
97	164	Ethyl Laurate	106-33-2	C14H28O2	ND	NA	ND	NA
98	165	δ-Decalactone	705-86-2	C10H18O2	ND	NA	ND	NA
99	167	δ-Undecalactone	104-67-6	C11H20O2	ND	NA	ND	NA
100	168	Raspberry ketone	5471-51-2	C10H12O2	ND	NA	ND	NA
101	172	Benzophenone	119-61-9	C13H10O	ND	NA	ND	NA
102	174	δ-Dodecalactone	713-95-1	C12H22O2	ND	NA	ND	NA
103	178	Caffeine	58-08-2	C8H10N4O2	ND	NA	ND	NA

## Sheet: LSFF_OPG
Sample data summary				ND	not detected
concentrations are in ug/cig material				NA	not available
Fruit
Mint related				Cigarette	Lucky Strike Flow Filter Tobacco (Oct Pack Green)		Lucky Strike Flow Filter Filter (Oct Pack Green)
				Replicate #	2		2
					Average	stdev	Average	stdev
				Sample (g/cig)	0.64235	0.00388909	0.292075	0.000601041
#	Flavor List #	Compound Name	CAS Number	Formula
1	2	Ethyl Acetate	141-78-6	C4H8O2	ND	NA	ND	NA
2	3	Hydroxyacetone	116-09-6	C3H6O2	0.86731	0.0506713	1.27072	0.18849
3	5	Ethyl Propanoate	105-37-3	C5H10O2	ND	NA	ND	NA
4	8	Isopentyl Alcohol	123-51-3	C5H12O	ND	NA	ND	NA
5	11	1-Pentanol	71-41-0	C5H12O	ND	NA	ND	NA
6	13	Ethyl butanoate	105-54-4	C6H12O2	ND	NA	0.35049	0.000721249
7	14	Hexanal	66-25-1	C6H12O	ND	NA	ND	NA
8	15	Butyl Acetate	123-86-4	C6H12O2	ND	NA	ND	NA
9	17	Ethyl 2-methylbutanoate	7452-79-1	C7H14O2	ND	NA	ND	NA
10	18	Ethyl Isovalerate	108-64-5	C7H14O2	ND	NA	ND	NA
11	19	Furfural	98-01-1	C5H4O2	ND	NA	0.379655	0.0405243
12	20	Isoamyl Acetate	123-92-2	C7H14O2	ND	NA	ND	NA
13	21	2-Methylbutyl Acetate	624-41-9	C7H14O2	ND	NA	ND	NA
14	22	(3Z)-3-Hexen-1-ol	928-96-1	C6H12O	ND	NA	ND	NA
15	23	2-Hexen-1-ol, (E)-	928-95-0	C6H12O	ND	NA	ND	NA
15	24	1-Hexanol	111-27-3	C6H14O	ND	NA	ND	NA
16	25	Furfuryl alcohol	98-00-0	C5H6O2	ND	NA	1.03693	0.0640922
17	26	Amyl Acetate	628-63-7	C7H14O2	ND	NA	ND	NA
18	27	2,5-dimethylpyrazine	123-32-0	C6H8N2	ND	NA	0.408948	0.0421471
19	28	(3Z)-3-Hexenyl Formate	33467-73-1	C7H12O2	ND	NA	ND	NA
20	29	α-Pinene	80-56-8	C10H16	ND	NA	6.95151	0.138222
21	34	β-Myrcene	123-35-3	C10H16	ND	NA	ND	NA
22	35	β-Pinene	127-91-3	C10H16	ND	NA	5.65159	0.0503283
23	36	Butyl butyrate	109-21-7	C8H16O2	ND	NA	ND	NA
24	37	Ethyl hexanoate	123-66-0	C8H16O2	ND	NA	ND	NA
25	38	Benzaldehyde	100-52-7	C7H6O	0.192705	0.00116673	2.64334	0.0673979
26	42	2,3,5-Trimethylpyrazine	14667-55-1	C7H10N2	ND	NA	ND	NA
27	43	Hexyl acetate	142-92-7	C8H16O2	ND	NA	ND	NA
28	45	1,4-Cineol	470-67-7	C10H18O	ND	NA	ND	NA
29	46	Limonene	138-86-3	C10H16	0.353155	0.043282	58.4289	0.519999
30	47	p-Cymene	99-87-6	C10H14	ND	NA	0.715605	0.0221254
31	49	Eucalyptol	470-82-6	C10H18O	ND	NA	6.49878	0.116637
32	50	γ-Terpinene	99-85-4	C10H16	ND	NA	ND	NA
33	51	Dimethyl butanedioate	106-65-0	C6H10O4	ND	NA	4.32284	0.132812
34	53	Isoamyl Butyrate	106-27-4	C9H18O2	ND	NA	ND	NA
35	55	Ally hexanoate	123-68-2	C9H16O2	ND	NA	ND	NA
36	57	Benzyl Alcohol	100-51-6	C7H8O	12.8478	0.350308	151.095	5.14368
37	60	Ethyl Heptanoate	106-30-9	C9H18O2	ND	NA	ND	NA
38	61	cis-Linalool oxide	5989-33-3	C10H18O2	ND	NA	ND	NA
39	62	Furaneol	3658-77-3	C6H8O3	ND	NA	ND	NA
40	63	Isoamyl Isovalerate	659-70-1	C10H20O2	ND	NA	ND	NA
41	64	Amyl Isovalerate	25415-62-7	C10H20O2	ND	NA	ND	NA
42	67	Acetophenone	98-86-2	C8H8O	ND	NA	0.277493	0.0212238
43	68	Linalool	78-70-6	C10H18O	ND	NA	1.70858	0.0584424
44	69	2-Acetylpyrrole	1072-83-9	C6H7NO	0.25694	0.00155563	1.16839	0.0850154
45	74	cis-Limonene oxide	13837-75-7	C10H16O	ND	NA	ND	NA
46	75	Fenchol	1632-73-1	C10H18O	ND	NA	ND	NA
47	76	trans-Limonene oxide	6909-30-4	C10H16O	ND	NA	ND	NA
48	77	Maltol	118-71-8	C6H6O3	ND	NA	ND	NA
49	78	Phenethyl alcohol	60-12-8	C8H10O	0.25694	0.00155563	1.28526	0.126562
50	79	β-Citronellal	106-23-0	C10H18O	ND	NA	ND	NA
51	80	Isopulegol	89-79-2	C10H18O	ND	NA	12.428	0.252755
52	82	Benzyl acetate	140-11-4	C9H10O2	0.38541	0.00233345	5.90017	0.259975
53	83	Ethyl octanoate	106-32-1	C10H20O2	ND	NA	ND	NA
54	85	p-Menthone	10458-14-7	C10H18O	ND	NA	15.101	0.691964
55	87	Neomenthol	2216-52-6	C10H20O	0.546135	0.0487267	6.3234	0.00764029
56	89	4-Terpineol	20126-76-5	C10H18O	ND	NA	ND	NA
57	90	Menthol	15356-70-4	C10H20O	752.434	10.4148	7518.15	4.31857
58	95	3'-Methylacetophenone	585-74-0	C9H10O	ND	NA	ND	NA
59	96	α-Terpineol	10482-56-1	C10H18O	ND	NA	1.25605	0.126501
60	98	Methyl salicylate	119-36-8	C8H8O3	ND	NA	0.817767	0.0396227
61	99	γ-Heptalactone	105-21-5	C7H12O2	ND	NA	ND	NA
62	100	Linaly acetate	115-95-7	C12H20O2	ND	NA	ND	NA
63	101	Ethyl Maltol	4940-11-8	C7H8O3	ND	NA	ND	NA
64	103	Benzeneacetic acid, ethyl ester	101-97-3	C10H12O2	ND	NA	ND	NA
65	104	trans-Geraniol	106-24-1	C10H18O	ND	NA	ND	NA
66	106	Pulegone	89-82-7	C10H16O	ND	NA	0.861642	0.0224259
67	107	Ethyl nonanoate	123-29-5	C11H22O2	ND	NA	ND	NA
68	108	Carvone	99-49-0	C10H14O	ND	NA	209.453	6.50294
69	109	Menthyl Acetate	16409-45-3	C12H22O2	1.63786	0.0355038	7.38945	0.0260993
70	110	Benzaldehyde PG acetal	2568-25-4	C10H12O2	ND	NA	ND	NA
71	111	Citral	5392-40-5	C10H16O	ND	NA	ND	NA
72	113	Piperitone	89-81-6	C10H16O	ND	NA	ND	NA
73	114	p-Anisaldehyde	123-11-5	C8H8O2	ND	NA	ND	NA
74	116	Cinnamaldehyde, (E)-	14371-10-9	C9H8O	ND	NA	ND	NA
75	117	Thymol	89-83-8	C10H14O	ND	NA	ND	NA
76	120	Nerol acetate	141-12-8	C12H20O2	ND	NA	ND	NA
77	122	Benzyl Butyrate	103-37-7	C11H14O2	ND	NA	ND	NA
78	124	Triacetin	102-76-1	C9H14O6	49.2652	0.700969	19340	209.048
79	125	Geraniol Acetate	105-87-3	C12H20O2	ND	NA	ND	NA
80	127	Ethyl decanoate	110-38-3	C12H24O2	ND	NA	ND	NA
81	129	Eugenol	97-53-0	C10H12O2	ND	NA	ND	NA
82	132	Piperonal	120-57-0	C8H6O3	ND	NA	ND	NA
83	134	Methyl cinnamate	103-26-4	C10H10O2	ND	NA	ND	NA
84	138	β-Caryophyllene	87-44-5	C15H24	3.88608	0.021892	6.58661	0.323346
85	139	γ-Nonalactone	104-61-0	C9H16O2	ND	NA	ND	NA
86	141	β-Damascone	23726-91-2	C13H20O	ND	NA	ND	NA
87	143	α-Ionone	127-41-3	C13H20O	ND	NA	ND	NA
88	144	Ethyl anthranilate	87-25-2	C9H11NO2	ND	NA	ND	NA
89	148	α-Caryophyllene (α-Humulene)	6753-98-6	C15H24	0.51388	0.00311127	0.70098	0.0014425
90	149	Vanillin	121-33-5	C8H8O3	ND	NA	ND	NA
91	150	Ethyl Cinnamate	103-36-6	C11H12O2	ND	NA	ND	NA
92	154	(E)-β-Ionone	79-77-6	C13H20O	ND	NA	ND	NA
93	155	Ethyl Vanillin	121-32-4	C9H10O3	ND	NA	ND	NA
94	158	γ-Decalactone	706-14-9	C10H18O2	ND	NA	ND	NA
95	159	Acetyleugenol	93-28-7	C12H14O3	ND	NA	ND	NA
96	160	Raspberry Ketone methyl ether	104-20-1	C11H14O2	ND	NA	ND	NA
97	164	Ethyl Laurate	106-33-2	C14H28O2	ND	NA	ND	NA
98	165	δ-Decalactone	705-86-2	C10H18O2	ND	NA	ND	NA
99	167	δ-Undecalactone	104-67-6	C11H20O2	ND	NA	ND	NA
100	168	Raspberry ketone	5471-51-2	C10H12O2	ND	NA	ND	NA
101	172	Benzophenone	119-61-9	C13H10O	ND	NA	ND	NA
102	174	δ-Dodecalactone	713-95-1	C12H22O2	ND	NA	ND	NA
103	178	Caffeine	58-08-2	C8H10N4O2	ND	NA	ND	NA

## Sheet: NG
Sample data summary				ND	not detected
concentrations are in ug/cig material				NA	not available
Fruit
Mint related				Cigarette	Next Green Tobacco		Next Green Filter
				Replicate #	2		2
					Average	stdev	Average	stdev
				Sample (g/cig)	0.73025	0.00233345	0.212975	0.00180312
#	Flavor List #	Compound Name	CAS Number	Formula
1	2	Ethyl Acetate	141-78-6	C4H8O2	ND	NA	ND	NA
2	3	Hydroxyacetone	116-09-6	C3H6O2	3.46828	0.247098	ND	NA
3	5	Ethyl Propanoate	105-37-3	C5H10O2	ND	NA	ND	NA
4	8	Isopentyl Alcohol	123-51-3	C5H12O	ND	NA	ND	NA
5	11	1-Pentanol	71-41-0	C5H12O	ND	NA	ND	NA
6	13	Ethyl butanoate	105-54-4	C6H12O2	ND	NA	ND	NA
7	14	Hexanal	66-25-1	C6H12O	ND	NA	ND	NA
8	15	Butyl Acetate	123-86-4	C6H12O2	ND	NA	ND	NA
9	17	Ethyl 2-methylbutanoate	7452-79-1	C7H14O2	ND	NA	ND	NA
10	18	Ethyl Isovalerate	108-64-5	C7H14O2	ND	NA	ND	NA
11	19	Furfural	98-01-1	C5H4O2	0.25567	0.0524532	ND	NA
12	20	Isoamyl Acetate	123-92-2	C7H14O2	ND	NA	ND	NA
13	21	2-Methylbutyl Acetate	624-41-9	C7H14O2	ND	NA	ND	NA
14	22	(3Z)-3-Hexen-1-ol	928-96-1	C6H12O	ND	NA	ND	NA
15	23	2-Hexen-1-ol, (E)-	928-95-0	C6H12O	ND	NA	ND	NA
15	24	1-Hexanol	111-27-3	C6H14O	ND	NA	ND	NA
16	25	Furfuryl alcohol	98-00-0	C5H6O2	1.42407	0.0561867	0.383865	0.123722
17	26	Amyl Acetate	628-63-7	C7H14O2	ND	NA	ND	NA
18	27	2,5-dimethylpyrazine	123-32-0	C6H8N2	ND	NA	ND	NA
19	28	(3Z)-3-Hexenyl Formate	33467-73-1	C7H12O2	ND	NA	ND	NA
20	29	α-Pinene	80-56-8	C10H16	ND	NA	4.34367	5.2339
21	34	β-Myrcene	123-35-3	C10H16	ND	NA	ND	NA
22	35	β-Pinene	127-91-3	C10H16	ND	NA	0.40223	NA
23	36	Butyl butyrate	109-21-7	C8H16O2	ND	NA	ND	NA
24	37	Ethyl hexanoate	123-66-0	C8H16O2	ND	NA	ND	NA
25	38	Benzaldehyde	100-52-7	C7H6O	ND	NA	0.22356	0.0131663
26	42	2,3,5-Trimethylpyrazine	14667-55-1	C7H10N2	ND	NA	ND	NA
27	43	Hexyl acetate	142-92-7	C8H16O2	ND	NA	ND	NA
28	45	1,4-Cineol	470-67-7	C10H18O	ND	NA	ND	NA
29	46	Limonene	138-86-3	C10H16	ND	NA	ND	NA
30	47	p-Cymene	99-87-6	C10H14	ND	NA	ND	NA
31	49	Eucalyptol	470-82-6	C10H18O	ND	NA	ND	NA
32	50	γ-Terpinene	99-85-4	C10H16	ND	NA	ND	NA
33	51	Dimethyl butanedioate	106-65-0	C6H10O4	ND	NA	ND	NA
34	53	Isoamyl Butyrate	106-27-4	C9H18O2	ND	NA	ND	NA
35	55	Ally hexanoate	123-68-2	C9H16O2	ND	NA	ND	NA
36	57	Benzyl Alcohol	100-51-6	C7H8O	0.401555	0.0503531	1.21332	0.140318
37	60	Ethyl Heptanoate	106-30-9	C9H18O2	ND	NA	ND	NA
38	61	cis-Linalool oxide	5989-33-3	C10H18O2	ND	NA	ND	NA
39	62	Furaneol	3658-77-3	C6H8O3	ND	NA	ND	NA
40	63	Isoamyl Isovalerate	659-70-1	C10H20O2	ND	NA	ND	NA
41	64	Amyl Isovalerate	25415-62-7	C10H20O2	ND	NA	ND	NA
42	67	Acetophenone	98-86-2	C8H8O	ND	NA	ND	NA
43	68	Linalool	78-70-6	C10H18O	ND	NA	ND	NA
44	69	2-Acetylpyrrole	1072-83-9	C6H7NO	0.255505	0.0508198	0.39394	0.0117238
45	74	cis-Limonene oxide	13837-75-7	C10H16O	ND	NA	ND	NA
46	75	Fenchol	1632-73-1	C10H18O	ND	NA	ND	NA
47	76	trans-Limonene oxide	6909-30-4	C10H16O	ND	NA	ND	NA
48	77	Maltol	118-71-8	C6H6O3	ND	NA	ND	NA
49	78	Phenethyl alcohol	60-12-8	C8H10O	0.18248	0.0510531	0.6175	0.0248902
50	79	β-Citronellal	106-23-0	C10H18O	ND	NA	ND	NA
51	80	Isopulegol	89-79-2	C10H18O	ND	NA	ND	NA
52	82	Benzyl acetate	140-11-4	C9H10O2	ND	NA	ND	NA
53	83	Ethyl octanoate	106-32-1	C10H20O2	ND	NA	ND	NA
54	85	p-Menthone	10458-14-7	C10H18O	ND	NA	ND	NA
55	87	Neomenthol	2216-52-6	C10H20O	ND	NA	ND	NA
56	89	4-Terpineol	20126-76-5	C10H18O	ND	NA	ND	NA
57	90	Menthol	15356-70-4	C10H20O	1.3517	0.469045	1.01182	0.0537437
58	95	3'-Methylacetophenone	585-74-0	C9H10O	ND	NA	ND	NA
59	96	α-Terpineol	10482-56-1	C10H18O	ND	NA	ND	NA
60	98	Methyl salicylate	119-36-8	C8H8O3	ND	NA	ND	NA
61	99	γ-Heptalactone	105-21-5	C7H12O2	ND	NA	ND	NA
62	100	Linaly acetate	115-95-7	C12H20O2	ND	NA	ND	NA
63	101	Ethyl Maltol	4940-11-8	C7H8O3	ND	NA	ND	NA
64	103	Benzeneacetic acid, ethyl ester	101-97-3	C10H12O2	ND	NA	ND	NA
65	104	trans-Geraniol	106-24-1	C10H18O	ND	NA	ND	NA
66	106	Pulegone	89-82-7	C10H16O	ND	NA	ND	NA
67	107	Ethyl nonanoate	123-29-5	C11H22O2	ND	NA	ND	NA
68	108	Carvone	99-49-0	C10H14O	ND	NA	ND	NA
69	109	Menthyl Acetate	16409-45-3	C12H22O2	ND	NA	ND	NA
70	110	Benzaldehyde PG acetal	2568-25-4	C10H12O2	ND	NA	ND	NA
71	111	Citral	5392-40-5	C10H16O	ND	NA	ND	NA
72	113	Piperitone	89-81-6	C10H16O	ND	NA	ND	NA
73	114	p-Anisaldehyde	123-11-5	C8H8O2	ND	NA	ND	NA
74	116	Cinnamaldehyde, (E)-	14371-10-9	C9H8O	ND	NA	ND	NA
75	117	Thymol	89-83-8	C10H14O	ND	NA	ND	NA
76	120	Nerol acetate	141-12-8	C12H20O2	ND	NA	ND	NA
77	122	Benzyl Butyrate	103-37-7	C11H14O2	ND	NA	ND	NA
78	124	Triacetin	102-76-1	C9H14O6	3.25102	0.888204	3066.08	50.038
79	125	Geraniol Acetate	105-87-3	C12H20O2	ND	NA	ND	NA
80	127	Ethyl decanoate	110-38-3	C12H24O2	ND	NA	ND	NA
81	129	Eugenol	97-53-0	C10H12O2	ND	NA	ND	NA
82	132	Piperonal	120-57-0	C8H6O3	ND	NA	ND	NA
83	134	Methyl cinnamate	103-26-4	C10H10O2	ND	NA	ND	NA
84	138	β-Caryophyllene	87-44-5	C15H24	ND	NA	ND	NA
85	139	γ-Nonalactone	104-61-0	C9H16O2	ND	NA	ND	NA
86	141	β-Damascone	23726-91-2	C13H20O	ND	NA	ND	NA
87	143	α-Ionone	127-41-3	C13H20O	ND	NA	ND	NA
88	144	Ethyl anthranilate	87-25-2	C9H11NO2	ND	NA	ND	NA
89	148	α-Caryophyllene (α-Humulene)	6753-98-6	C15H24	ND	NA	ND	NA
90	149	Vanillin	121-33-5	C8H8O3	ND	NA	ND	NA
91	150	Ethyl Cinnamate	103-36-6	C11H12O2	ND	NA	ND	NA
92	154	(E)-β-Ionone	79-77-6	C13H20O	ND	NA	ND	NA
93	155	Ethyl Vanillin	121-32-4	C9H10O3	ND	NA	ND	NA
94	158	γ-Decalactone	706-14-9	C10H18O2	ND	NA	ND	NA
95	159	Acetyleugenol	93-28-7	C12H14O3	ND	NA	ND	NA
96	160	Raspberry Ketone methyl ether	104-20-1	C11H14O2	ND	NA	ND	NA
97	164	Ethyl Laurate	106-33-2	C14H28O2	ND	NA	ND	NA
98	165	δ-Decalactone	705-86-2	C10H18O2	ND	NA	ND	NA
99	167	δ-Undecalactone	104-67-6	C11H20O2	ND	NA	ND	NA
100	168	Raspberry ketone	5471-51-2	C10H12O2	ND	NA	ND	NA
101	172	Benzophenone	119-61-9	C13H10O	ND	NA	ND	NA
102	174	δ-Dodecalactone	713-95-1	C12H22O2	ND	NA	ND	NA
103	178	Caffeine	58-08-2	C8H10N4O2	ND	NA	ND	NA

## Sheet: BHU
Sample data summary				ND	not detected
concentrations are in ug/cig material				NA	not available
Fruit
Mint related				Cigarette	Benson & Hedges Unison Tobacco		Benson & Hedges Unison Filter
				Replicate #	2		2
					Average	stdev	Average	stdev
				Sample (g/cig)	0.80665	0.0111016	0.227325	0.00208597
#	Flavor List #	Compound Name	CAS Number	Formula
1	2	Ethyl Acetate	141-78-6	C4H8O2	ND	NA	3.92187	0.148503
2	3	Hydroxyacetone	116-09-6	C3H6O2	3.06684	0.270341	ND	NA
3	5	Ethyl Propanoate	105-37-3	C5H10O2	ND	NA	ND	NA
4	8	Isopentyl Alcohol	123-51-3	C5H12O	ND	NA	ND	NA
5	11	1-Pentanol	71-41-0	C5H12O	ND	NA	ND	NA
6	13	Ethyl butanoate	105-54-4	C6H12O2	ND	NA	ND	NA
7	14	Hexanal	66-25-1	C6H12O	ND	NA	ND	NA
8	15	Butyl Acetate	123-86-4	C6H12O2	ND	NA	ND	NA
9	17	Ethyl 2-methylbutanoate	7452-79-1	C7H14O2	ND	NA	ND	NA
10	18	Ethyl Isovalerate	108-64-5	C7H14O2	ND	NA	ND	NA
11	19	Furfural	98-01-1	C5H4O2	ND	NA	ND	NA
12	20	Isoamyl Acetate	123-92-2	C7H14O2	ND	NA	ND	NA
13	21	2-Methylbutyl Acetate	624-41-9	C7H14O2	ND	NA	ND	NA
14	22	(3Z)-3-Hexen-1-ol	928-96-1	C6H12O	ND	NA	ND	NA
15	23	2-Hexen-1-ol, (E)-	928-95-0	C6H12O	ND	NA	ND	NA
15	24	1-Hexanol	111-27-3	C6H14O	ND	NA	ND	NA
16	25	Furfuryl alcohol	98-00-0	C5H6O2	1.25148	0.188324	0.363572	0.0288111
17	26	Amyl Acetate	628-63-7	C7H14O2	ND	NA	ND	NA
18	27	2,5-dimethylpyrazine	123-32-0	C6H8N2	ND	NA	ND	NA
19	28	(3Z)-3-Hexenyl Formate	33467-73-1	C7H12O2	ND	NA	ND	NA
20	29	α-Pinene	80-56-8	C10H16	ND	NA	ND	NA
21	34	β-Myrcene	123-35-3	C10H16	ND	NA	ND	NA
22	35	β-Pinene	127-91-3	C10H16	ND	NA	ND	NA
23	36	Butyl butyrate	109-21-7	C8H16O2	ND	NA	ND	NA
24	37	Ethyl hexanoate	123-66-0	C8H16O2	ND	NA	ND	NA
25	38	Benzaldehyde	100-52-7	C7H6O	ND	NA	ND	NA
26	42	2,3,5-Trimethylpyrazine	14667-55-1	C7H10N2	ND	NA	ND	NA
27	43	Hexyl acetate	142-92-7	C8H16O2	ND	NA	ND	NA
28	45	1,4-Cineol	470-67-7	C10H18O	ND	NA	ND	NA
29	46	Limonene	138-86-3	C10H16	ND	NA	ND	NA
30	47	p-Cymene	99-87-6	C10H14	ND	NA	ND	NA
31	49	Eucalyptol	470-82-6	C10H18O	ND	NA	ND	NA
32	50	γ-Terpinene	99-85-4	C10H16	ND	NA	ND	NA
33	51	Dimethyl butanedioate	106-65-0	C6H10O4	ND	NA	ND	NA
34	53	Isoamyl Butyrate	106-27-4	C9H18O2	ND	NA	ND	NA
35	55	Ally hexanoate	123-68-2	C9H16O2	ND	NA	ND	NA
36	57	Benzyl Alcohol	100-51-6	C7H8O	0.48399	0.00666095	0.78405	0.0410263
37	60	Ethyl Heptanoate	106-30-9	C9H18O2	ND	NA	ND	NA
38	61	cis-Linalool oxide	5989-33-3	C10H18O2	ND	NA	ND	NA
39	62	Furaneol	3658-77-3	C6H8O3	ND	NA	ND	NA
40	63	Isoamyl Isovalerate	659-70-1	C10H20O2	ND	NA	ND	NA
41	64	Amyl Isovalerate	25415-62-7	C10H20O2	ND	NA	ND	NA
42	67	Acetophenone	98-86-2	C8H8O	ND	NA	ND	NA
43	68	Linalool	78-70-6	C10H18O	ND	NA	ND	NA
44	69	2-Acetylpyrrole	1072-83-9	C6H7NO	0.403325	0.00555079	0.27279	0.00250316
45	74	cis-Limonene oxide	13837-75-7	C10H16O	ND	NA	ND	NA
46	75	Fenchol	1632-73-1	C10H18O	ND	NA	ND	NA
47	76	trans-Limonene oxide	6909-30-4	C10H16O	ND	NA	ND	NA
48	77	Maltol	118-71-8	C6H6O3	ND	NA	ND	NA
49	78	Phenethyl alcohol	60-12-8	C8H10O	0.241995	0.00333047	0.28423	0.0186818
50	79	β-Citronellal	106-23-0	C10H18O	ND	NA	ND	NA
51	80	Isopulegol	89-79-2	C10H18O	ND	NA	ND	NA
52	82	Benzyl acetate	140-11-4	C9H10O2	ND	NA	ND	NA
53	83	Ethyl octanoate	106-32-1	C10H20O2	ND	NA	ND	NA
54	85	p-Menthone	10458-14-7	C10H18O	ND	NA	ND	NA
55	87	Neomenthol	2216-52-6	C10H20O	ND	NA	ND	NA
56	89	4-Terpineol	20126-76-5	C10H18O	ND	NA	ND	NA
57	90	Menthol	15356-70-4	C10H20O	ND	NA	0.499968	0.0275595
58	95	3'-Methylacetophenone	585-74-0	C9H10O	ND	NA	ND	NA
59	96	α-Terpineol	10482-56-1	C10H18O	ND	NA	ND	NA
60	98	Methyl salicylate	119-36-8	C8H8O3	ND	NA	ND	NA
61	99	γ-Heptalactone	105-21-5	C7H12O2	ND	NA	ND	NA
62	100	Linaly acetate	115-95-7	C12H20O2	ND	NA	ND	NA
63	101	Ethyl Maltol	4940-11-8	C7H8O3	ND	NA	ND	NA
64	103	Benzeneacetic acid, ethyl ester	101-97-3	C10H12O2	ND	NA	ND	NA
65	104	trans-Geraniol	106-24-1	C10H18O	ND	NA	ND	NA
66	106	Pulegone	89-82-7	C10H16O	ND	NA	ND	NA
67	107	Ethyl nonanoate	123-29-5	C11H22O2	ND	NA	ND	NA
68	108	Carvone	99-49-0	C10H14O	ND	NA	ND	NA
69	109	Menthyl Acetate	16409-45-3	C12H22O2	ND	NA	ND	NA
70	110	Benzaldehyde PG acetal	2568-25-4	C10H12O2	ND	NA	ND	NA
71	111	Citral	5392-40-5	C10H16O	ND	NA	ND	NA
72	113	Piperitone	89-81-6	C10H16O	ND	NA	ND	NA
73	114	p-Anisaldehyde	123-11-5	C8H8O2	ND	NA	ND	NA
74	116	Cinnamaldehyde, (E)-	14371-10-9	C9H8O	ND	NA	ND	NA
75	117	Thymol	89-83-8	C10H14O	ND	NA	ND	NA
76	120	Nerol acetate	141-12-8	C12H20O2	ND	NA	ND	NA
77	122	Benzyl Butyrate	103-37-7	C11H14O2	ND	NA	ND	NA
78	124	Triacetin	102-76-1	C9H14O6	1.65324	0.0342805	6654.8	427.332
79	125	Geraniol Acetate	105-87-3	C12H20O2	ND	NA	ND	NA
80	127	Ethyl decanoate	110-38-3	C12H24O2	ND	NA	ND	NA
81	129	Eugenol	97-53-0	C10H12O2	ND	NA	ND	NA
82	132	Piperonal	120-57-0	C8H6O3	ND	NA	ND	NA
83	134	Methyl cinnamate	103-26-4	C10H10O2	ND	NA	ND	NA
84	138	β-Caryophyllene	87-44-5	C15H24	ND	NA	ND	NA
85	139	γ-Nonalactone	104-61-0	C9H16O2	ND	NA	ND	NA
86	141	β-Damascone	23726-91-2	C13H20O	ND	NA	ND	NA
87	143	α-Ionone	127-41-3	C13H20O	ND	NA	ND	NA
88	144	Ethyl anthranilate	87-25-2	C9H11NO2	ND	NA	ND	NA
89	148	α-Caryophyllene (α-Humulene)	6753-98-6	C15H24	ND	NA	ND	NA
90	149	Vanillin	121-33-5	C8H8O3	ND	NA	ND	NA
91	150	Ethyl Cinnamate	103-36-6	C11H12O2	ND	NA	ND	NA
92	154	(E)-β-Ionone	79-77-6	C13H20O	ND	NA	ND	NA
93	155	Ethyl Vanillin	121-32-4	C9H10O3	ND	NA	ND	NA
94	158	γ-Decalactone	706-14-9	C10H18O2	ND	NA	ND	NA
95	159	Acetyleugenol	93-28-7	C12H14O3	ND	NA	ND	NA
96	160	Raspberry Ketone methyl ether	104-20-1	C11H14O2	ND	NA	ND	NA
97	164	Ethyl Laurate	106-33-2	C14H28O2	ND	NA	ND	NA
98	165	δ-Decalactone	705-86-2	C10H18O2	ND	NA	ND	NA
99	167	δ-Undecalactone	104-67-6	C11H20O2	ND	NA	ND	NA
100	168	Raspberry ketone	5471-51-2	C10H12O2	ND	NA	ND	NA
101	172	Benzophenone	119-61-9	C13H10O	ND	NA	ND	NA
102	174	δ-Dodecalactone	713-95-1	C12H22O2	ND	NA	ND	NA
103	178	Caffeine	58-08-2	C8H10N4O2	ND	NA	ND	NA

[truncated: 29 more sheets: PMXL_TM, MRFB, PMXL_MN, LSFF_MPB, LSFF_MPO, LSFF_MPG, LSFF_MPR, MDFV, LMXL_BEIS, BHCB, PMW, BHCV, BHPP, CFCP, MDFR, MFS, MDFA, PMXL_M, PMXL_BEMC, LSCP …]
